# Supplementary material for: Copper-catalyzed cascade annulation of unsaturated α-bromocarbonyls with enynals: a facile access to ketones from aldehydes
Source: PubMed Central journal article supplement (PMC6014112; doi:10.1039/c5sc04980f), 2016-03-04

*Supporting Information to*

**Copper-catalyzed cascade annulation of unsaturated  
 $\alpha$ -bromocarbonyls with enynals: a facile access to ketones  
from aldehydes**

Chao Che, Qianwen Huang, Hanliang Zheng and Gangguo Zhu\*

*Department of Chemistry, Zhejiang Normal University, 688 Yingbin Road, Jinhua 321004, China*

*gangguo@zjnu.cn*

**Table of Contents**

|                                                                    |         |
|--------------------------------------------------------------------|---------|
| <b>General</b> .....                                               | S2      |
| <b>General Procedure for Experiments and Analytical Data</b> ..... | S2-S18  |
| <b>NMR Spectra</b> .....                                           | S19-S62 |

**General.** Unless otherwise noted, materials obtained from commercial suppliers were used directly without further purification.  $^1\text{H}$ ,  $^{13}\text{C}$ , and  $^{19}\text{F}$  NMR spectra were measured on a 600 MHz or 400 MHz NMR spectrometer using  $\text{CDCl}_3$  as the solvent with tetramethylsilane (TMS) as the internal standard. Chemical shifts ( $\delta$ ) are given in parts per million relative to TMS, and the coupling constants are given in hertz. High-resolution mass spectrometry (HRMS) analyses were carried out using a TOF MS instrument with APCI or ESI source. Column chromatography was performed using silica gel (100–200 mesh).

**General Procedure for the Copper-Catalyzed Cascade Annulation of Unsaturated  $\alpha$ -Bromocarbonyls with Enynals:**

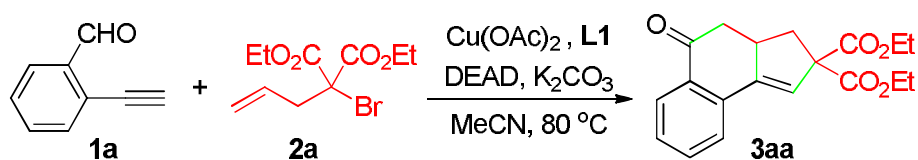

To a mixture of  $\text{Cu}(\text{OAc})_2$  (4.5 mg, 0.025 mmol), pentamethyldiethylenetriamine (**L1**) (8.7 mg, 0.050 mmol), DEAD (8.7 mg, 0.050 mmol) and  $\text{K}_2\text{CO}_3$  (34.6 mg, 0.25 mmol) was added a solution of **1a** (32.5 mg, 0.25 mmol) and **2a** (83.4 mg, 0.30 mmol) in 3 mL of MeCN under a nitrogen atmosphere. After stirring at 80 °C for 10 h, the reaction mixture was quenched with water, extracted with EtOAc, washed with brine, dried over anhydrous  $\text{Na}_2\text{SO}_4$ , and concentrated. Column chromatography on silica gel (EtOAc/petroleum ether = 1:10) gave 71 mg of **3aa** (yield: 86%) as a colorless oil.  $^1\text{H}$  NMR (400 MHz,  $\text{CDCl}_3$ )  $\delta$  1.25–1.33 (m, 6H), 2.12 (dd,  $J$  = 8.4, 13.3 Hz, 1H), 2.50 (dd,  $J$  = 14.0, 15.6 Hz, 1H), 2.96–3.10 (m, 2H), 3.49–3.61 (m, 1H), 4.15–4.30 (m, 4H), 6.37 (d,  $J$  = 1.9 Hz, 1H), 7.38–7.45 (m, 1H), 7.53–7.59 (m, 1H), 7.67–7.71 (m, 1H), 7.90–8.10 (m, 1H);  $^{13}\text{C}$  NMR (100 MHz,  $\text{CDCl}_3$ )  $\delta$  14.0, 14.0, 39.2, 42.3, 45.6, 61.8, 61.8, 66.3, 122.4, 125.5, 127.3, 129.0, 131.1, 133.7, 135.1, 143.7, 167.0, 171.0, 196.9; HRMS (ESI) calcd for  $\text{C}_{19}\text{H}_{21}\text{O}_5$  ( $\text{M} + \text{H}$ ) $^+$  329.1389, found 329.1392.

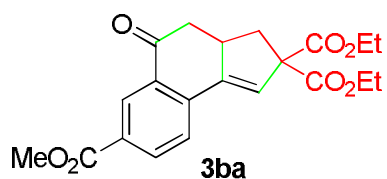

Compound **3ba**. 76% yield (73 mg); colorless oil;  $^1\text{H}$  NMR (600 MHz,  $\text{CDCl}_3$ )  $\delta$  1.24–1.30 (m, 6H), 2.12 (dd,  $J$  = 8.4, 13.3 Hz, 1H), 2.49 (dd,  $J$  = 13.9, 15.8 Hz, 1H), 2.90–3.10 (m, 2H),

3.42–3.59 (m, 1H), 3.91 (s, 3H), 4.13–4.26 (m, 4H), 6.48 (d,  $J = 2.3$  Hz, 1H), 7.72–7.80 (m, 1H), 8.14–8.18 (m, 1H), 8.58–8.61 (m, 1H);  $^{13}\text{C}$  NMR (151 MHz,  $\text{CDCl}_3$ )  $\delta$  13.9, 13.9, 39.1, 42.0, 45.3, 52.2, 61.8, 61.9, 66.3, 125.0, 125.7, 128.8, 130.5, 130.9, 133.9, 138.6, 142.8, 165.8, 169.5, 170.5, 195.8; HRMS (ESI) calcd for  $\text{C}_{21}\text{H}_{23}\text{O}_7$  ( $\text{M} + \text{H}$ ) $^+$  387.1444, found 387.1437.

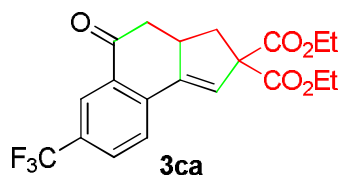

Compound **3ca**. 75% yield (74 mg); white solid, mp 97–99°C;  $^1\text{H}$  NMR (600 MHz,  $\text{CDCl}_3$ )  $\delta$  1.26–1.33 (m, 6H), 2.16 (dd,  $J = 8.3, 13.3$  Hz, 1H), 2.53 (dd,  $J = 13.9, 15.9$  Hz, 1H), 3.04–3.12 (m, 2H), 3.51–3.59 (m, 1H), 4.18–4.30 (m, 4H), 6.51 (d,  $J = 2.4$  Hz, 1H), 7.75–7.85 (m, 2H), 8.28 (s, 1H);  $^{13}\text{C}$  NMR (151 MHz,  $\text{CDCl}_3$ )  $\delta$  14.0, 14.0, 39.1, 42.1, 45.3, 62.0, 62.0, 66.4, 123.5 (q,  $J = 272.6$  Hz), 124.7 (q,  $J = 3.9$  Hz), 125.2, 126.2, 129.8 (q,  $J = 3.4$  Hz), 131.1 (q,  $J = 33.2$  Hz), 131.2, 138.0, 142.4, 169.6, 170.6, 195.5;  $^{19}\text{F}$  NMR (565 MHz,  $\text{CDCl}_3$ )  $\delta$  –63.0; HRMS (ESI) calcd for  $\text{C}_{20}\text{H}_{20}\text{F}_3\text{O}_5$  ( $\text{M} + \text{H}$ ) $^+$  397.1263, found 397.1255.

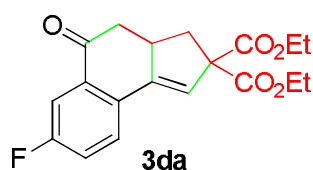

Compound **3da**. 81% yield (70 mg); white solid, mp 96–98°C;  $^1\text{H}$  NMR (600 MHz,  $\text{CDCl}_3$ )  $\delta$  1.26–1.33 (m, 6H), 2.13 (dd,  $J = 8.4, 13.3$  Hz, 1H), 2.50 (dd,  $J = 13.9, 15.8$  Hz, 1H), 3.01–3.10 (m, 2H), 3.49–3.58 (m, 1H), 4.19–4.30 (m, 4H), 6.33 (d,  $J = 2.2$  Hz, 1H), 7.26–7.30 (m, 1H), 7.60–7.74 (m, 2H);  $^{13}\text{C}$  NMR (151 MHz,  $\text{CDCl}_3$ )  $\delta$  14.0, 14.0, 39.1, 42.3, 45.3, 61.8, 61.9, 66.2, 113.3 (d,  $J = 22.4$  Hz), 121.3 (d,  $J = 22.9$  Hz), 122.2 (d,  $J = 2.1$  Hz), 127.8 (d,  $J = 7.6$  Hz), 131.5 (d,  $J = 3.2$  Hz), 133.0 (d,  $J = 6.5$  Hz), 142.6 (d,  $J = 1.0$  Hz), 162.9 (d,  $J = 251.1$  Hz), 169.9, 170.9, 195.8;  $^{19}\text{F}$  NMR (565 MHz,  $\text{CDCl}_3$ )  $\delta$  –110.2; HRMS (ESI) calcd for  $\text{C}_{19}\text{H}_{20}\text{FO}_5$  ( $\text{M} + \text{H}$ ) $^+$  347.1295, found 347.1293.

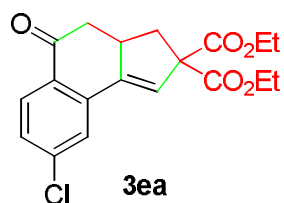

Compound **3ea**. 76% yield (69 mg); white solid, mp 141–143°C;  $^1\text{H}$  NMR (600 MHz,  $\text{CDCl}_3$ )  $\delta$

1.27–1.32 (m, 6H), 2.12 (dd,  $J = 8.3, 13.3$  Hz, 1H), 2.48 (dd,  $J = 13.9, 15.8$  Hz, 1H), 2.95–3.08 (m, 2H), 3.46–3.57 (m, 1H), 4.17–4.29 (m, 4H), 6.40 (d,  $J = 2.3$  Hz, 1H), 7.37 (dd,  $J = 1.9, 8.4$  Hz, 1H), 7.67 (d,  $J = 1.9$  Hz, 1H), 7.95 (d,  $J = 8.4$  Hz, 1H);  $^{13}\text{C}$  NMR (151 MHz,  $\text{CDCl}_3$ )  $\delta$  14.0, 14.0, 39.2, 42.3, 45.4, 61.9, 61.9, 66.3, 123.9, 125.3, 129.1, 129.3, 129.4, 136.5, 140.1, 142.6, 169.8, 170.7, 195.8; HRMS (ESI) calcd for  $\text{C}_{19}\text{H}_{20}\text{ClO}_5$  ( $\text{M} + \text{H}$ ) $^+$  363.0999, found 363.0995.

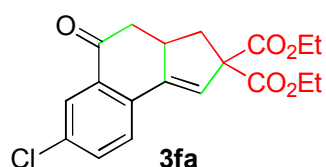

Compound **3fa**. 80% yield (73 mg); white solid, mp 136–138°C;  $^1\text{H}$  NMR (600 MHz,  $\text{CDCl}_3$ )  $\delta$  1.26–1.32 (m, 6H), 2.12 (dd,  $J = 8.4, 13.3$  Hz, 1H), 2.48 (dd,  $J = 13.9, 15.8$  Hz, 1H), 2.98–3.09 (m, 2H), 3.46–3.56 (m, 1H), 4.15–4.30 (m, 4H), 6.37 (d,  $J = 2.3$  Hz, 1H), 7.51 (dd,  $J = 2.3, 8.4$  Hz, 1H), 7.64 (d,  $J = 8.4$  Hz, 1H), 7.96 (d,  $J = 2.2$  Hz, 1H);  $^{13}\text{C}$  NMR (151 MHz,  $\text{CDCl}_3$ )  $\delta$  14.0, 14.0, 39.1, 42.2, 45.3, 61.8, 61.9, 66.3, 123.1, 127.1, 127.1, 132.1, 133.4, 133.6, 135.3, 142.6, 169.8, 170.7, 195.6; HRMS (ESI) calcd for  $\text{C}_{19}\text{H}_{20}\text{ClO}_5$  ( $\text{M} + \text{H}$ ) $^+$  363.0999, found 363.0988.

Crystal data for **3fa** ( $\text{C}_{19}\text{H}_{19}\text{ClO}_5$ , 362.79): triclinic, space group  $P\bar{1}$ ,  $a = 7.9475(16)$  Å,  $b = 10.528(2)$  Å,  $c = 11.586(3)$  Å,  $U = 911.0(3)$  Å $^3$ ,  $Z = 2$ ,  $T = 296(2)$  K, absorption coefficient 0.235  $\text{mm}^{-1}$ , reflections collected 30570, independent reflections 3197 [ $R(\text{int}) = 0.047$ ], refinement by full-matrix least-squares on  $F^2$ , data/restraints/parameters 4195/0/214, goodness-of-fit on  $F^2 = 1.042$ , final  $R$  indices [ $I > 2\sigma(I)$ ]  $R_1 = 0.0619$ ,  $wR_2 = 0.1631$ ,  $R$  indices (all data)  $R_1 = 0.0832$ ,  $wR_2 = 0.1874$ , largest diff. peak and hole 0.376 and  $-0.358\text{e}^{-3}$  Å $^{-3}$ . Crystallographic data for the structure **3fa** have been deposited with the Cambridge Crystallographic Data Centre as supplementary publication No. CCDC1439849.

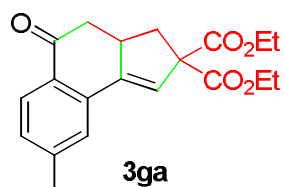

Compound **3ga**. 81% yield (69 mg); white solid, mp 91–93°C;  $^1\text{H}$  NMR (400 MHz,  $\text{CDCl}_3$ )  $\delta$  1.26–1.33 (m, 6H), 2.11 (dd,  $J = 8.4, 13.3$  Hz, 1H), 2.40–2.51 (m, 4H), 2.91–3.10 (m, 2H), 3.40–3.60 (m, 1H), 4.15–4.30 (m, 4H), 6.35 (d,  $J = 2.3$  Hz, 1H), 7.22 (d,  $J = 8.0$  Hz, 1H), 7.50 (s, 1H), 7.91 (d,  $J = 8.0$  Hz, 1H);  $^{13}\text{C}$  NMR (100 MHz,  $\text{CDCl}_3$ )  $\delta$  14.0, 14.0, 21.7, 39.2, 42.4, 45.6,

61.7, 61.8, 66.2, 122.1, 125.7, 127.4, 128.9, 130.1, 135.1, 143.8, 144.5, 170.0, 171.0, 196.7;  
HRMS (ESI) calcd for C<sub>20</sub>H<sub>23</sub>O<sub>5</sub> (M + H)<sup>+</sup> 343.1545, found 343.1538.

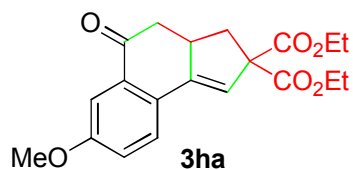

Compound **3ha**. 90% yield (81 mg); white solid, mp 101–103°C; <sup>1</sup>H NMR (600 MHz, CDCl<sub>3</sub>) δ 1.25–1.32 (m, 6H), 2.09 (dd, *J* = 8.6, 13.2 Hz, 1H), 2.48 (dd, *J* = 13.8, 15.7 Hz, 1H), 2.95–3.10 (m, 2H), 3.46–3.55 (m, 1H), 3.87 (s, 3H), 4.13–4.30 (m, 4H), 6.23 (d, *J* = 2.3 Hz, 1H), 7.13 (dd, *J* = 2.8, 8.6 Hz, 1H), 7.46 (d, *J* = 2.8 Hz, 1H), 7.62 (d, *J* = 8.6 Hz, 1H); <sup>13</sup>C NMR (151 MHz, CDCl<sub>3</sub>) δ 14.0, 14.0, 39.2, 42.4, 45.5, 55.5, 61.7, 61.7, 66.2, 108.9, 120.3, 122.2, 127.1, 128.5, 132.3, 143.3, 160.2, 170.2, 171.1, 196.9; HRMS (ESI) calcd for C<sub>20</sub>H<sub>23</sub>O<sub>6</sub> (M + H)<sup>+</sup> 359.1495, found 359.1489.

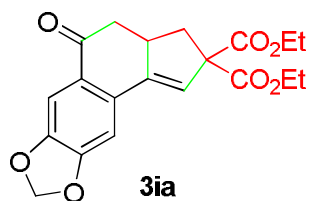

Compound **3ia**. 84% yield (78 mg); white solid, mp 135–137°C; <sup>1</sup>H NMR (400 MHz, CDCl<sub>3</sub>) δ 1.24–1.31 (m, 6H), 2.08 (dd, *J* = 8.5, 13.3 Hz, 1H), 2.43 (dd, *J* = 13.7, 15.8 Hz, 1H), 2.90–3.10 (m, 2H), 3.40–3.53 (m, 1H), 4.15–4.30 (m, 4H), 6.04 (s, 2H), 6.22 (d, *J* = 2.3 Hz, 1H), 7.05 (s, 1H), 7.41 (s, 1H); <sup>13</sup>C NMR (100 MHz, CDCl<sub>3</sub>) δ 14.0, 14.0, 39.2, 42.4, 45.2, 61.7, 61.8, 66.1, 101.9, 104.4, 106.2, 121.4, 127.0, 132.1, 143.7, 148.9, 152.3, 170.0, 171.0, 195.3; HRMS (ESI) calcd for C<sub>20</sub>H<sub>21</sub>O<sub>7</sub> (M + H)<sup>+</sup> 373.1287, found 373.1293.

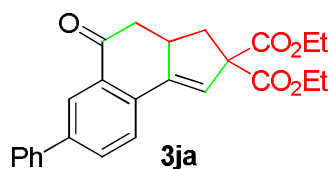

Compound **3ja**. 73% yield (74 mg); white solid, mp 81–83°C; <sup>1</sup>H NMR (600 MHz, CDCl<sub>3</sub>) δ 1.26–1.33 (m, 6H), 2.14 (dd, *J* = 8.5, 13.2 Hz, 1H), 2.54 (dd, *J* = 14.0, 15.5 Hz, 1H), 3.02–3.10 (m, 2H), 3.52–3.59 (m, 1H), 4.19–4.29 (m, 4H), 6.41 (d, *J* = 2.3 Hz, 1H), 7.39 (d, *J* = 7.3 Hz, 1H), 7.46 (t, *J* = 7.7 Hz, 2H), 7.64 (d, *J* = 7.4 Hz, 2H), 7.75–7.83 (m, 2H), 8.26 (d, *J* = 1.8 Hz, 1H); <sup>13</sup>C NMR (151 MHz, CDCl<sub>3</sub>) δ 14.0, 14.1, 39.3, 42.3, 45.7, 61.8, 61.9, 66.3, 122.4, 125.6, 126.1,

127.0, 128.0, 128.9, 131.4, 132.2, 133.9, 139.5, 141.8, 143.4, 170.0, 171.0, 197.0; HRMS (ESI) calcd for C<sub>25</sub>H<sub>25</sub>O<sub>5</sub> (M + H)<sup>+</sup> 405.1702, found 405.1693.

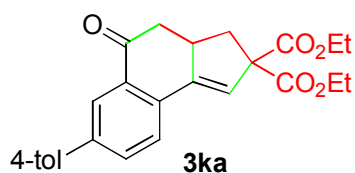

Compound **3ka**. 79% yield (83 mg); white solid, mp 87–89°C; <sup>1</sup>H NMR (600 MHz, CDCl<sub>3</sub>) δ 1.26–1.33 (m, 6H), 2.13 (dd, *J* = 8.5, 13.2 Hz, 1H), 2.40 (s, 3H), 2.50–2.56 (m, 1H), 3.00–3.10 (m, 2H), 3.52–3.59 (m, 1H), 4.17–4.29 (m, 4H), 6.39 (d, *J* = 2.0 Hz, 1H), 7.27 (d, *J* = 6.9 Hz, 2H), 7.54 (d, *J* = 8.0 Hz, 2H), 7.72–7.82 (m, 2H), 8.24 (d, *J* = 1.5 Hz, 1H); <sup>13</sup>C NMR (151 MHz, CDCl<sub>3</sub>) δ 14.0, 14.1, 21.1, 39.2, 42.3, 45.7, 61.8, 61.8, 66.3, 122.2, 125.2, 126.1, 126.8, 129.6, 131.4, 131.9, 133.7, 136.6, 137.9, 141.7, 143.5, 170.0, 171.0, 197.0; HRMS (ESI) calcd for C<sub>26</sub>H<sub>27</sub>O<sub>5</sub> (M + H)<sup>+</sup> 419.1858, found 419.1850.

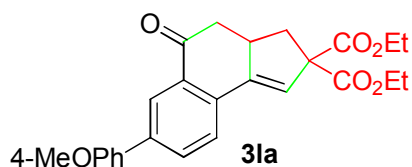

Compound **3la**. 83% yield (90 mg); white solid, mp 99–101°C; <sup>1</sup>H NMR (600 MHz, CDCl<sub>3</sub>) δ 1.26–1.33 (m, 6H), 2.13 (dd, *J* = 8.5, 13.2 Hz, 1H), 2.53 (dd, *J* = 13.9, 15.6 Hz, 1H), 3.00–3.09 (m, 2H), 3.52–3.59 (m, 1H), 3.86 (s, 3H), 4.16–4.29 (m, 4H), 6.38 (d, *J* = 2.3 Hz, 1H), 6.90–7.01 (m, 2H), 7.57–7.60 (m, 2H), 7.70–7.80 (m, 2H), 8.20–8.22 (m, 1H); <sup>13</sup>C NMR (151 MHz, CDCl<sub>3</sub>) δ 14.0, 14.0, 39.3, 42.4, 45.7, 55.4, 61.8, 61.8, 66.3, 114.4, 122.1, 124.9, 126.1, 128.1, 131.4, 131.7, 132.0, 133.4, 141.5, 143.5, 159.7, 170.1, 171.0, 197.1; HRMS (ESI) calcd for C<sub>26</sub>H<sub>27</sub>O<sub>6</sub> (M + H)<sup>+</sup> 435.1808, found 435.1799.

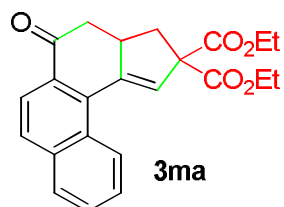

Compound **3ma**. 72% yield (68 mg); white solid, mp 133–135°C; <sup>1</sup>H NMR (600 MHz, CDCl<sub>3</sub>) δ 1.27 (t, *J* = 7.1 Hz, 3H), 1.37 (t, *J* = 7.1 Hz, 3H), 2.49 (dd, *J* = 4.3, 14.2 Hz, 1H), 2.72 (dd, *J* = 13.4, 16.5 Hz, 1H), 2.90 (dd, *J* = 8.7, 14.2 Hz, 1H), 3.15 (dd, *J* = 5.8, 16.5 Hz, 1H), 3.60–3.68 (m,

1H), 4.18–4.40 (m, 4H), 6.50 (d,  $J = 1.5$  Hz, 1H), 7.60–7.65 (m, 2H), 7.80–7.89 (m, 2H), 8.00–8.10 (m, 1H), 8.56–8.60 (m, 1H);  $^{13}\text{C}$  NMR (151 MHz,  $\text{CDCl}_3$ )  $\delta$  14.0, 14.1, 36.4, 45.8, 47.4, 61.9, 62.0, 67.8, 122.7, 127.0, 127.4, 127.7, 128.6, 128.7, 128.9, 129.6, 129.6, 136.0, 136.3, 142.3, 170.8, 171.1, 197.0; HRMS (ESI) calcd for  $\text{C}_{23}\text{H}_{23}\text{O}_5$  ( $\text{M} + \text{H}$ ) $^+$  379.1545, found 379.1547.

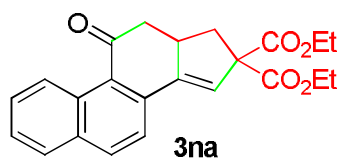

Compound **3na**. 74% yield (70 mg); white solid, mp 151–153°C;  $^1\text{H}$  NMR (600 MHz,  $\text{CDCl}_3$ )  $\delta$  1.27–1.33 (m, 6H), 2.16 (dd,  $J = 8.5, 13.1$  Hz, 1H), 2.72 (t,  $J = 14.1$  Hz, 1H), 3.01–3.10 (m, 2H), 3.60–3.70 (m, 1H), 4.15–4.30 (m, 4H), 6.48 (d,  $J = 2.2$  Hz, 1H), 7.50–7.53 (m, 1H), 7.61–7.64 (m, 1H), 7.72–7.81 (m, 2H), 7.95–7.97 (m, 1H), 9.30–9.33 (m, 1H);  $^{13}\text{C}$  NMR (151 MHz,  $\text{CDCl}_3$ )  $\delta$  14.0, 14.0, 39.1, 42.8, 47.9, 61.8, 61.9, 66.3, 122.6, 123.7, 126.1, 126.8, 127.1, 128.3, 129.1, 130.7, 133.9, 134.4, 135.9, 145.1, 169.9, 170.9, 199.7; HRMS (ESI) calcd for  $\text{C}_{23}\text{H}_{23}\text{O}_5$  ( $\text{M} + \text{H}$ ) $^+$  379.1545, found 379.1548.

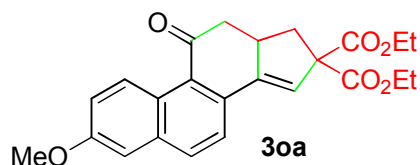

Compound **3oa**. 78% yield (80 mg); white solid, mp 176–178°C;  $^1\text{H}$  NMR (600 MHz,  $\text{CDCl}_3$ )  $\delta$  1.27–1.33 (m, 6H), 2.14 (dd,  $J = 8.5, 13.1$  Hz, 1H), 2.71 (t,  $J = 14.1$  Hz, 1H), 3.00–3.08 (m, 2H), 3.60–3.67 (m, 1H), 3.93 (s, 3H), 4.17–4.29 (m, 4H), 6.42 (d,  $J = 2.2$  Hz, 1H), 7.11 (d,  $J = 2.7$  Hz, 1H), 7.26–7.29 (m, 1H), 7.72 (d,  $J = 8.6$  Hz, 1H), 7.87 (d,  $J = 8.6$  Hz, 1H), 9.25 (d,  $J = 9.5$  Hz, 1H);  $^{13}\text{C}$  NMR (151 MHz,  $\text{CDCl}_3$ )  $\delta$  14.0, 14.1, 39.1, 42.8, 48.0, 55.2, 61.8, 61.8, 66.3, 106.9, 121.0, 122.6, 123.3, 125.9, 126.2, 128.8, 133.2, 133.8, 135.7, 145.1, 158.0, 170.0, 171.0, 199.9; HRMS (ESI) calcd for  $\text{C}_{24}\text{H}_{25}\text{O}_6$  ( $\text{M} + \text{H}$ ) $^+$  409.1651, found 409.1642.

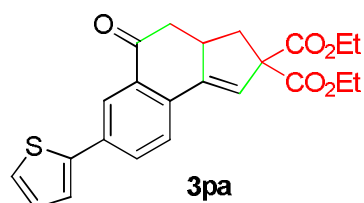

Compound **3pa**. 68% yield (70 mg); white solid, mp 133–135°C;  $^1\text{H}$  NMR (600 MHz,  $\text{CDCl}_3$ )  $\delta$  1.26–1.33 (m, 6H), 2.12 (dd,  $J = 8.5, 13.2$  Hz, 1H), 2.49–2.55 (m, 1H), 3.00–3.09 (m, 2H), 3.50–3.57 (m, 1H), 4.16–4.30 (m, 4H), 6.38 (d,  $J = 2.1$  Hz, 1H), 7.11 (dd,  $J = 3.7, 5.0$  Hz, 1H),

7.34 (d,  $J = 5.1$  Hz, 1H), 7.42 (d,  $J = 3.6$  Hz, 1H), 7.70 (d,  $J = 8.2$  Hz, 1H), 7.79 (dd,  $J = 1.8, 8.2$  Hz, 1H), 8.23 (d,  $J = 1.8$  Hz, 1H);  $^{13}\text{C}$  NMR (151 MHz,  $\text{CDCl}_3$ )  $\delta$  14.0, 14.1, 39.2, 42.3, 45.6, 61.8; 61.9, 66.3, 122.4, 124.0, 124.1, 125.8, 126.2, 128.3, 130.7, 131.4, 133.8, 135.2, 142.8, 143.3, 167.0, 171.0, 196.8; HRMS (ESI) calcd for  $\text{C}_{23}\text{H}_{23}\text{O}_5\text{S}$  ( $\text{M} + \text{H}$ ) $^+$  411.1266, found 411.1258.

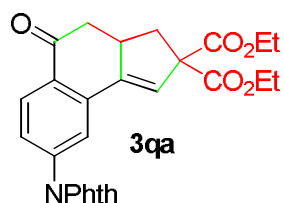

Compound **3qa**. 64% yield (76 mg); white solid, mp 64–66°C;  $^1\text{H}$  NMR (600 MHz,  $\text{CDCl}_3$ )  $\delta$  1.26–1.34 (m, 6H), 2.16 (dd,  $J = 8.3, 13.3$  Hz, 1H), 2.55 (dd,  $J = 13.9, 15.8$  Hz, 1H), 2.99–3.13 (m, 2H), 3.54–3.62 (m, 1H), 4.16–4.31 (m, 4H), 6.44 (d,  $J = 2.3$  Hz, 1H), 7.58 (dd,  $J = 2.0, 8.4$  Hz, 1H), 7.86 (dd,  $J = 3.1, 5.3$  Hz, 3H), 8.01 (dd,  $J = 3.0, 5.4$  Hz, 2H), 8.17 (d,  $J = 8.4$  Hz, 1H);  $^{13}\text{C}$  NMR (151 MHz,  $\text{CDCl}_3$ )  $\delta$  14.0, 14.1, 39.2, 42.3, 45.5, 61.9, 61.9, 66.4, 122.9, 123.7, 124.0, 126.5, 128.5, 130.0, 131.5, 134.8, 136.1, 136.5, 142.9, 166.7, 169.8, 170.8, 196.0; HRMS (ESI) calcd for  $\text{C}_{27}\text{H}_{24}\text{NO}_7$  ( $\text{M} + \text{H}$ ) $^+$  474.1553, found 474.1552.

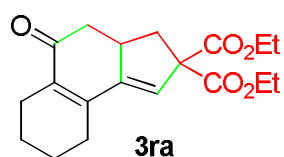

Compound **3ra**. 80% yield (66 mg); colorless oil;  $^1\text{H}$  NMR (600 MHz,  $\text{CDCl}_3$ )  $\delta$  1.24–1.30 (m, 6H), 1.51–1.63 (m, 2H), 1.70–1.80 (m, 2H), 1.96 (dd,  $J = 9.2, 13.1$  Hz, 1H), 2.16–2.21 (m, 1H), 2.28 (dd,  $J = 13.6, 15.7$  Hz, 1H), 2.30–2.50 (m, 2H), 2.52–2.57 (m, 1H), 2.77 (dd,  $J = 5.9, 15.7$  Hz, 1H), 2.93 (dd,  $J = 7.1, 13.1$  Hz, 1H), 3.29–3.36 (m, 1H), 4.13–4.27 (m, 4H), 5.98 (d,  $J = 1.7$  Hz, 1H);  $^{13}\text{C}$  NMR (151 MHz,  $\text{CDCl}_3$ )  $\delta$  14.0, 14.0, 21.5, 21.6, 22.9, 26.9, 39.3, 41.6, 44.6, 61.7, 61.8, 66.0, 123.3, 135.5, 145.2, 145.7, 169.9, 171.0, 198.1; HRMS (ESI) calcd for  $\text{C}_{19}\text{H}_{25}\text{O}_5$  ( $\text{M} + \text{H}$ ) $^+$  333.1702, found 333.1697.

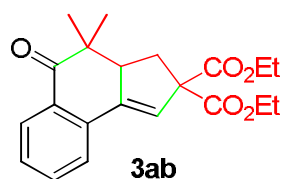

Compound **3ab**. 92% yield (82 mg); white solid, mp 86–88°C;  $^1\text{H}$  NMR (400 MHz,  $\text{CDCl}_3$ )  $\delta$  0.94 (s, 3H), 1.24 (s, 3H), 1.26–1.33 (m, 6H), 2.35 (dd,  $J = 8.2, 13.8$  Hz, 1H), 2.80 (dd,  $J = 8.2, 13.8$



Hz, 1H), 3.34–3.39 (m, 1H), 4.16–4.31 (m, 4H), 6.39 (d,  $J = 2.4$  Hz, 1H), 7.38–7.44 (m, 1H), 7.51–7.56 (m, 1H), 7.66–7.70 (m, 1H), 7.97–8.01 (m, 1H);  $^{13}\text{C}$  NMR (100 MHz,  $\text{CDCl}_3$ )  $\delta$  14.0, 14.0, 18.9, 21.8, 31.9, 45.9, 51.9, 61.7, 61.8, 66.3, 122.8, 125.0, 128.2, 129.2, 129.9, 133.1, 134.3, 142.4, 170.3, 171.0, 202.5; HRMS (ESI) calcd for  $\text{C}_{21}\text{H}_{25}\text{O}_5$  ( $\text{M} + \text{H}$ ) $^+$  357.1702, found 357.1697.

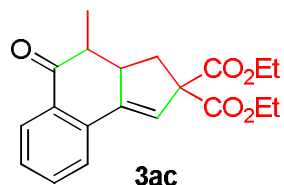

Compound **3ac**. 80% yield (69 mg); colorless oil; dr = 88:12;  $^1\text{H}$  NMR (600 MHz,  $\text{CDCl}_3$ ) date of the major isomer  $\delta$  1.25–1.33 (m, 9H), 2.14 (dd,  $J = 8.5, 13.1$  Hz, 1H), 2.44–2.52 (m, 1H), 3.07 (dd,  $J = 7.2, 13.1$  Hz, 1H), 3.15–3.21 (m, 1H), 4.15–4.31 (m, 4H), 6.39 (d,  $J = 2.4$  Hz, 1H), 7.38–7.44 (m, 1H), 7.53–7.56 (m, 1H), 7.67–7.71 (m, 1H), 7.97–8.01 (m, 1H);  $^{13}\text{C}$  NMR (151 MHz,  $\text{CDCl}_3$ ) date of the major isomer  $\delta$  12.4, 14.0, 14.0, 38.5, 49.0, 49.1, 61.8, 61.8, 66.0, 122.2, 125.3, 127.5, 129.0, 131.3, 133.3, 134.7, 143.6, 170.0, 171.0, 199.1; HRMS (ESI) calcd for  $\text{C}_{20}\text{H}_{23}\text{O}_5$  ( $\text{M} + \text{H}$ ) $^+$  343.1545, found 343.1540.

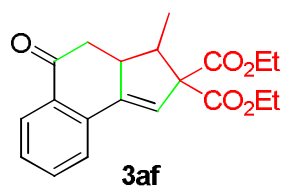

Compound **3af**. 39% yield (33 mg); colorless oil; dr = 61:39;  $^1\text{H}$  NMR (600 MHz,  $\text{CDCl}_3$ ) date of the major isomer  $\delta$  1.22–1.36 (m, 9H), 2.45 (dd,  $J = 13.8, 15.4$  Hz, 1H), 2.62–2.78 (m, 1H), 3.02 (dd,  $J = 5.5, 15.5$  Hz, 1H), 3.08–3.17 (m, 1H), 4.13–4.35 (m, 4H), 6.40 (d,  $J = 2.2$  Hz, 1H), 7.37–7.43 (m, 1H), 7.53–7.58 (m, 1H), 7.71 (t,  $J = 8.5$  Hz, 1H), 7.96–8.01 (m, 1H);  $^{13}\text{C}$  NMR (151 MHz,  $\text{CDCl}_3$ ) date of the major isomer  $\delta$  13.9, 14.1, 14.2, 44.1, 47.9, 48.8, 61.6, 61.6, 69.5, 123.1, 125.2, 127.3, 129.0, 131.1, 133.7, 135.1, 143.4, 169.3, 170.5, 197.2; HRMS (ESI) calcd for  $\text{C}_{20}\text{H}_{22}\text{NaO}_5$  ( $\text{M} + \text{Na}$ ) $^+$  365.1365, found 365.1358.

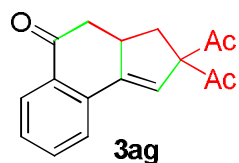

Compound **3ag**. 76% yield (51 mg); colorless oil;  $^1\text{H}$  NMR (600 MHz,  $\text{CDCl}_3$ )  $\delta$  1.92 (dd,  $J = 8.5, 13.0$  Hz, 1H), 2.22 (s, 3H), 2.23 (s, 3H), 2.46 (dd,  $J = 13.8, 15.7$  Hz, 1H), 3.02 (dd,  $J = 5.5, 15.7$

Hz, 1H), 3.14 (dd,  $J = 7.3, 13.0$  Hz, 1H), 3.37–3.44 (m, 1H), 6.56 (d,  $J = 2.4$  Hz, 1H), 7.42–7.45 (m, 1H), 7.55–7.60 (m, 1H), 7.70 (d,  $J = 7.5$  Hz, 1H), 8.02 (dd,  $J = 1.0, 7.9$  Hz, 1H);  $^{13}\text{C}$  NMR (151 MHz,  $\text{CDCl}_3$ )  $\delta$  27.0, 27.1, 37.1, 42.1, 45.7, 80.9, 122.0, 125.3, 127.5, 129.3, 131.2, 133.8, 134.8, 144.3, 196.6, 202.8, 205.2; HRMS (ESI) calcd for  $\text{C}_{17}\text{H}_{17}\text{O}_3$  ( $\text{M} + \text{H}$ ) $^+$  269.1178, found 269.1172.

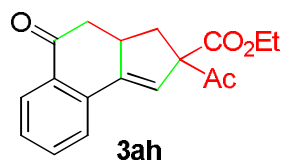

Compound **3ah**. 78% yield (58 mg); colorless oil; dr = 55:45;  $^1\text{H}$  NMR (600 MHz,  $\text{CDCl}_3$ ) date of the major isomer  $\delta$  1.27–1.33 (m, 6H), 2.05–2.11 (m, 1H), 2.27 (s, 3H), 2.43–2.53 (m, 1H), 2.98–3.08 (m, 2H), 3.37–3.46 (m, 1H), 4.20–4.29 (m, 2H), 6.42 (d,  $J = 2.4$  Hz, 1H), 7.42 (t,  $J = 7.6$  Hz, 1H), 7.57 (t,  $J = 7.5$  Hz, 1H), 7.70 (t,  $J = 8.0$  Hz, 1H), 8.01 (d,  $J = 7.9$  Hz, 1H);  $^{13}\text{C}$  NMR (151 MHz,  $\text{CDCl}_3$ ) date of the major isomer  $\delta$  14.1, 26.6, 37.8, 42.2, 45.7, 61.9, 73.2, 122.2, 125.3, 127.4, 129.2, 131.1, 133.7, 135.0, 144.4, 170.4, 196.8, 201.3; HRMS (ESI) calcd for  $\text{C}_{18}\text{H}_{19}\text{O}_4$  ( $\text{M} + \text{H}$ ) $^+$  299.1283, found 299.1277.

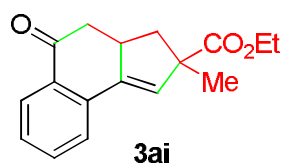

Compound **3ai**. 80% yield (54 mg); colorless oil; dr = 60:40;  $^1\text{H}$  NMR (600 MHz,  $\text{CDCl}_3$ ) date of the major isomer  $\delta$  1.26 (t,  $J = 7.1$  Hz, 3H), 1.53 (s, 3H), 2.21 (dd,  $J = 8.7, 12.8$  Hz, 1H), 2.42–2.54 (m, 1H), 2.95–3.02 (m, 2H), 3.48–3.55 (m, 1H), 4.15 (q,  $J = 7.1$  Hz, 2H), 6.20 (d,  $J = 2.3$  Hz, 1H), 7.36–7.41 (m, 1H), 7.53–7.57 (m, 1H), 7.65–7.68 (m, 1H), 8.01 (d,  $J = 7.9$  Hz, 1H);  $^{13}\text{C}$  NMR (151 MHz,  $\text{CDCl}_3$ ) date of the major isomer  $\delta$  14.1, 25.5, 42.8, 43.6, 46.3, 55.5, 60.8, 125.2, 127.2, 128.4, 129.1, 131.0, 133.5, 135.8, 140.8, 175.6, 197.6; HRMS (ESI) calcd for  $\text{C}_{17}\text{H}_{19}\text{O}_3$  ( $\text{M} + \text{H}$ ) $^+$  271.1334, found 271.1327.

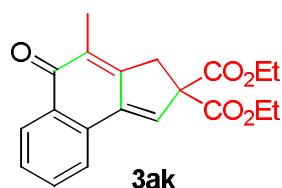

Compound **3ak**. 74% yield (63 mg); colorless oil;  $^1\text{H}$  NMR (600 MHz,  $\text{CDCl}_3$ )  $\delta$  1.32 (t,  $J = 7.1$  Hz, 6H), 2.10 (s, 3H), 3.55 (s, 2H), 4.22–4.33 (m, 4H), 7.14 (s, 1H), 7.52–7.61 (m, 2H), 7.88 (d,  $J$

= 7.6 Hz, 1H), 8.23 (d,  $J = 7.7$  Hz, 1H);  $^{13}\text{C}$  NMR (151 MHz,  $\text{CDCl}_3$ )  $\delta$  12.2, 14.0, 36.5, 62.5, 65.5, 124.3, 127.0, 128.7, 129.5, 130.4, 130.7, 131.4, 135.0, 138.4, 154.0, 169.1, 184.5; HRMS (ESI) calcd for  $\text{C}_{20}\text{H}_{21}\text{O}_5(\text{M} + \text{H})^+$  341.1389, found 341.1383.

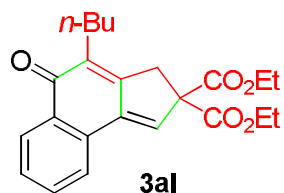

Compound **3al**. 70% yield (67 mg); colorless oil;  $^1\text{H}$  NMR (600 MHz,  $\text{CDCl}_3$ )  $\delta$  0.95 (t,  $J = 7.3$  Hz, 3H), 1.33 (t,  $J = 7.1$  Hz, 6H), 1.38–1.46 (m, 2H), 1.49–1.56 (m, 2H), 2.53–2.58 (m, 2H), 3.58 (s, 2H), 4.24–4.32 (m, 4H), 7.16 (s, 1H), 7.52–7.62 (m, 2H), 7.89 (d,  $J = 7.7$  Hz, 1H), 8.23 (d,  $J = 7.8$  Hz, 1H);  $^{13}\text{C}$  NMR (151 MHz,  $\text{CDCl}_3$ )  $\delta$  14.0, 14.0, 22.9, 26.9, 30.6, 36.2, 62.4, 65.5, 124.3, 127.0, 129.5, 130.4, 130.9, 131.4, 133.3, 134.9, 138.6, 153.9, 169.1, 184.0; HRMS (ESI) calcd for  $\text{C}_{23}\text{H}_{27}\text{O}_5(\text{M} + \text{H})^+$  383.1858, found 383.1840.

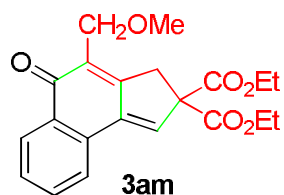

Compound **3am**. 53% yield (49 mg); colorless oil;  $^1\text{H}$  NMR (600 MHz,  $\text{CDCl}_3$ )  $\delta$  1.31 (t,  $J = 7.1$  Hz, 6H), 3.42 (s, 3H), 3.73 (s, 2H), 4.24–4.30 (m, 4H), 4.52 (s, 2H), 7.26 (s, 1H), 7.56 (t,  $J = 7.5$  Hz, 1H), 7.53–7.64 (m, 1H), 7.89 (d,  $J = 7.7$  Hz, 1H), 8.24 (d,  $J = 7.8$  Hz, 1H);  $^{13}\text{C}$  NMR (151 MHz,  $\text{CDCl}_3$ )  $\delta$  14.0, 36.4, 58.6, 62.5, 65.8, 66.3, 124.4, 127.2, 128.4, 129.7, 130.3, 130.6, 131.8, 137.2, 138.7, 158.0, 168.9, 183.5; HRMS (ESI) calcd for  $\text{C}_{21}\text{H}_{23}\text{O}_6(\text{M} + \text{H})^+$  371.1495, found 371.1486.

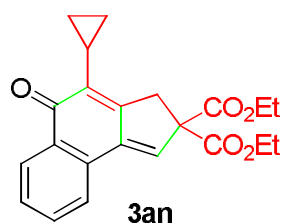

Compound **3an**. 35% yield (32 mg); colorless oil;  $^1\text{H}$  NMR (600 MHz,  $\text{CDCl}_3$ )  $\delta$  0.90–0.95 (m, 2H), 1.03–1.07 (m, 2H), 1.32 (t,  $J = 7.1$  Hz, 6H), 1.65–1.71 (m, 1H), 3.68 (s, 2H), 4.24–4.32 (m, 4H), 7.13 (s, 1H), 7.52 (t,  $J = 7.6$  Hz, 1H), 7.57 (t,  $J = 7.5$  Hz, 1H), 7.85 (d,  $J = 7.7$  Hz, 1H), 8.17 (d,  $J = 7.8$  Hz, 1H);  $^{13}\text{C}$  NMR (151 MHz,  $\text{CDCl}_3$ )  $\delta$  6.0, 10.5, 14.0, 36.5, 62.4, 65.5, 124.2, 126.8,

129.5, 130.1, 131.3, 131.3, 132.3, 134.5, 138.7, 154.9, 169.2, 184.3; HRMS (ESI) calcd for  $C_{22}H_{22}O_5$  ( $M + H$ )<sup>+</sup> 367.1545, found 367.1537.

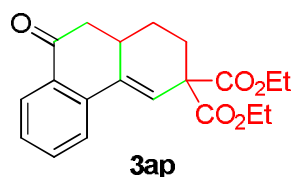

Compound **3ap**. 81% yield (69 mg); white solid, mp 158–161°C; <sup>1</sup>H NMR (600 MHz, CDCl<sub>3</sub>) δ 1.27–1.34 (m, 6H), 1.61–1.69 (m, 1H), 1.88–1.94(m, 1H), 2.00–2.14 (m, 1H), 2.39–2.46(m, 1H), 2.52–2.56 (m, 1H), 2.80–2.89 (m, 2H), 4.16–4.32 (m, 4H), 6.69 (s, 1H), 7.42 (t, *J* = 7.5 Hz, 1H), 7.55–7.62 (m, 1H), 7.77 (d, *J* = 8.0 Hz, 1H), 8.06 (d, *J* = 7.8 Hz, 1H); <sup>13</sup>C NMR (151 MHz, CDCl<sub>3</sub>) δ 14.0, 14.1, 27.2, 27.2, 34.7, 45.4, 55.6, 61.8, 61.9, 121.8, 124.8, 126.9, 128.5, 131.3, 133.8, 138.0, 140.1, 170.0, 170.8, 197.0; HRMS (ESI) calcd for  $C_{20}H_{23}O_5$  ( $M + H$ )<sup>+</sup> 343.1545, found 343.1542.

Crystal data for **3ap** ( $C_{20}H_{22}O_5$ , 342.38): triclinic, space group *P*-1, *a* = 8.1720(19) Å, *b* = 9.085(2) Å, *c* = 13.302(3) Å, *U* = 867.4(4) Å<sup>3</sup>, *Z* = 2, *T* = 296(2) K, absorption coefficient mm<sup>-1</sup>, reflections collected 5137, independent reflections 2385 [*R*(int) = 0.039], refinement by full-matrix least-squares on *F*<sup>2</sup>, data/restraints/parameters 3166/13/238, goodness-of-fit on *F*<sup>2</sup> = 1.076, final *R* indices [*I* > 2σ(*I*)] *R*<sub>1</sub> = 0.0687, *wR*<sub>2</sub> = 0.1835, *R* indices (all data) *R*<sub>1</sub> = 0.0787, *wR*<sub>2</sub> = 0.1891, largest diff. peak and hole 0.284 and -0.306 e<sup>-</sup> Å<sup>-3</sup>. Crystallographic data for the structure **3ap** have been deposited with the Cambridge Crystallographic Data Centre as supplementary publication No. CCDC1439850.

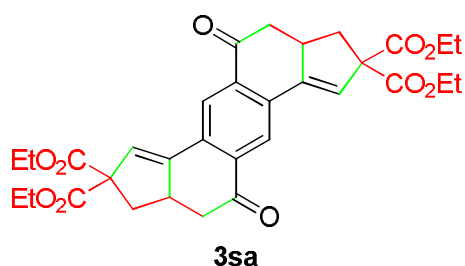

Compound **3sa**. It was prepared from **1s** and **2a** in 47% yield (68 mg) using the general procedure except that 6 equivalents of K<sub>2</sub>CO<sub>3</sub> was used; pale yellow solid, mp 59–61°C; <sup>1</sup>H NMR (600 MHz, CDCl<sub>3</sub>) δ 1.28–1.33 (m, 12H), 2.09–2.15 (m, 2H), 2.48–2.56 (m, 2H), 3.00–3.11 (m, 4H), 3.48–3.55 (m, 2H), 4.15–4.29 (m, 8H), 6.53 (dd, *J* = 2.3, 6.3 Hz, 2H), 8.32 (s, 2H); <sup>13</sup>C NMR (151 MHz, CDCl<sub>3</sub>) δ 14.0, 14.1, 14.4, 39.2, 39.2, 42.0, 42.0, 45.5, 45.6, 61.9, 61.9, 62.0, 62.0, 66.4,

66.4, 124.4, 124.5, 125.0, 125.1, 133.9, 134.0, 135.0, 135.0, 142.4, 169.7, 169.7, 170.7, 170.7, 196.4, 196.4; HRMS (ESI) calcd for C<sub>32</sub>H<sub>35</sub>O<sub>10</sub> (M + H)<sup>+</sup> 579.2230, found 579.2249.

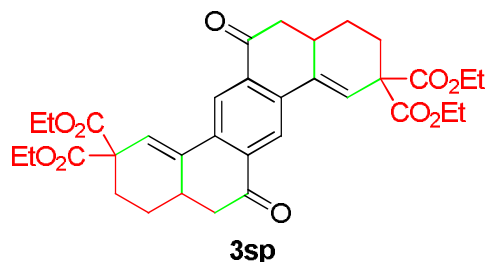

Compound **3sp**. It was prepared from **1s** and **2p** in 38% yield (58 mg) using the general procedure except that 6 equivalents of K<sub>2</sub>CO<sub>3</sub> was used; pale yellow solid, mp 66–68°C; <sup>1</sup>H NMR (600 MHz, CDCl<sub>3</sub>) δ 1.27–1.33 (m, 12H), 1.62–1.70 (m, 4H), 1.92–2.00 (m, 2H), 2.10–2.16 (m, 2H), 2.43–2.56 (m, 2H), 2.83–2.94 (m, 4H), 4.23 (d, *J* = 7.1 Hz, 2H), 4.30 (m, 6H), 6.75–2.86 (m, 2H), 8.42 (d, *J* = 5.9 Hz, 2H); <sup>13</sup>C NMR (151 MHz, CDCl<sub>3</sub>) δ 14.0, 14.0, 14.4, 27.2, 27.2, 34.4, 34.4, 45.3, 45.4, 55.8, 55.9, 61.9, 61.9, 62.0, 62.3, 123.0, 123.1, 123.8, 123.9, 134.3, 134.3, 136.7, 136.9, 139.2, 139.4, 167.0, 167.0, 170.5, 170.5, 196.7, 196.7; HRMS (ESI) calcd for C<sub>32</sub>H<sub>39</sub>O<sub>10</sub> (M + H)<sup>+</sup> 607.2543, found 607.2540.

#### Experimental Procedure for the Synthesis of **4a** from **1a** and **2a**:

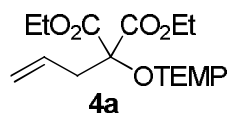

Compound **4a**. It was obtained from **1a** and **2a** under the reaction conditions in the presence of 2 equivalents of TEMPO in 51% yield (55 mg) as a colorless oil; <sup>1</sup>H NMR (600 MHz, CDCl<sub>3</sub>) δ 1.15 (d, *J* = 2.0 Hz, 6H), 1.21 (d, *J* = 1.9 Hz, 6H), 1.29 (td, *J* = 2.2, 7.1 Hz, 6H), 1.31–1.62 (m, 6H), 2.99 (d, *J* = 7.2 Hz, 2H), 4.16–4.25 (m, 4H), 5.05 (dd, *J* = 13.6, 22.2 Hz, 2H), 5.86–5.97 (m, 1H); <sup>13</sup>C NMR (151 MHz, CDCl<sub>3</sub>) δ 13.5, 13.5, 16.4, 20.2, 20.2, 32.7, 32.7, 38.3, 40.6, 40.6, 60.3, 60.6, 60.6, 88.1, 117.3, 132.8, 168.6; HRMS (ESI) calcd for C<sub>19</sub>H<sub>34</sub>NO<sub>5</sub> (M + H)<sup>+</sup> 356.2437, found 356.2433.

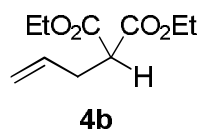

**Compound 4b<sup>1</sup>**. It was obtained from **1a** and **2a** under the reaction conditions in the presence of 2 equivalents of BHT in 35% yield (18 mg) as a colorless oil; <sup>1</sup>H NMR (600 MHz, CDCl<sub>3</sub>) δ 1.27 (t, *J* = 7.1 Hz, 6H), 2.65 (t, *J* = 7.2 Hz, 2H), 3.43 (t, *J* = 7.6 Hz, 1H), 4.16–4.24 (m, 4H), 5.03–5.17 (m, 2H), 5.72–5.83 (m, 1H); <sup>13</sup>C NMR (151 MHz, CDCl<sub>3</sub>) δ 14.0, 32.8, 51.6, 61.4, 117.5, 134.0, 168.9.

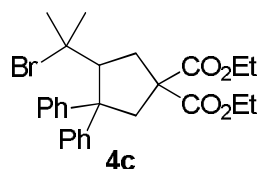

**Compound 4c**. It was obtained from **1a** and **2b** under the reaction conditions in the presence of 2 equivalents of 1,1-diphenylethylene in 68% yield (83 mg) as a colorless oil; <sup>1</sup>H NMR (600 MHz, CDCl<sub>3</sub>) δ 0.78 (s, 3H), 1.15 (t, *J* = 7.1 Hz, 3H), 1.25–1.32 (m, 6H), 2.05 (dd, *J* = 10.4, 13.3 Hz, 1H), 2.56 (dd, *J* = 7.6, 13.4 Hz, 1H), 2.95–3.01 (m, 2H), 3.21 (d, *J* = 14.7 Hz, 1H), 3.97 (q, *J* = 7.1 Hz, 2H), 4.23–4.33 (m, 2H), 7.08–7.38 (m, 10H); <sup>13</sup>C NMR (151 MHz, CDCl<sub>3</sub>) δ 13.9, 14.0, 23.9, 30.8, 37.8, 45.1, 50.5, 61.3, 61.4, 61.6, 62.7, 65.3, 123.0, 125.7, 126.6, 126.7, 127.0, 127.7, 128.0, 146.1, 148.8, 150.9, 171.3, 172.6; HRMS (ESI) calcd for C<sub>26</sub>H<sub>31</sub>O<sub>4</sub> (M – Br)<sup>+</sup> 407.2222, found 407.2222.

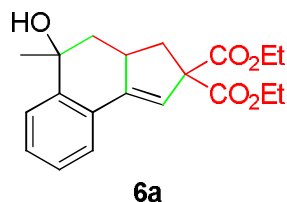

**Compound 6a**. 62% yield (53 mg); colorless oil; dr = 68:32; <sup>1</sup>H NMR (600 MHz, CDCl<sub>3</sub>) data of the major isomer δ 1.24–1.30 (m, 6H), 1.65 (s, 3H), 1.76 (m, 1H), 1.92–2.00 (m, 2H), 2.21–2.27 (m, 1H), 2.93–3.00 (m, 1H), 3.34–3.41 (m, 1H), 4.13–4.26 (m, 4H), 6.17–6.19 (d, *J* = 2.4 Hz, 1H), 7.25–7.34 (m, 2H), 7.55–7.59 (m, 1H), 7.62–7.66 (m, 1H); <sup>13</sup>C NMR (151 MHz, CDCl<sub>3</sub>) data of the major isomer δ 14.0, 29.7, 38.5, 41.4, 45.2, 61.5, 65.8, 70.3, 119.6, 125.6, 126.2, 127.9, 129.1, 140.7, 146.3, 170.6, 171.6; HRMS (ESI) calcd for C<sub>20</sub>H<sub>25</sub>O<sub>5</sub> (M + H)<sup>+</sup> 345.1702, found 345.1697.

#### Experimental Procedure for the Preparation of **6b** via Reduction of **3aa**:

<sup>1</sup>K.-T. Yip, N.-Y. Zhu and D. Yang, *Org. Lett.*, 2009, **11**, 1911.

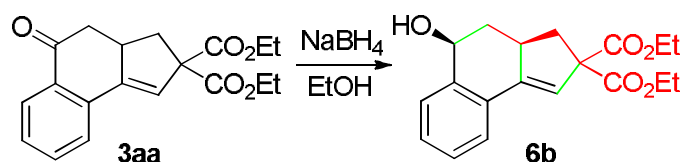

To a solution of **3aa** (164 mg, 0.5mmol) in 3 mL of EtOH was added NaBH<sub>4</sub> (28 mg, 0.75 mmol). After stirring at room temperature for 30 min, the reaction mixture was quenched with water, extracted with EtOAc, washed with brine, dried over anhydrous Na<sub>2</sub>SO<sub>4</sub>, and concentrated. Column chromatography on silica gel (EtOAc/petroleum ether = 1:5) gave 145 mg of **6b** (yield: 88%) as a colorless oil; the stereochemistry of **6b** was determined by the NOE measurements. <sup>1</sup>H NMR (600 MHz, CDCl<sub>3</sub>) δ 1.25–1.32 (m, 6H), 1.48–1.56 (m, 1H), 1.96–2.07 (m, 2H), 2.46–2.50 (m, 1H), 2.96 (dd, *J* = 7.0, 12.8 Hz, 1H), 3.15–3.23 (m, 1H), 4.14–4.30 (m, 4H), 4.89–4.92 (m, 1H), 6.19 (d, *J* = 2.3 Hz, 1H), 7.24–7.29 (m, 1H), 7.34 (t, *J* = 7.5 Hz, 1H), 7.65 (dd, *J* = 7.7, 15.7 Hz, 2H); <sup>13</sup>C NMR (151 MHz, CDCl<sub>3</sub>) δ 14.0, 14.1, 39.0, 40.5, 41.6, 61.5, 61.6, 65.7, 69.5, 119.0, 125.0, 126.3, 127.4, 128.9, 129.3, 140.4, 145.9, 170.4, 171.5; HRMS (ESI) calcd for C<sub>19</sub>H<sub>22</sub>NaO<sub>5</sub> (M + Na)<sup>+</sup> 353.1365, found 353.1371.

#### Experimental Procedure for the Synthesis of **3aj** from **3aa**:<sup>2</sup>

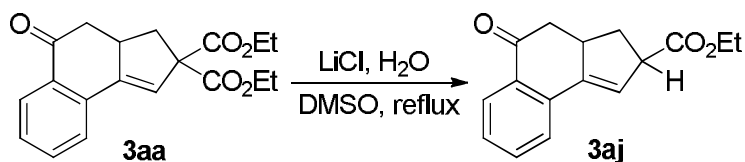

A mixture of **3aa** (164 mg, 0.5mmol), LiCl (63 mg, 1.5mmol), and H<sub>2</sub>O (0.25 mL) in 1 mL of dimethyl sulfoxide was heated at reflux for 5 h. After cooling to room temperature, the reaction mixture was quenched with water, extracted with EtOAc, washed with brine, dried over anhydrous Na<sub>2</sub>SO<sub>4</sub>, and concentrated. Column chromatography on silica gel (EtOAc/petroleum ether = 1:15) gave 103 mg of **3aj** (yield: 80%) as a colorless oil; dr = 54:46; <sup>1</sup>H NMR (600 MHz, CDCl<sub>3</sub>) data of the major isomer δ 1.28–1.35 (m, 3H), 1.91–2.00 (m, 1H), 2.56 (dd, *J* = 13.8, 15.7 Hz, 1H), 2.62–2.69 (m, 1H), 3.00–3.05 (m, 1H), 3.32–3.39 (m, 1H), 3.79–3.84 (m, 1H), 4.20–4.26 (m, 2H), 6.32–6.36 (m, 1H), 7.40 (dd, *J* = 7.1, 14.3 Hz, 1H), 7.53–7.58 (m, 1H), 7.65–7.73 (m, 1H), 8.00–8.05 (m, 1H); <sup>13</sup>C NMR (151 MHz, CDCl<sub>3</sub>) data of the major isomer δ 14.2, 34.6, 42.9, 46.0, 50.6, 61.0, 123.3, 125.0, 127.3, 128.5, 130.8, 133.6, 135.7, 141.6, 173.8, 197.6; HRMS (ESI)

<sup>2</sup>A. P. Krapcho, J. F. Weimaster, J. M. Eldridge, E. G. E. Jahngen, Jr., A. J. Lovey and W. P. Stephens, *J. Org. Chem.*, 1978, **43**, 138.

calcd for C<sub>16</sub>H<sub>17</sub>O<sub>3</sub> (M + H)<sup>+</sup> 257.1178, found 257.1174.

### Experimental Procedure for the Epoxidation of Tricyclic Ketones:

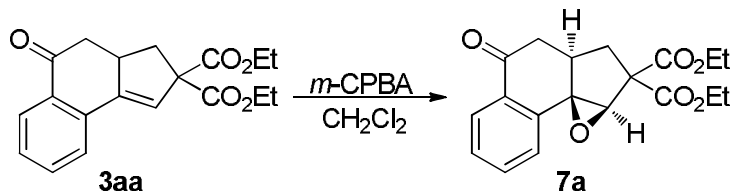

To a mixture of **3aa** (164 mg, 0.5 mmol) and NaHCO<sub>3</sub> (84 mg, 1.0 mmol) in 5 mL of DCM was added *m*-CPBA (172 mg, 1.0 mmol) at 0°C. After stirring at 25°C for 24 h, the reaction mixture was quenched with water, extracted with EtOAc, washed with brine, dried over anhydrous Na<sub>2</sub>SO<sub>4</sub>, and concentrated. Column chromatography on silica gel (EtOAc/petroleum ether = 1:15) gave 141 mg of **7a** (yield: 82%) as a colorless oil; <sup>1</sup>H NMR (600 MHz, CDCl<sub>3</sub>) δ 1.27 (t, *J* = 7.1 Hz, 3H), 1.34 (t, *J* = 7.1 Hz, 3H), 1.95–2.00 (m, 1H), 2.36–2.40 (m, 1H), 2.75–2.84 (m, 2H), 2.90–2.98 (m, 1H), 4.19–4.35 (m, 4H), 4.74 (s, 1H), 7.24–7.29 (m, 1H), 7.50–7.62 (m, 2H), 8.05–8.13 (m, 1H); <sup>13</sup>C NMR (151 MHz, CDCl<sub>3</sub>) δ 14.0, 14.0, 32.5, 36.2, 40.3, 60.9, 62.0, 62.1, 63.4, 64.9, 125.8, 127.9, 129.7, 134.0, 134.8, 135.7, 168.4, 168.8, 196.2; HRMS (ESI) calcd for C<sub>19</sub>H<sub>21</sub>O<sub>6</sub> (M + H)<sup>+</sup> 345.1338, found 345.1333.

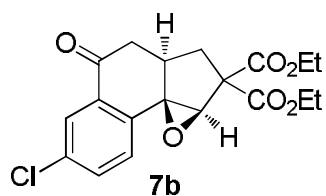

Compound **7b**. 76% yield (144 mg); white solid, mp 83–85°C; <sup>1</sup>H NMR (600 MHz, CDCl<sub>3</sub>) δ 1.27 (t, *J* = 7.1 Hz, 3H), 1.34 (t, *J* = 7.1 Hz, 3H), 1.94–2.00 (m, 1H), 2.35–2.41 (m, 1H), 2.73–2.82 (m, 2H), 2.90–3.00 (m, 1H), 4.19–4.37 (m, 4H), 4.71 (s, 1H), 7.21 (d, *J* = 8.2 Hz, 1H), 7.56 (dd, *J* = 2.2, 8.2 Hz, 1H), 8.07 (d, *J* = 2.2 Hz, 1H); <sup>13</sup>C NMR (151 MHz, CDCl<sub>3</sub>) δ 13.9, 14.0, 32.3, 36.0, 40.1, 60.8, 62.1, 62.1, 63.5, 64.3, 127.5, 127.9, 134.0, 134.0, 136.1, 136.3, 168.2, 168.7, 194.8; HRMS (ESI) calcd for C<sub>19</sub>H<sub>20</sub>ClO<sub>6</sub> (M + H)<sup>+</sup> 379.0948, found 379.0952.

Crystal data for **7b** (C<sub>19</sub>H<sub>19</sub>ClO<sub>6</sub>, 378.79): triclinic, space group *P*-1, *a* = 9.9793(12) Å, *b* = 11.9540(15) Å, *c* = 15.515(2) Å, *U* = 1814.8(4) Å<sup>3</sup>, *Z* = 4, *T* = 296(2) K, absorption coefficient 0.243 mm<sup>-1</sup>, reflections collected 8218, independent reflections 4660 [*R*(int) = 0.0639], refinement by full-matrix least-squares on *F*<sup>2</sup>, data/restraints/parameters 8218/26/470, goodness-of-fit on *F*<sup>2</sup> =



1.017, final R indices [ $I > 2\sigma(I)$ ]  $R_1 = 0.0720$ ,  $wR_2 = 0.1765$ , R indices (all data)  $R_1 = 0.1273$ ,  $wR_2 = 0.2177$ , largest diff. peak and hole 0.870 and  $-0.352 \text{ e} \cdot \text{\AA}^{-3}$ . Crystallographic data for the structure **7b** have been deposited with the Cambridge Crystallographic Data Centre as supplementary publication No. CCDC1439851.

### Experimental Procedure for the Synthesis of $\alpha$ -BromoDiketone **7c**:<sup>3</sup>

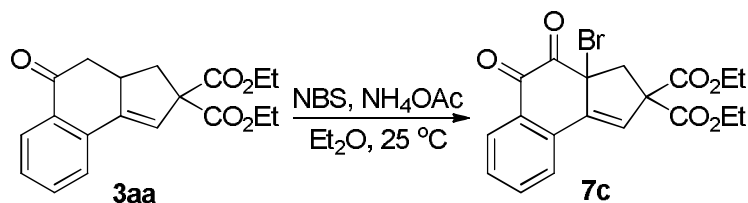

To a solution of **3aa** (82 mg, 0.25 mmol) in 1 mL of  $\text{Et}_2\text{O}$  was added NBS (445 mg, 2.5 mmol) and  $\text{NH}_4\text{OAc}$  (19 mg, 0.25 mmol). After stirring at room temperature for 1.5 h, the reaction mixture was quenched with water, extracted with  $\text{EtOAc}$ , washed with brine, dried over anhydrous  $\text{Na}_2\text{SO}_4$ , and concentrated. Column chromatography on silica gel ( $\text{EtOAc}$ /petroleum ether = 1:15) gave 80 mg of **7c** (yield: 76%) as a colorless oil;  $^1\text{H NMR}$  (600 MHz,  $\text{CDCl}_3$ )  $\delta$  1.24–1.28 (m, 3H), 1.34–1.38 (m, 3H), 3.30 (d,  $J = 18.2 \text{ Hz}$ , 1H), 3.72 (d,  $J = 18.2 \text{ Hz}$ , 1H), 4.11–4.38 (m, 4H), 5.95 (s, 1H), 7.56 (t,  $J = 6.2 \text{ Hz}$ , 2H), 7.73 (t,  $J = 7.1 \text{ Hz}$ , 1H), 8.11–8.15 (m, 1H);  $^{13}\text{C NMR}$  (151 MHz,  $\text{CDCl}_3$ )  $\delta$  13.8, 14.0, 34.7, 51.8, 62.6, 62.9, 64.7, 126.6, 130.1, 130.8, 131.0, 131.4, 135.6, 135.7, 153.8, 166.2, 168.7, 178.2, 179.1; HRMS (ESI) calcd for  $\text{C}_{19}\text{H}_{18}\text{BrO}_6$  ( $\text{M} + \text{H}$ )<sup>+</sup> 421.0287, found 421.0274.

### Experimental Procedure for the Preparation of 1-Naphthol **7d** via Reduction of **3ak**:

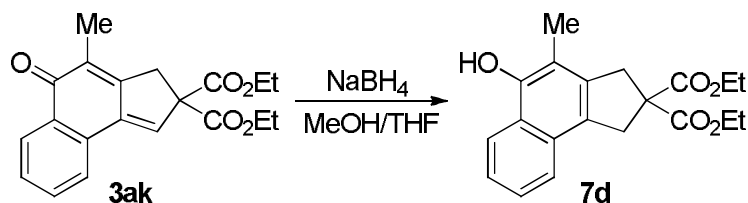

To a solution of **3ak** (170 mg, 0.5 mmol) in 2 mL of  $\text{MeOH/THF}$  ( $v/v = 1:1$ ) was added  $\text{NaBH}_4$  (23 mg, 0.6 mmol). After stirring at  $25^\circ\text{C}$  for 30 min, the reaction mixture was quenched with water, extracted with  $\text{EtOAc}$ , washed with brine, dried over anhydrous  $\text{Na}_2\text{SO}_4$ , and concentrated.

<sup>3</sup>K. Tanemura, T. Suzuki, Y. Nishida, K. Satsumabayashi and T. Horaguchi, *Chem. Commun.*, 2004, 470.

Column chromatography on silica gel (EtOAc/petroleum ether = 1:10) gave 154 mg of **7d** (yield: 92%) as a colorless oil;  $^1\text{H}$  NMR (600 MHz,  $\text{CDCl}_3$ )  $\delta$  1.28 (t,  $J = 7.1$  Hz, 6H), 2.28 (s, 3H), 3.69 (s, 2H), 3.89 (s, 2H), 4.24 (q,  $J = 7.1$  Hz, 4H), 5.23 (br,s, 1H), 7.40–7.46 (m, 2H), 7.66 (d,  $J = 7.6$  Hz, 1H), 8.07 (d,  $J = 7.8$  Hz, 1H);  $^{13}\text{C}$  NMR (151 MHz,  $\text{CDCl}_3$ )  $\delta$  12.3, 14.0, 39.2, 40.8, 59.6, 61.8, 113.5, 121.7, 123.9, 124.0, 124.5, 125.7, 126.8, 128.8, 137.5, 148.2, 172.0; HRMS (ESI) calcd for  $\text{C}_{20}\text{H}_{23}\text{O}_5$  ( $\text{M} + \text{H}$ ) $^+$  343.1545, found 343.1535.

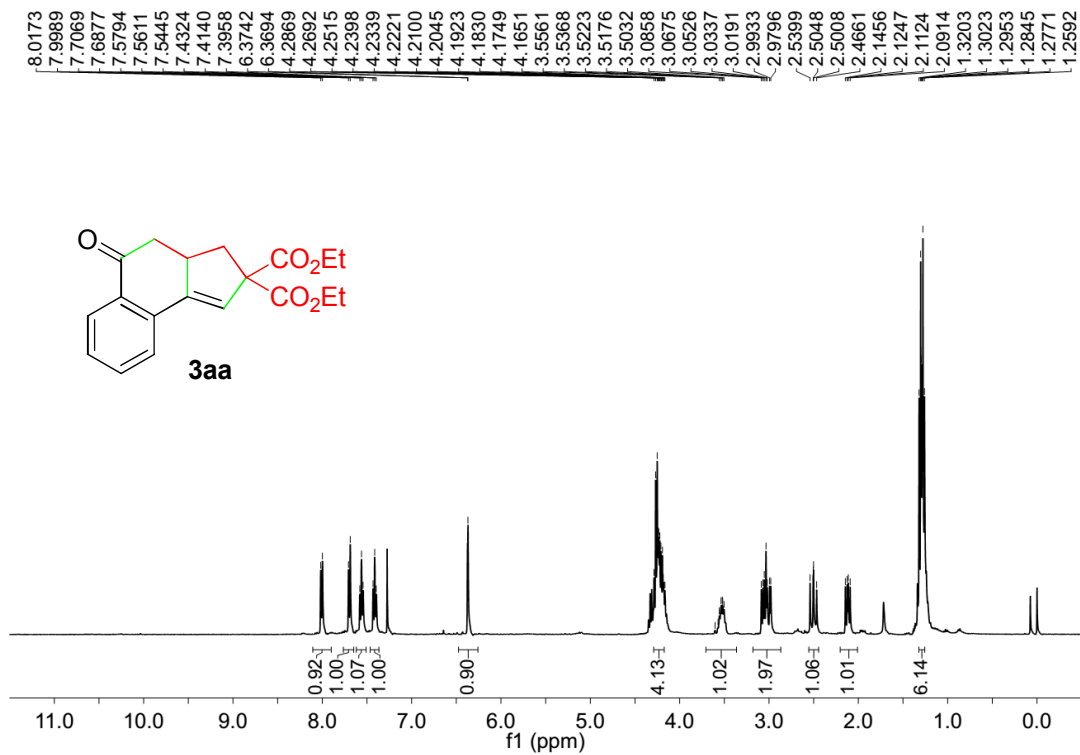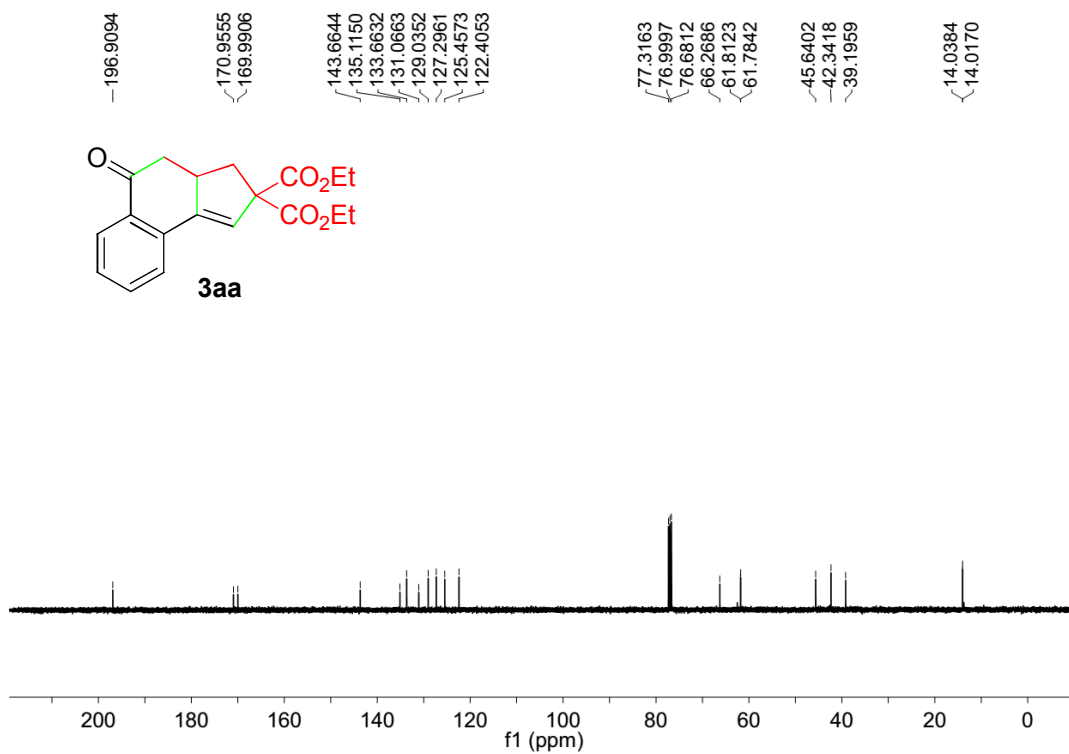

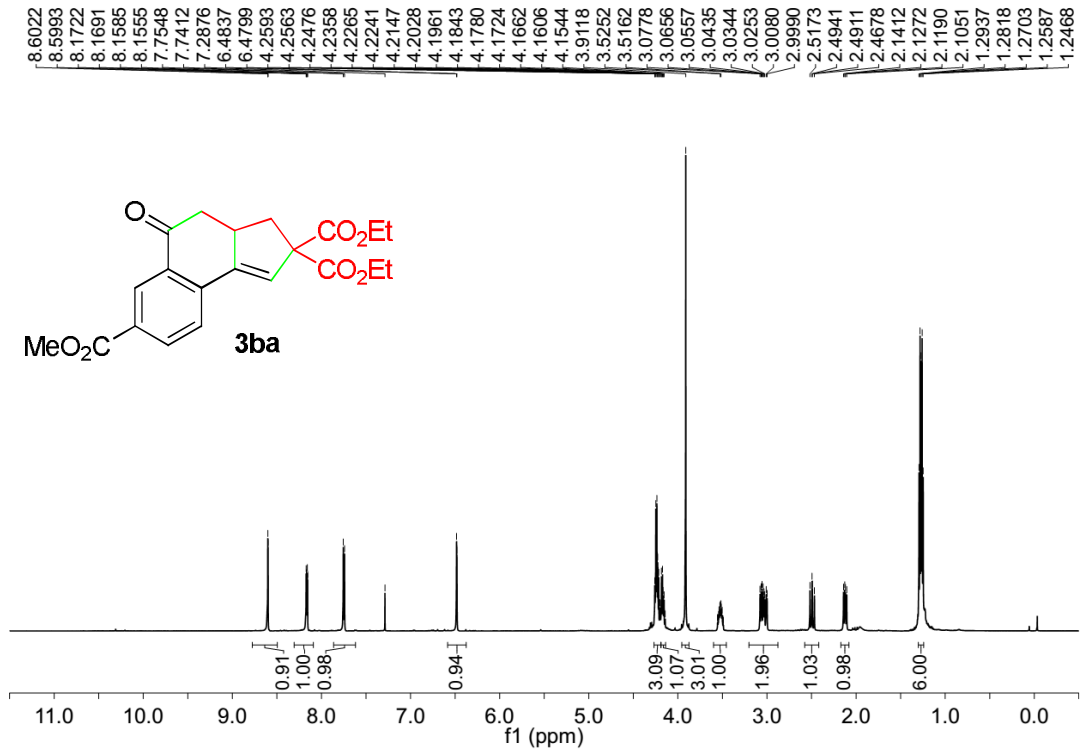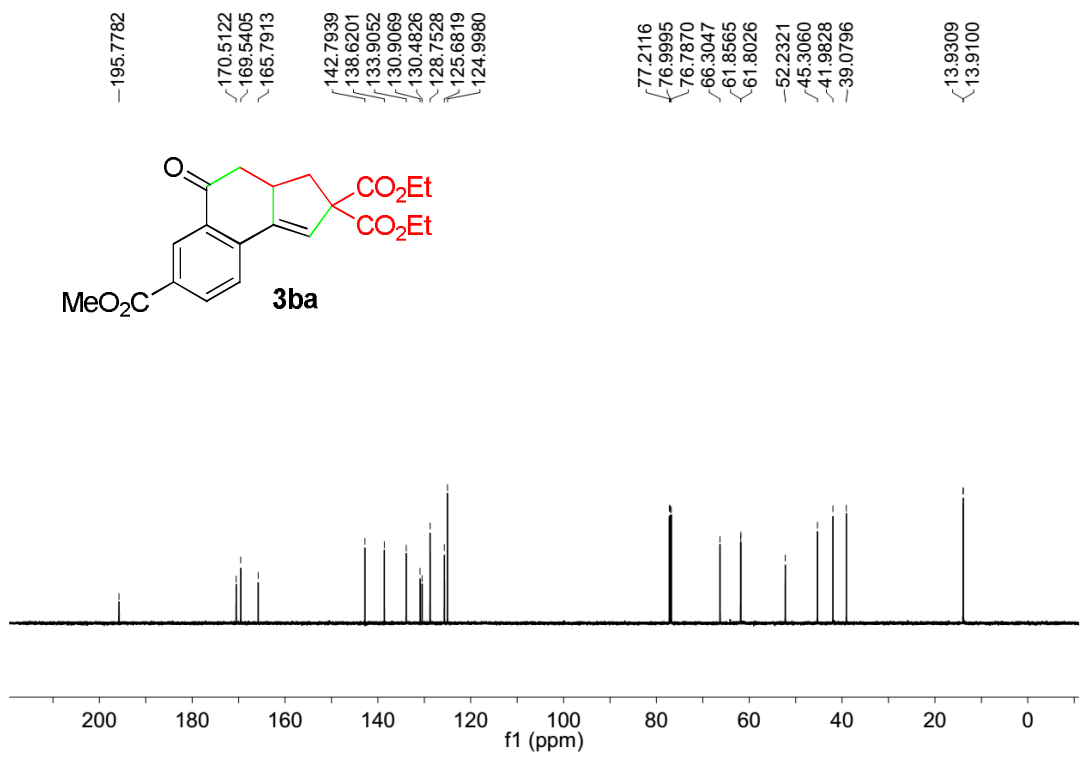

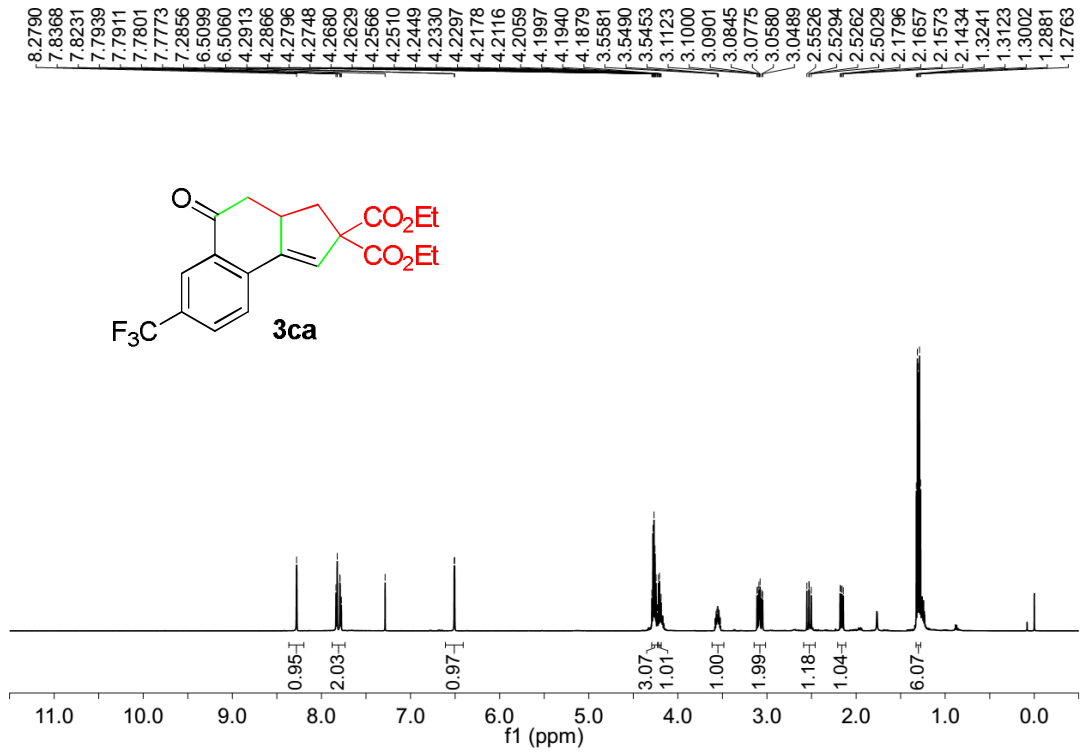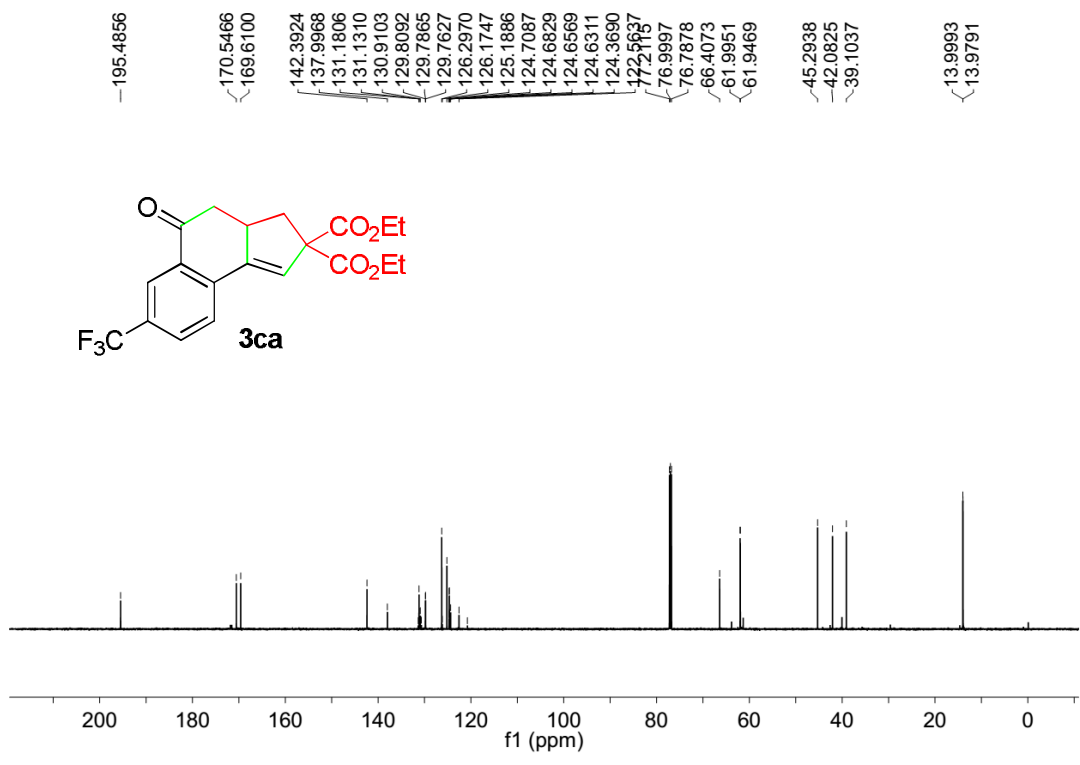

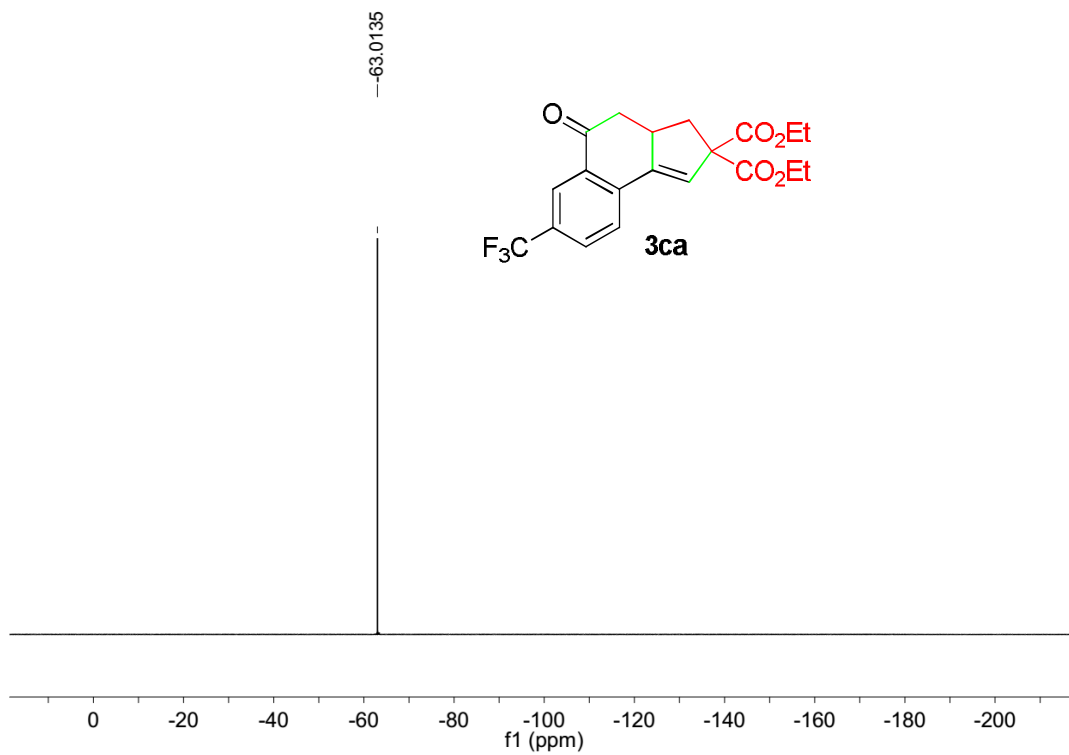

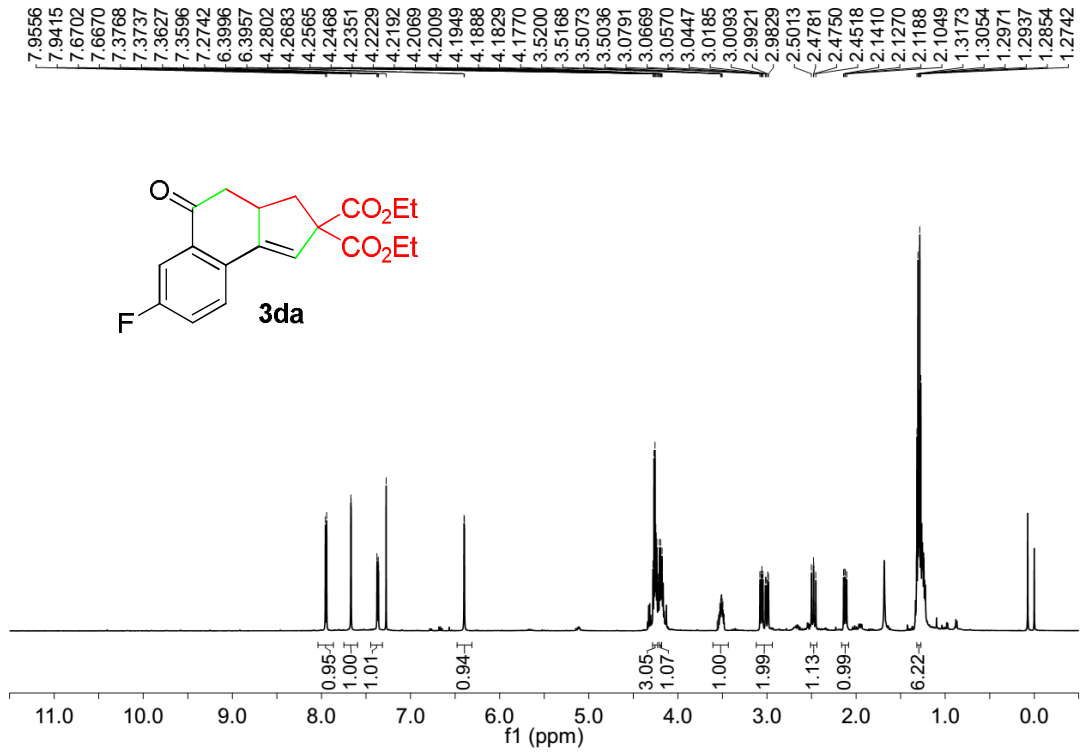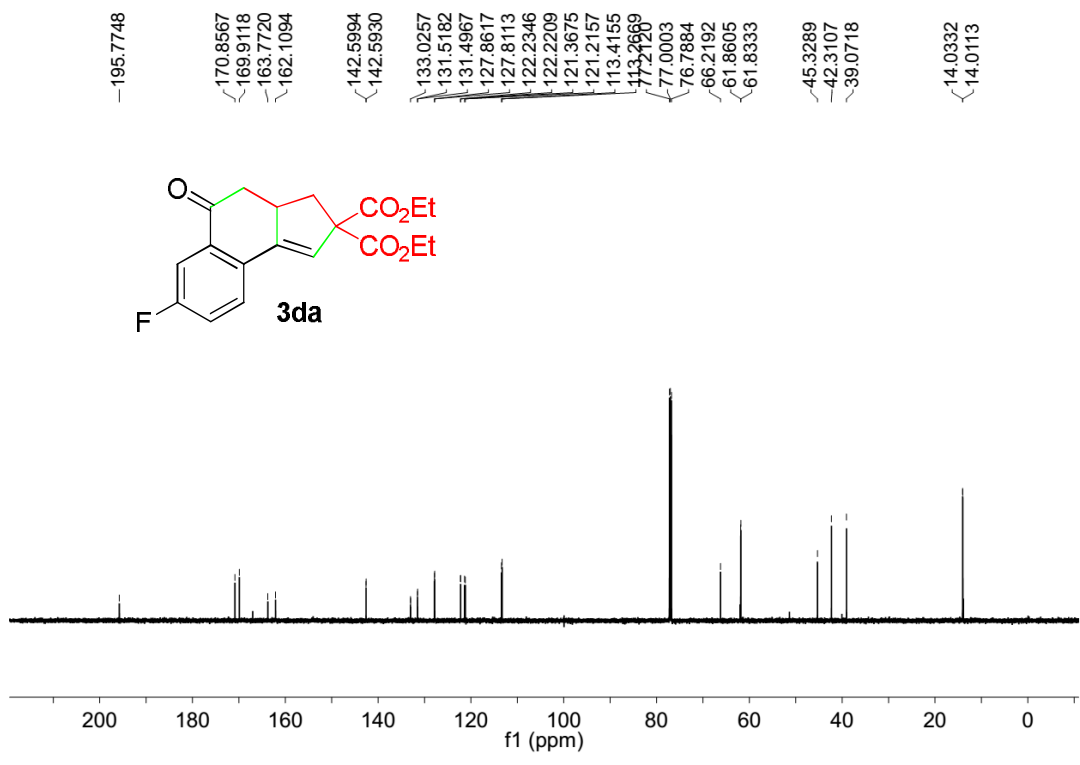

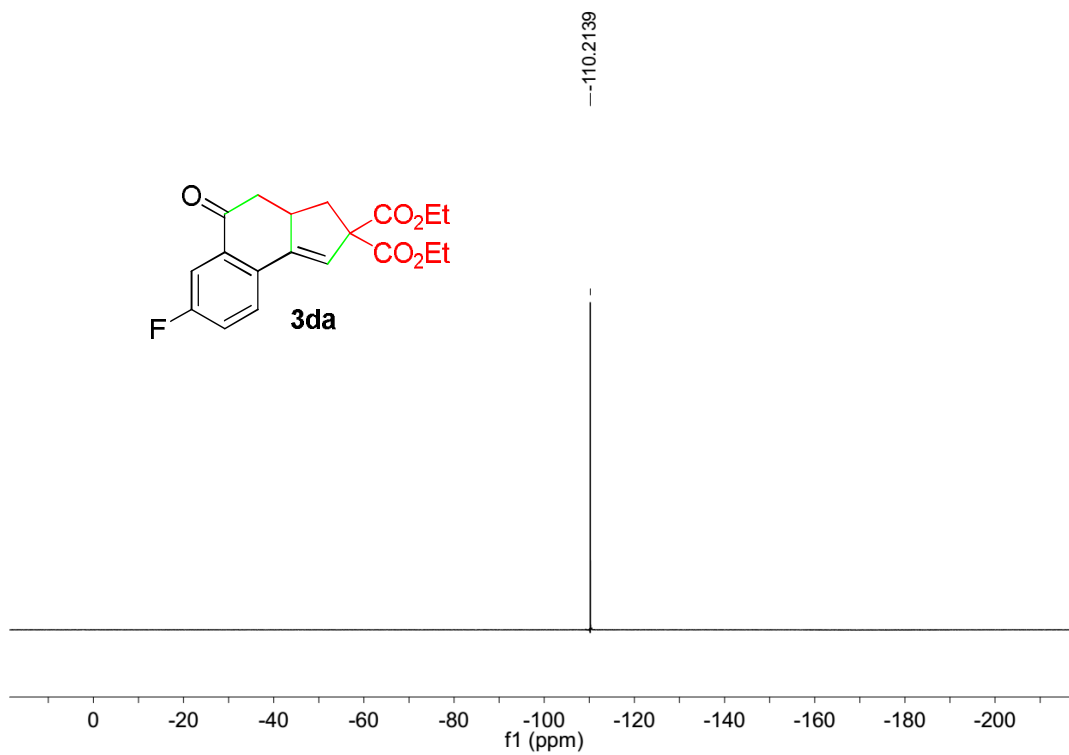



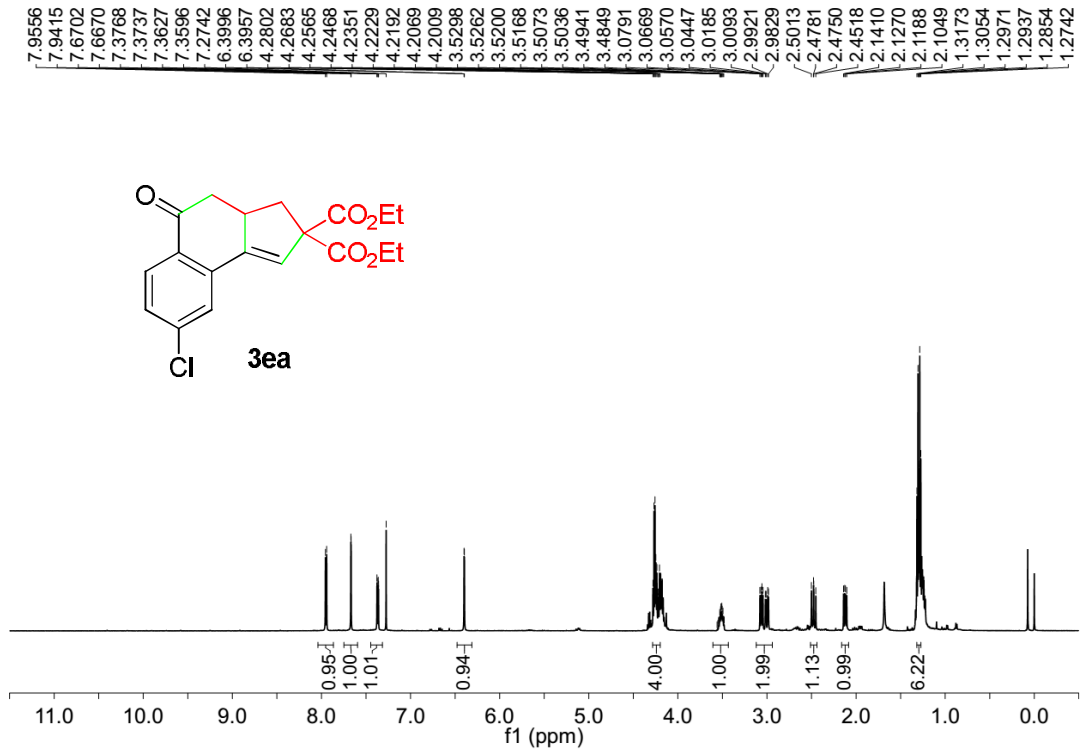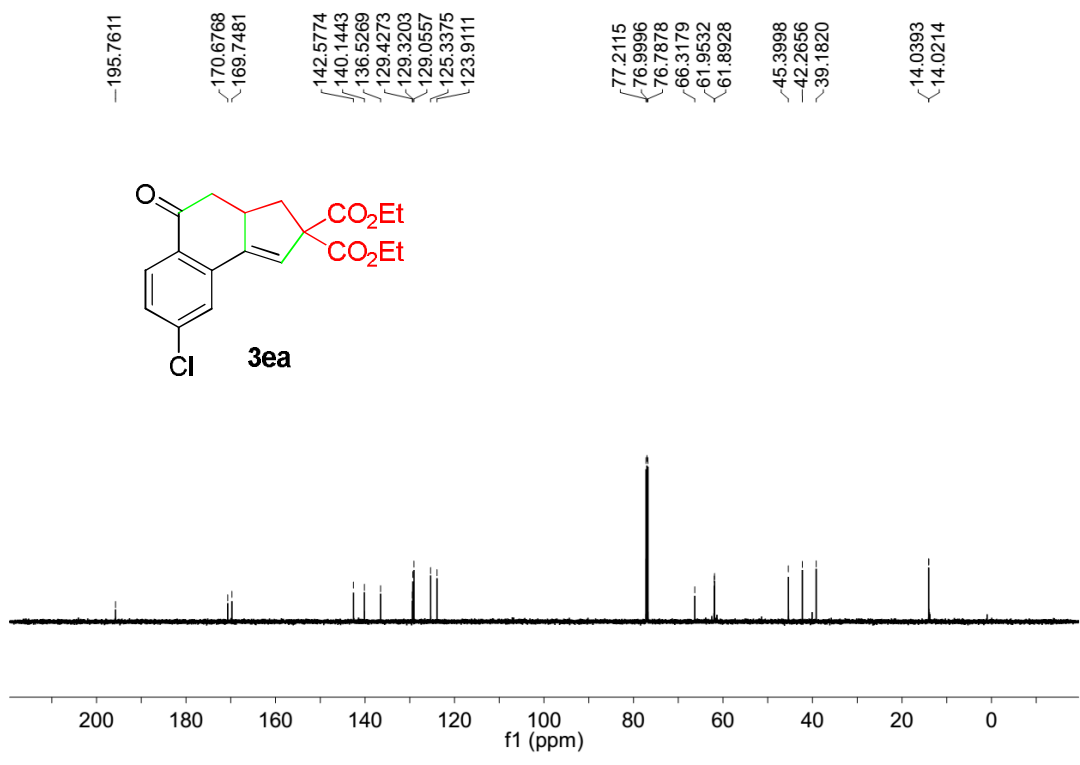

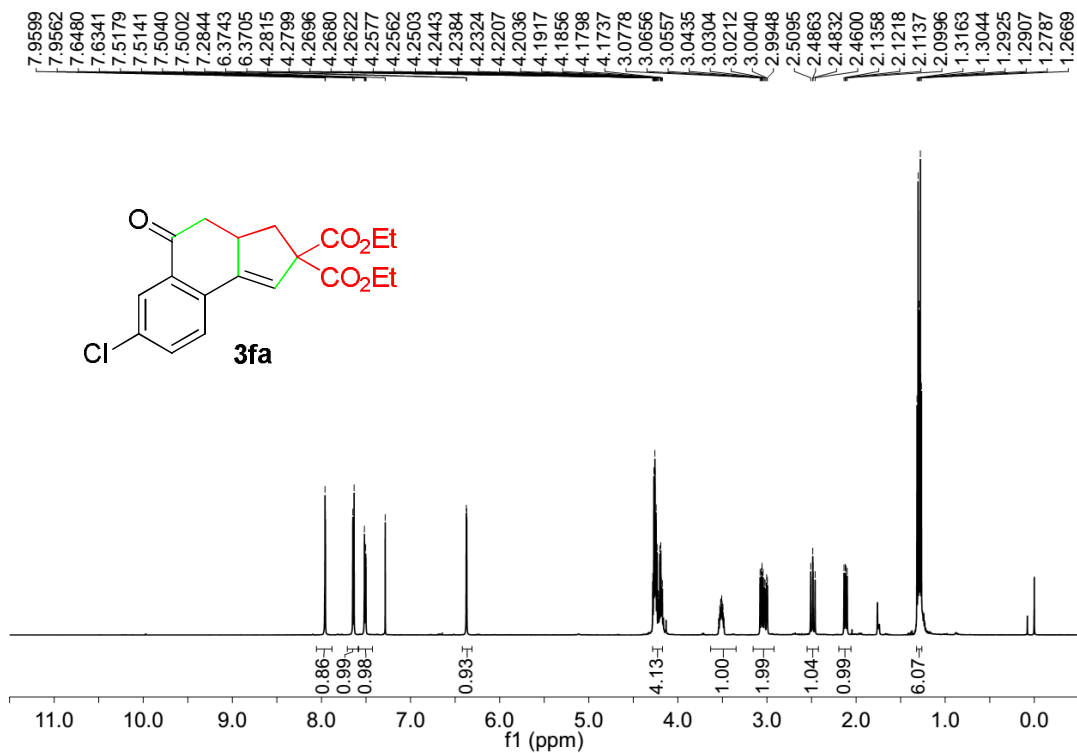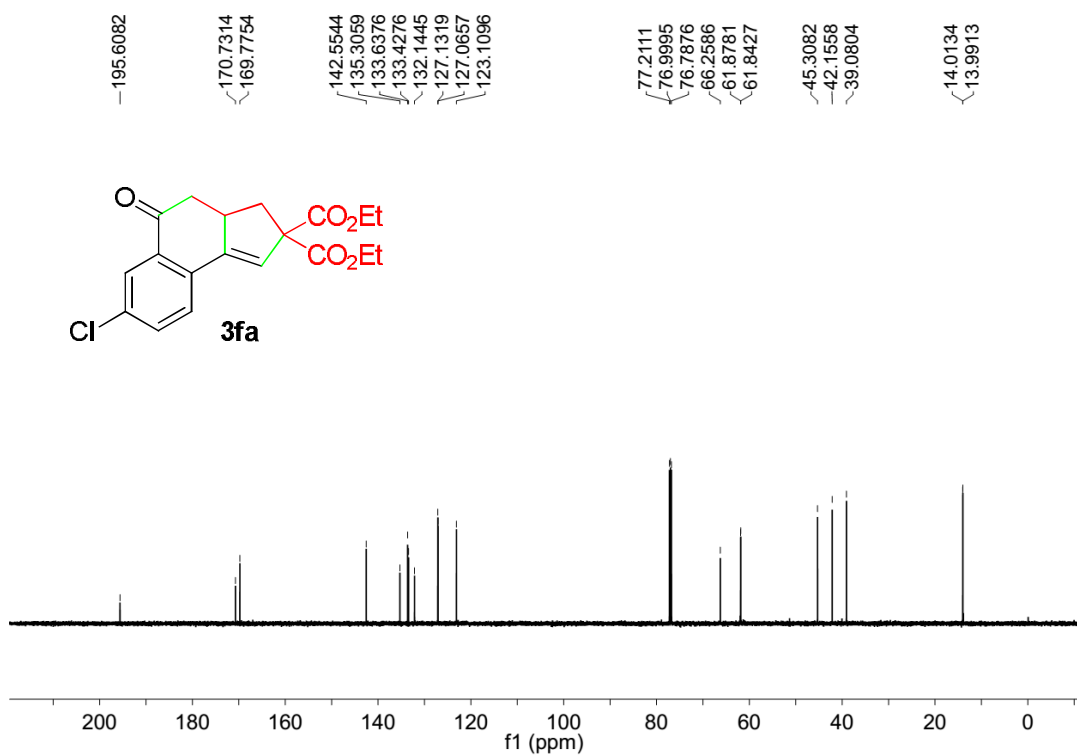

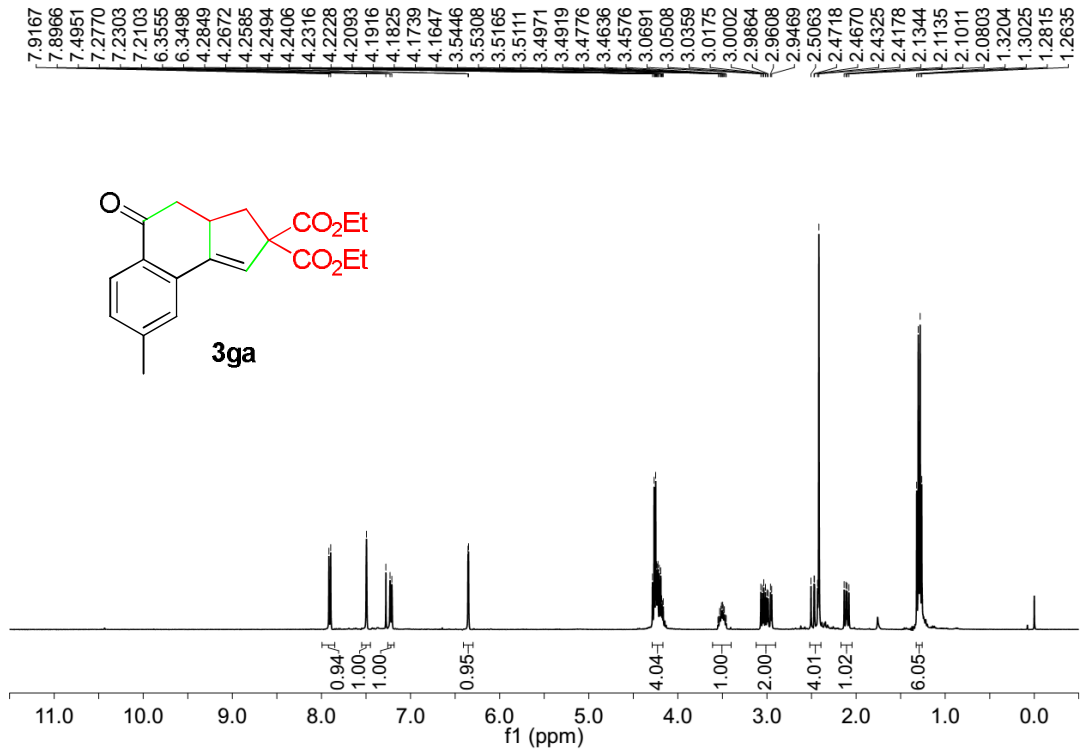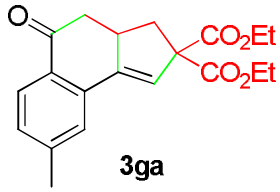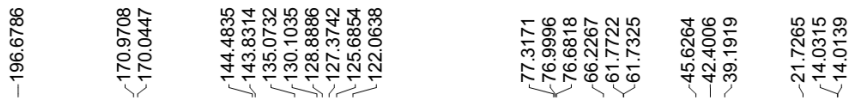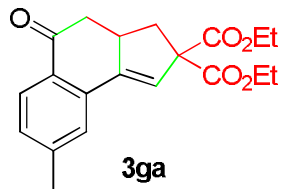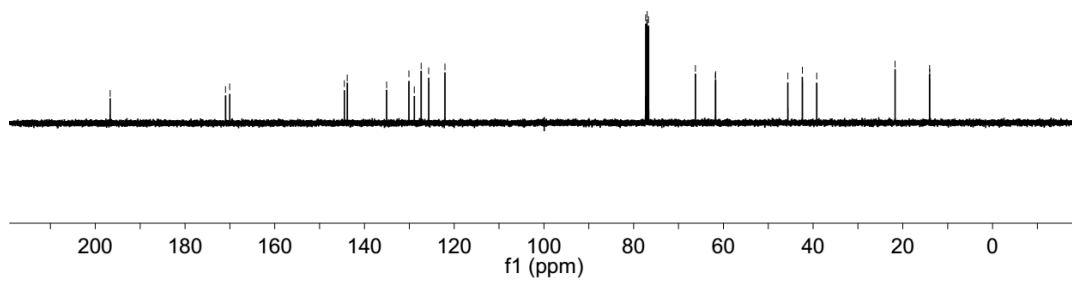

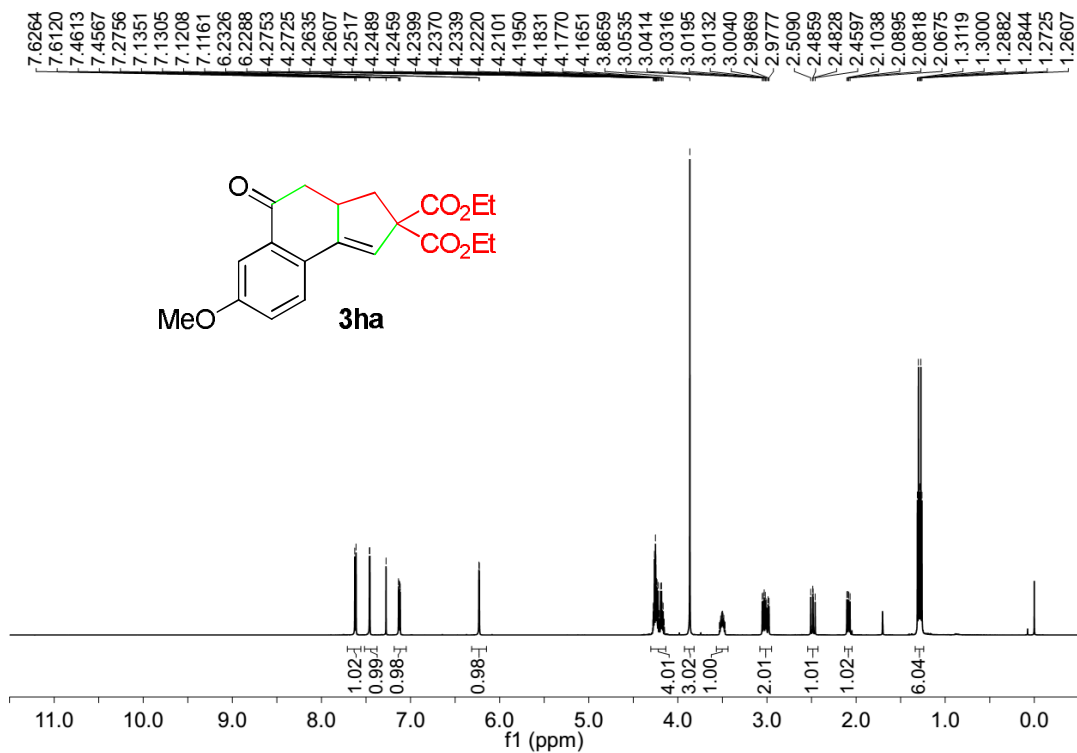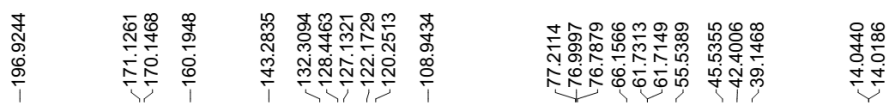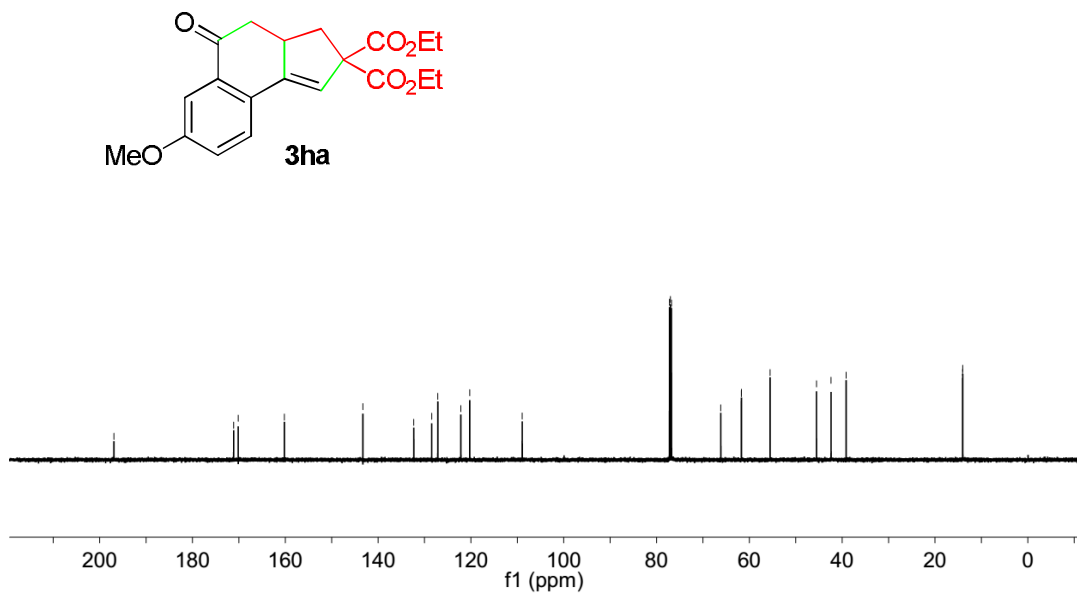

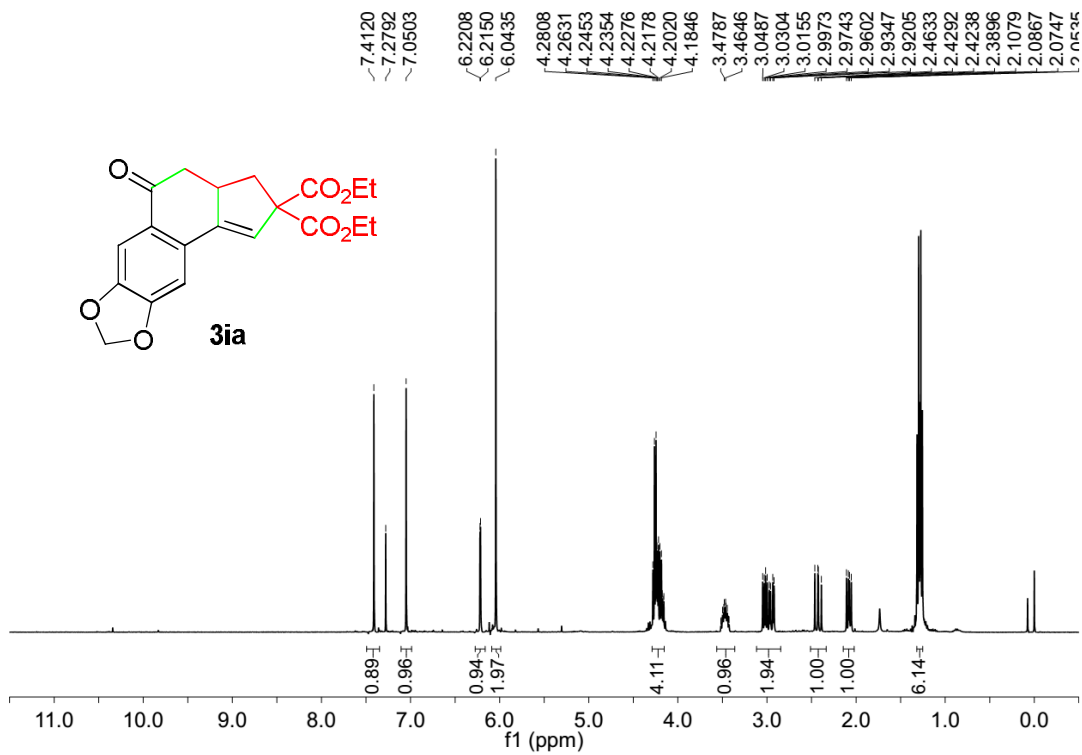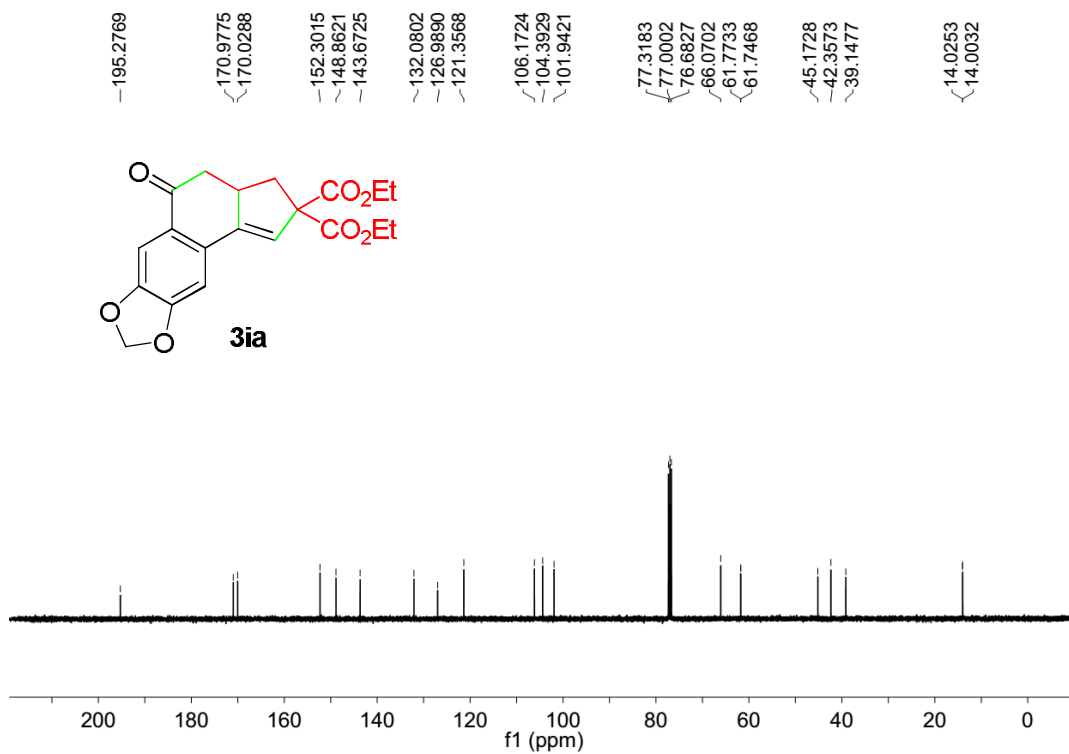

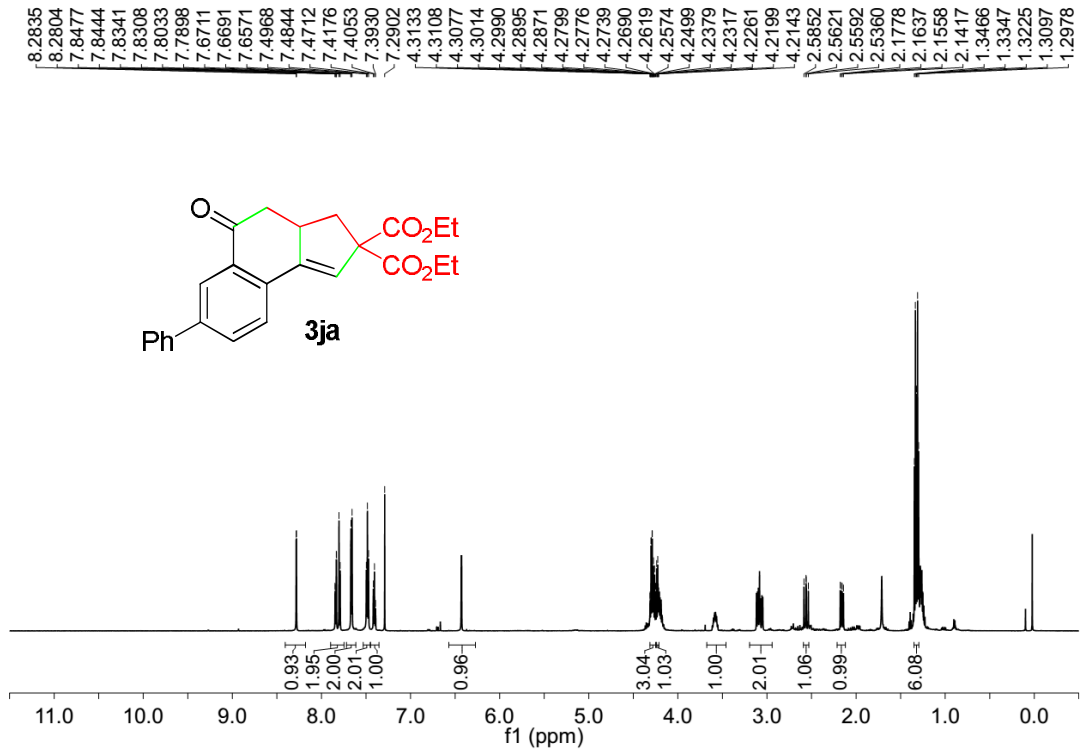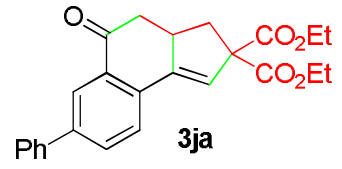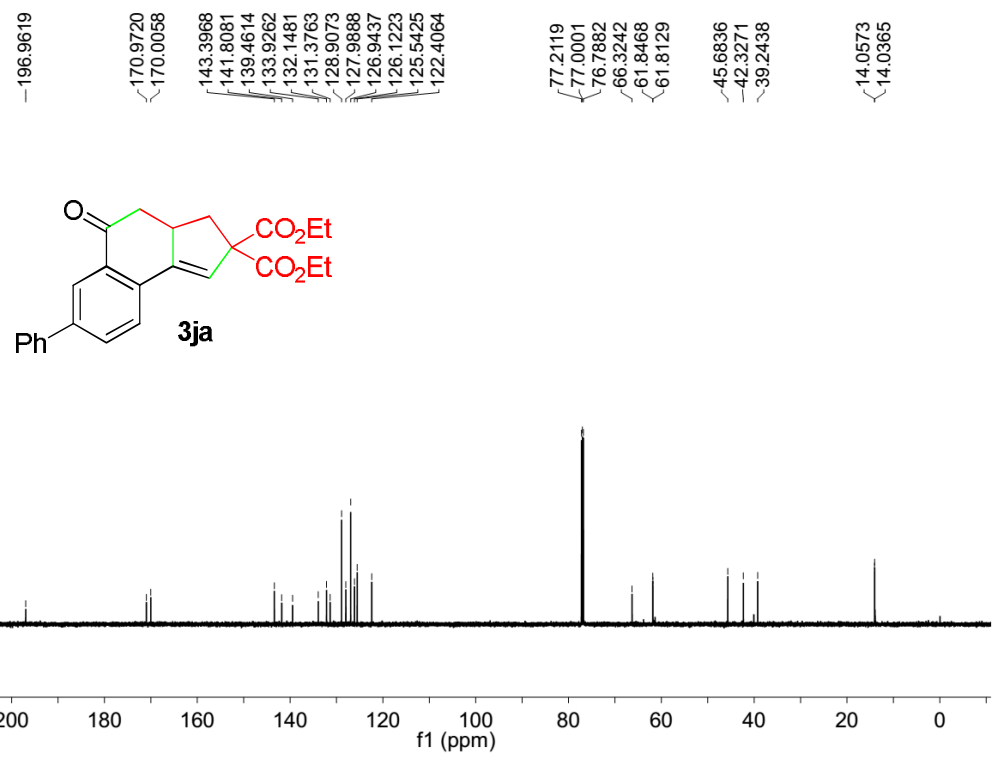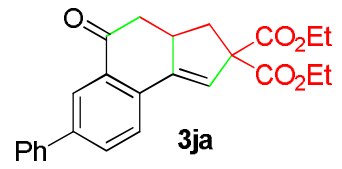

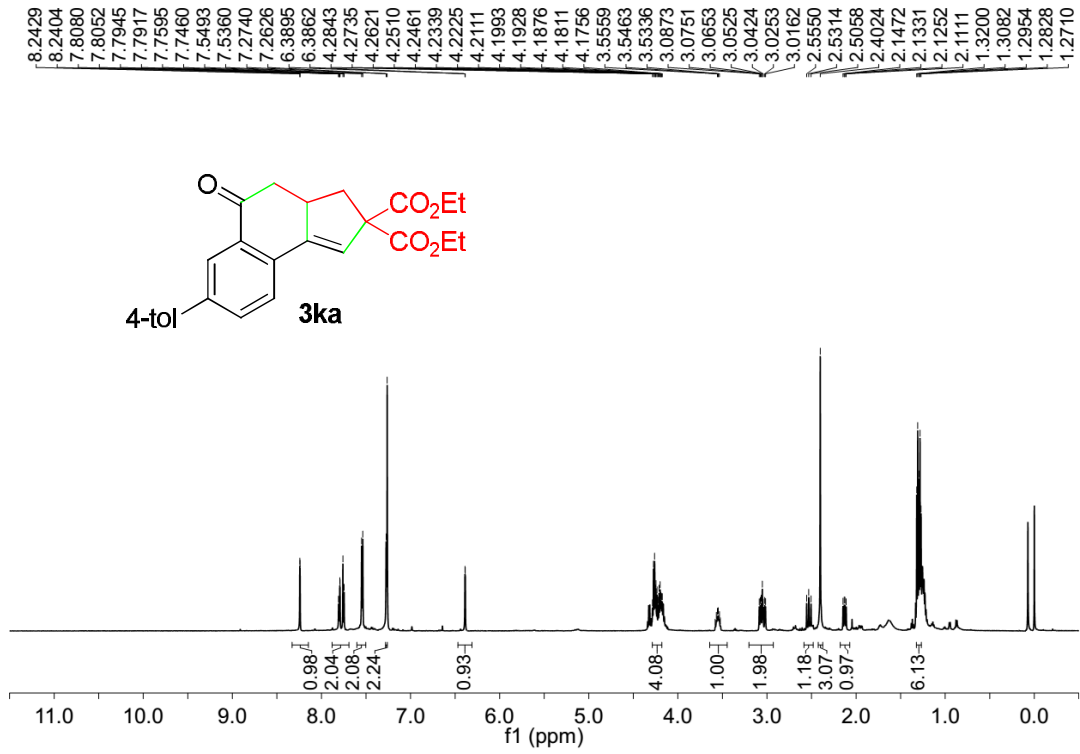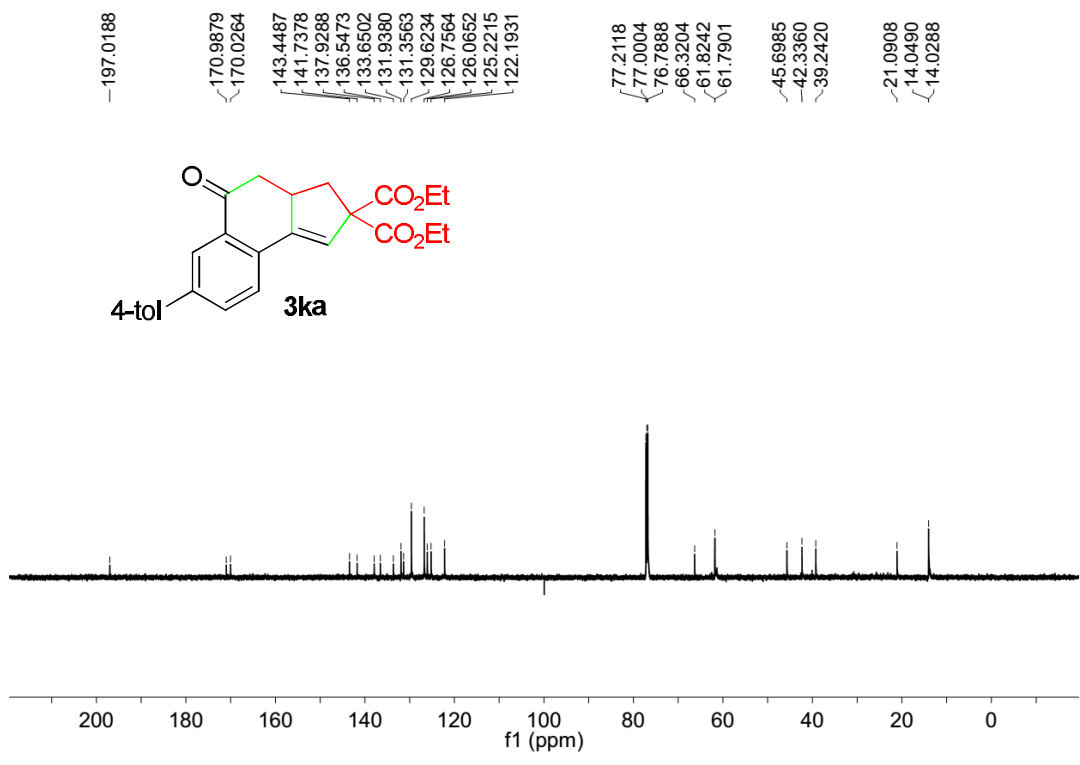

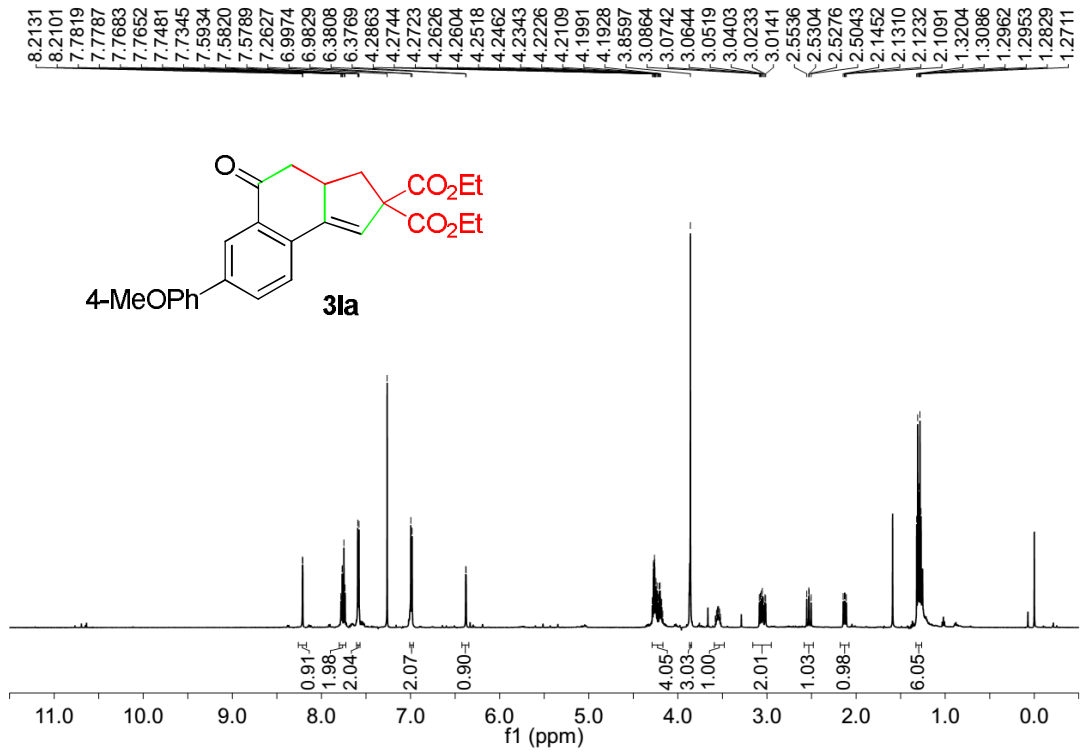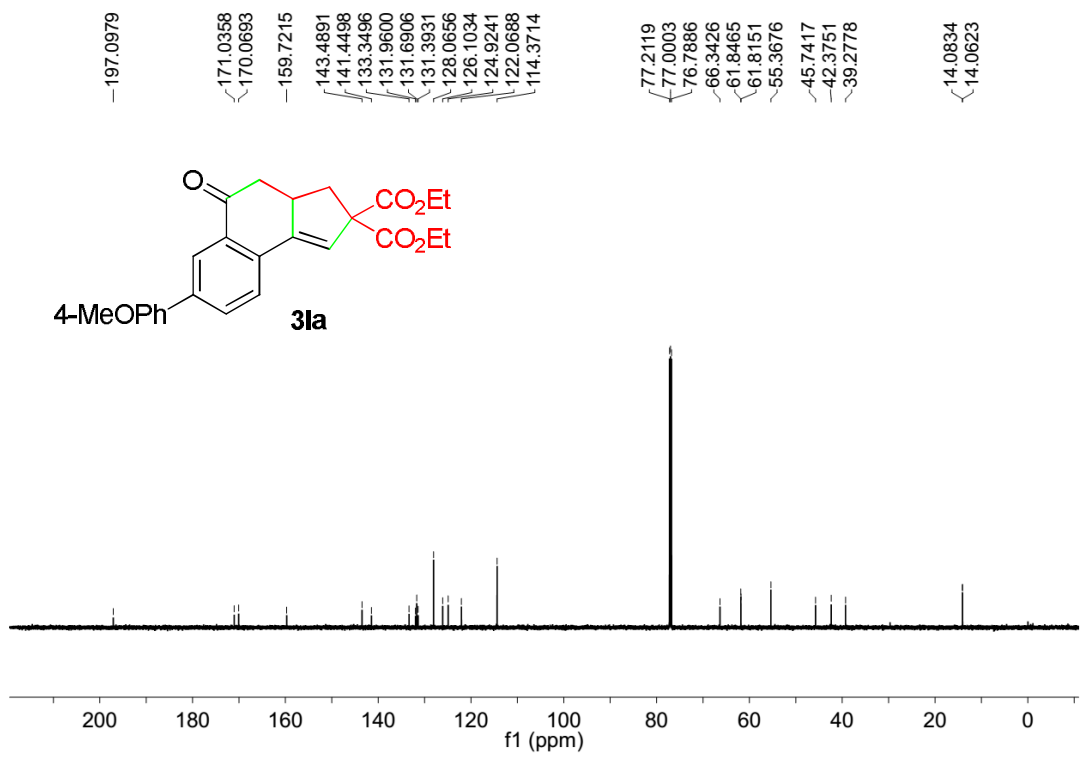



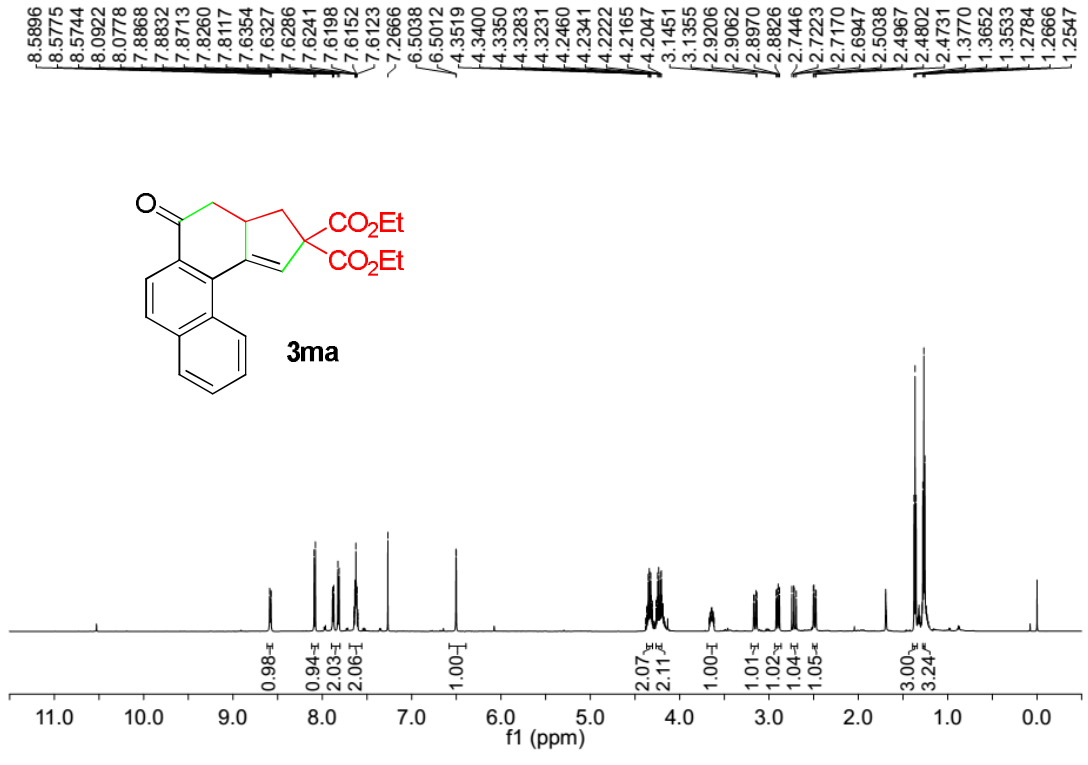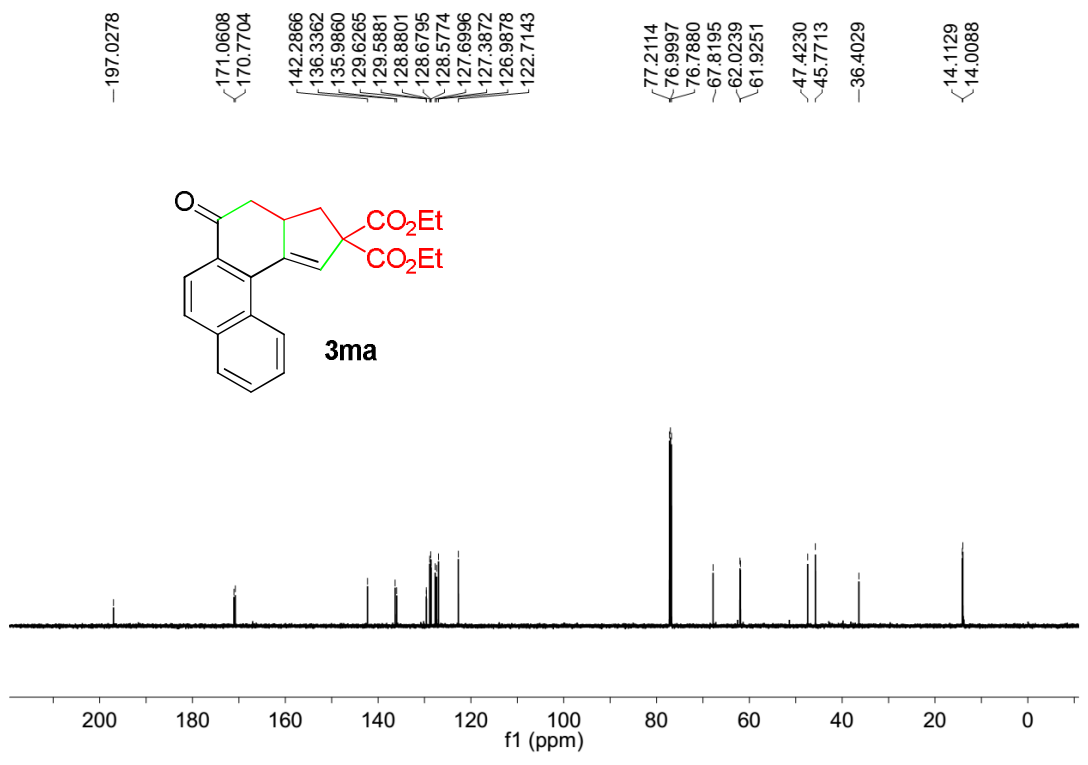

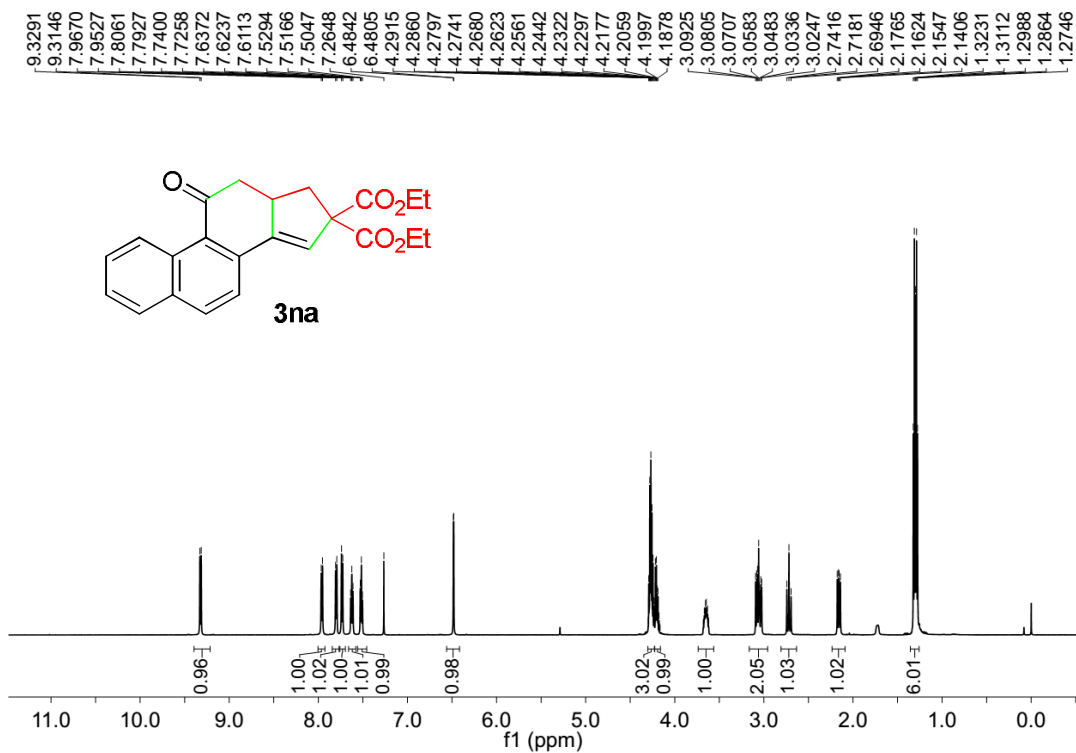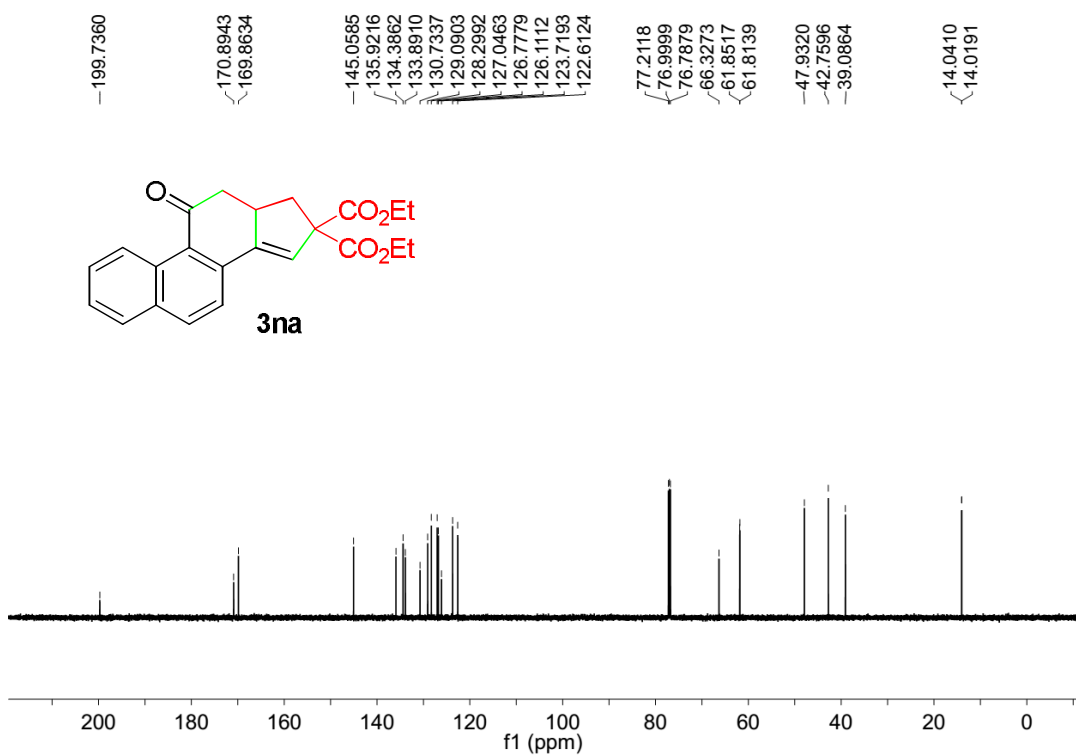

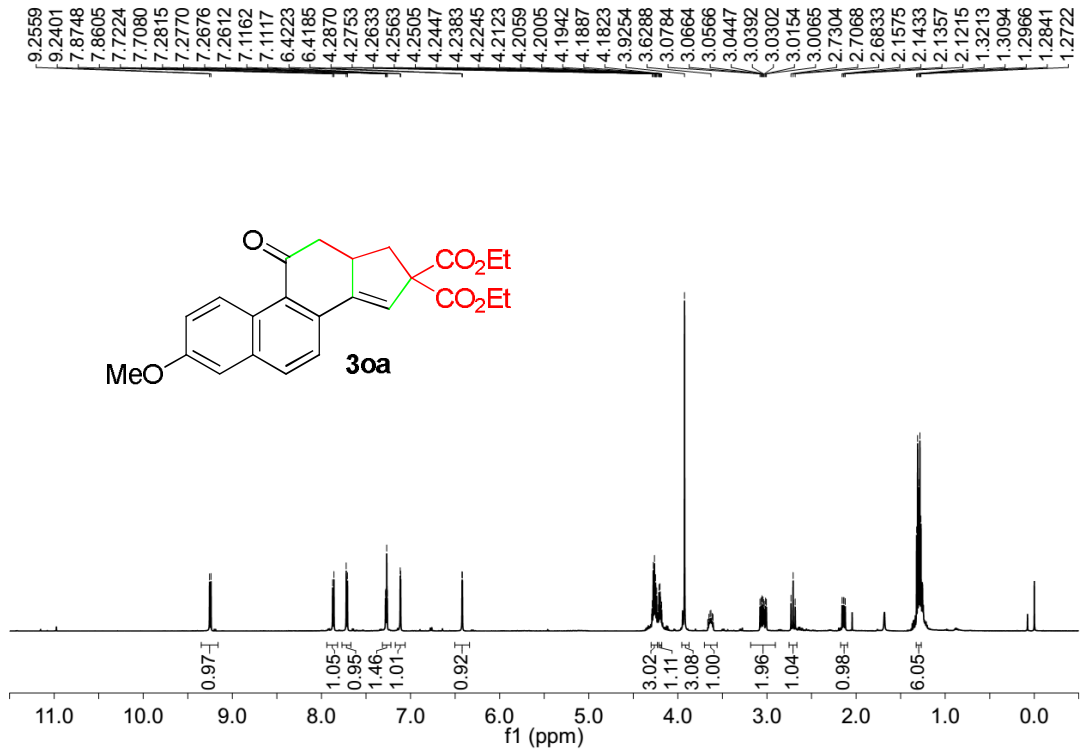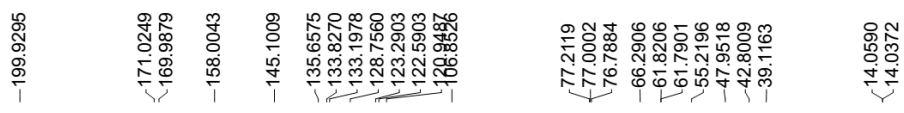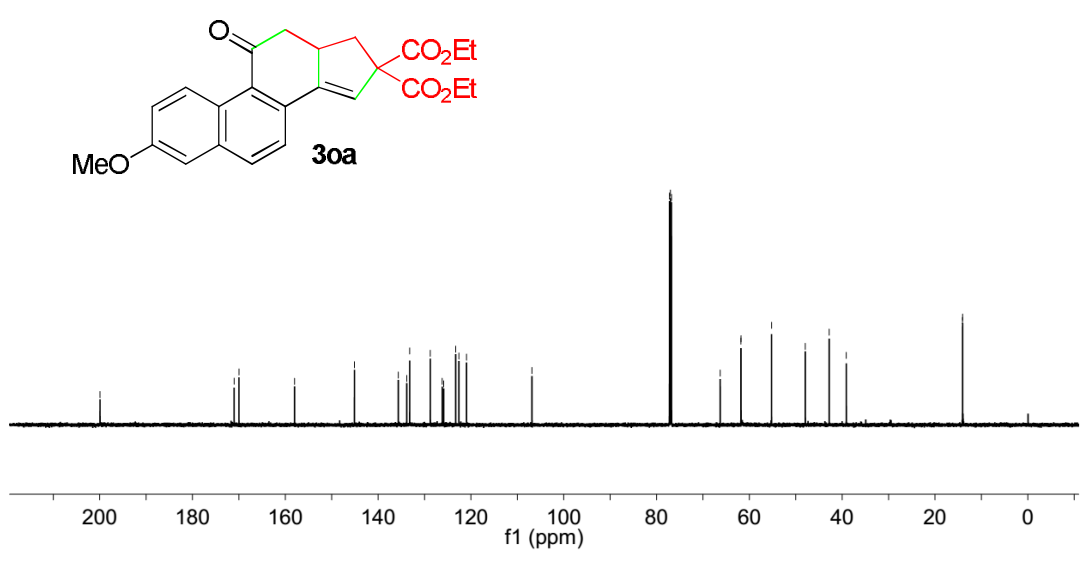

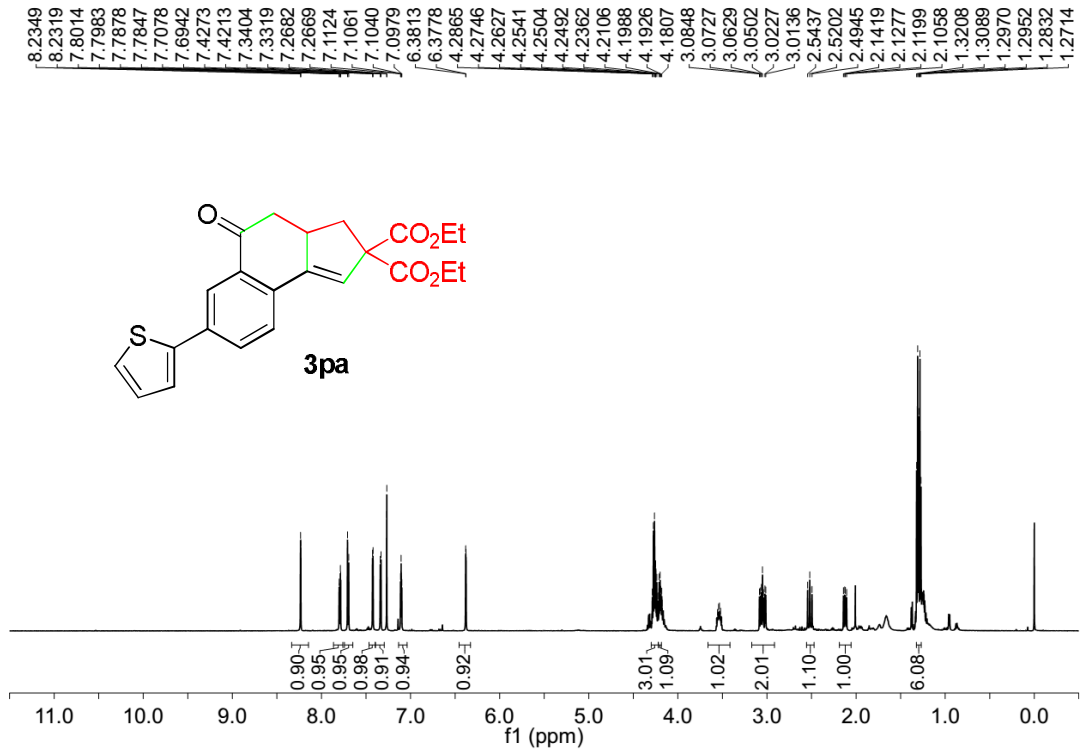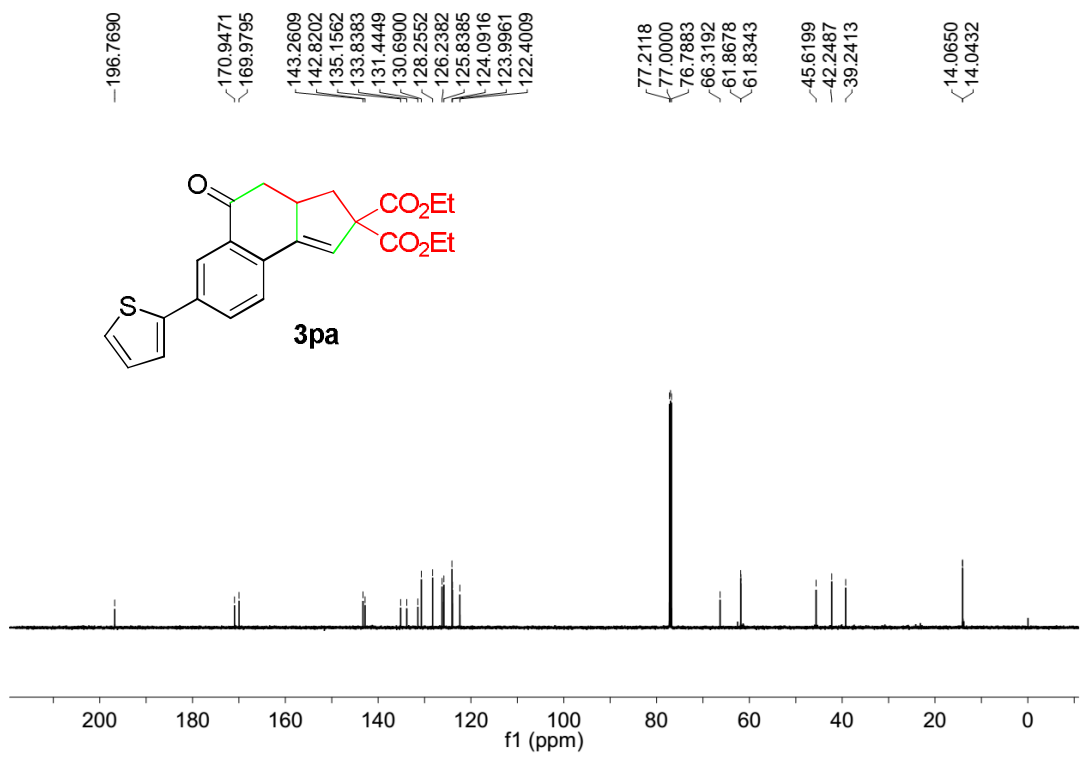

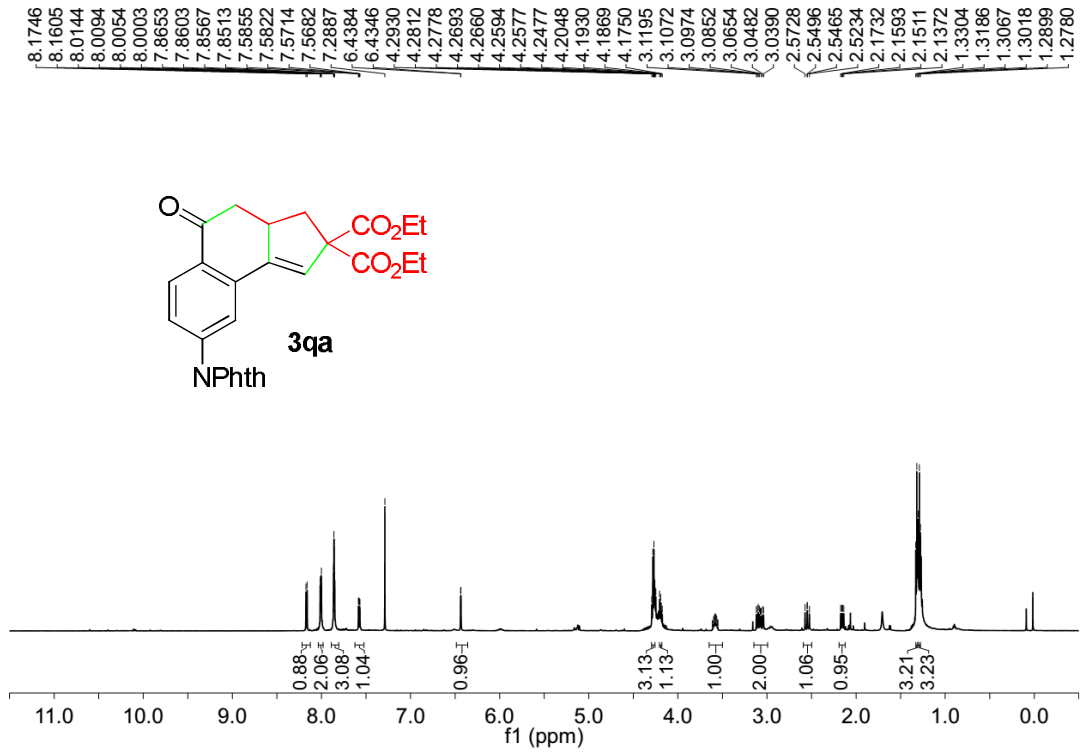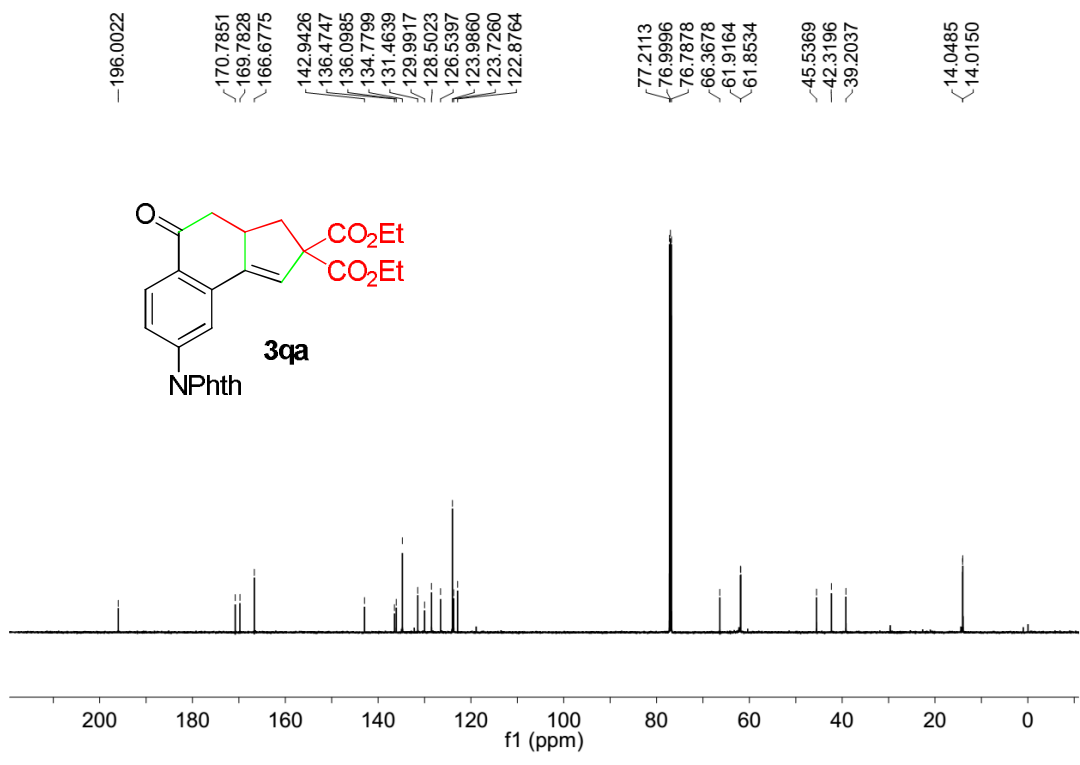

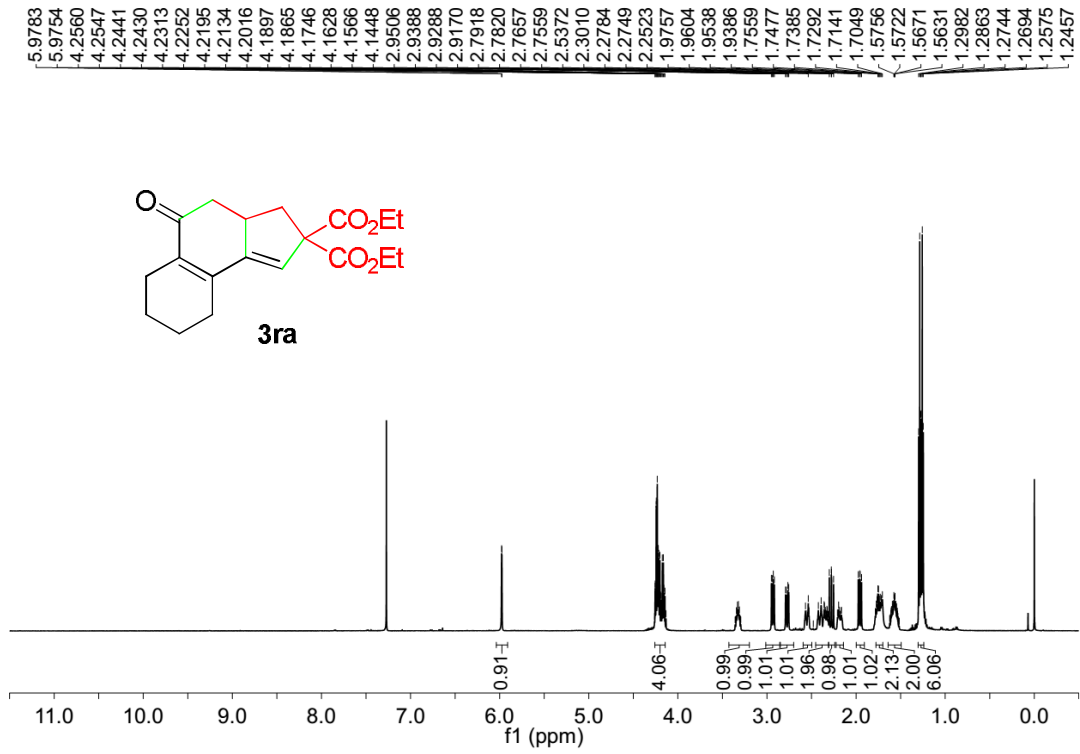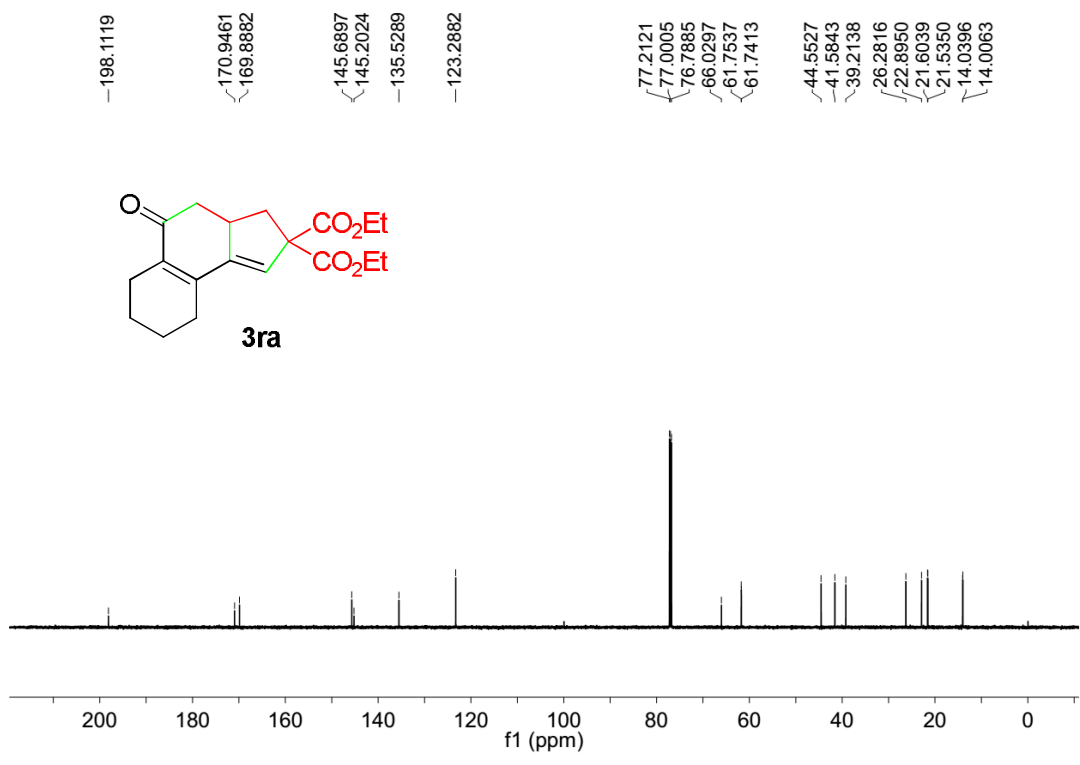

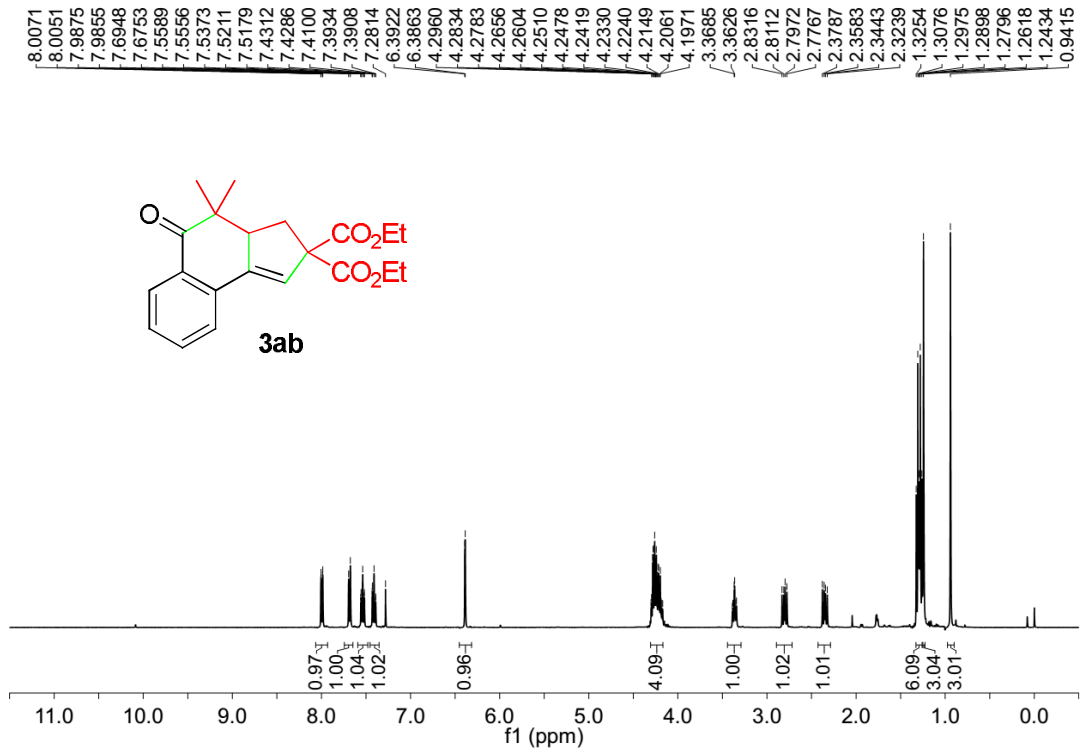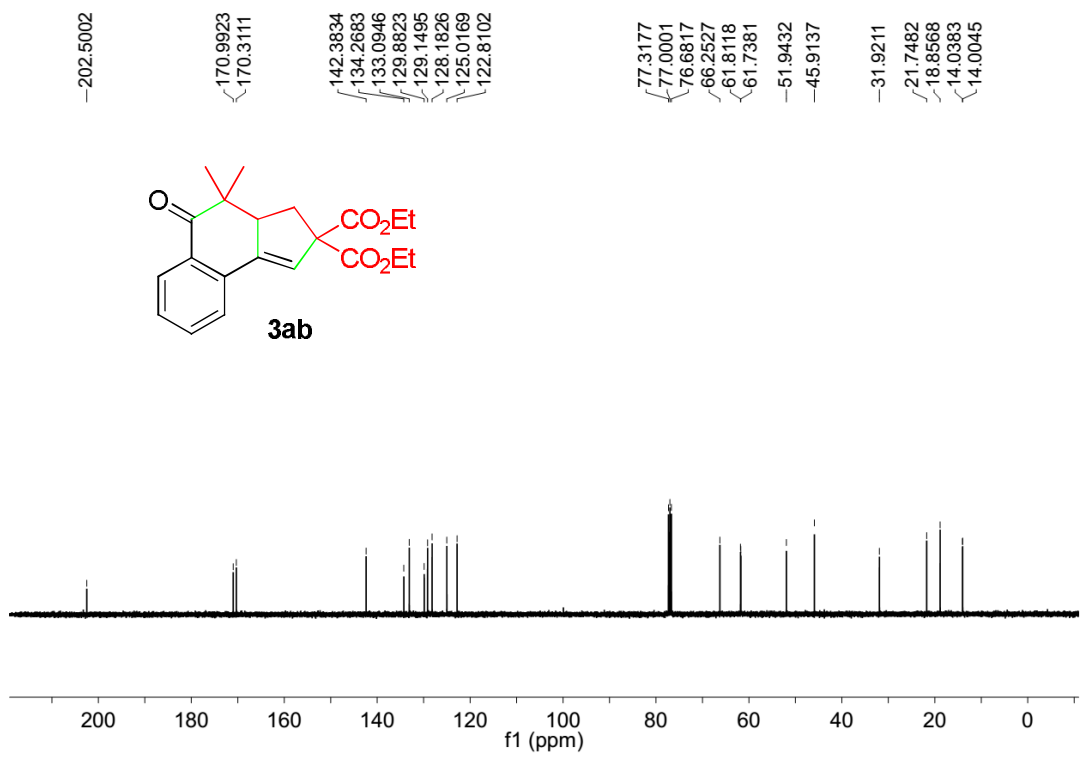

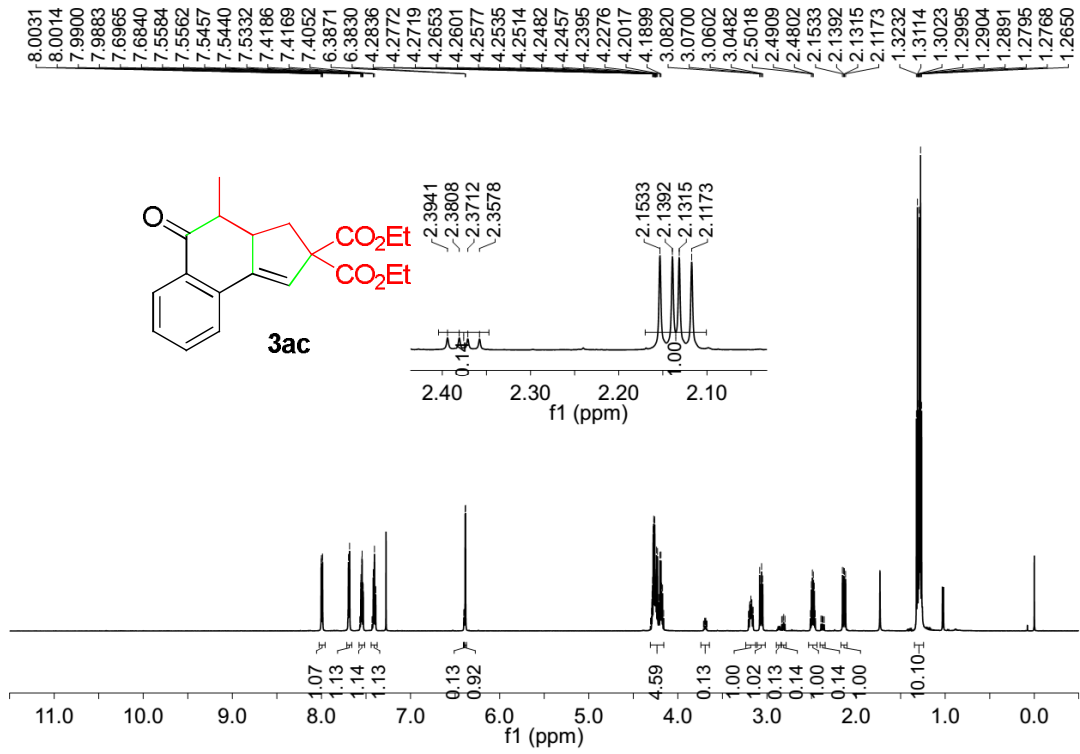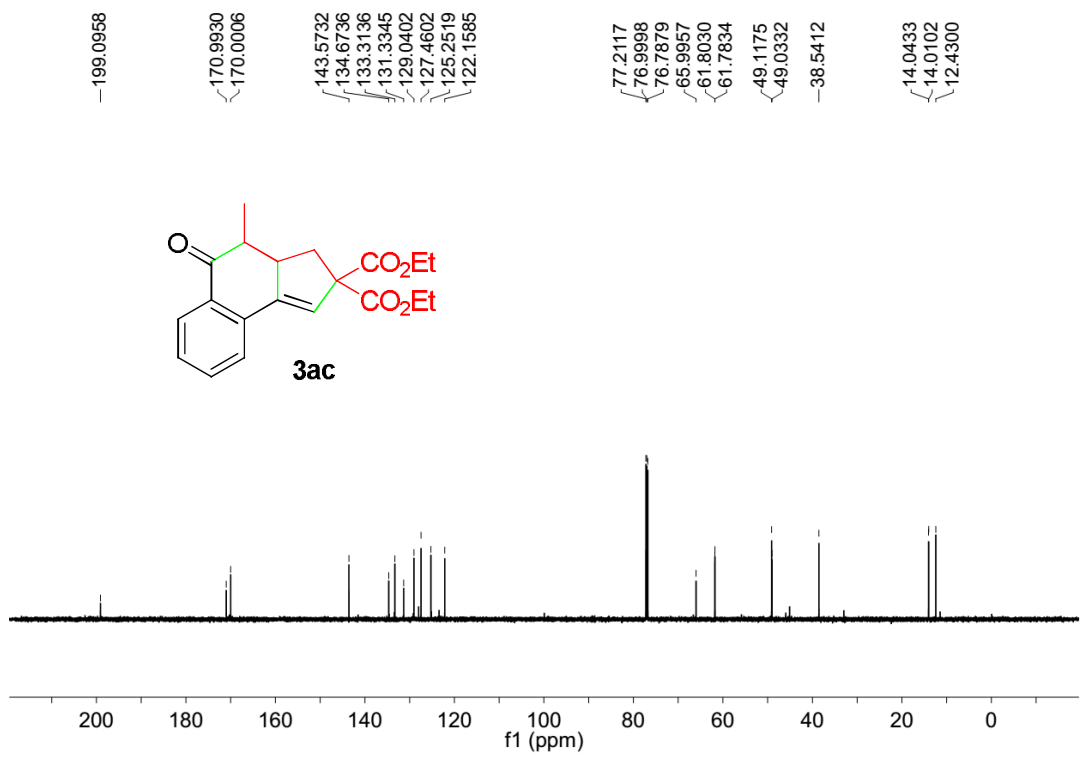



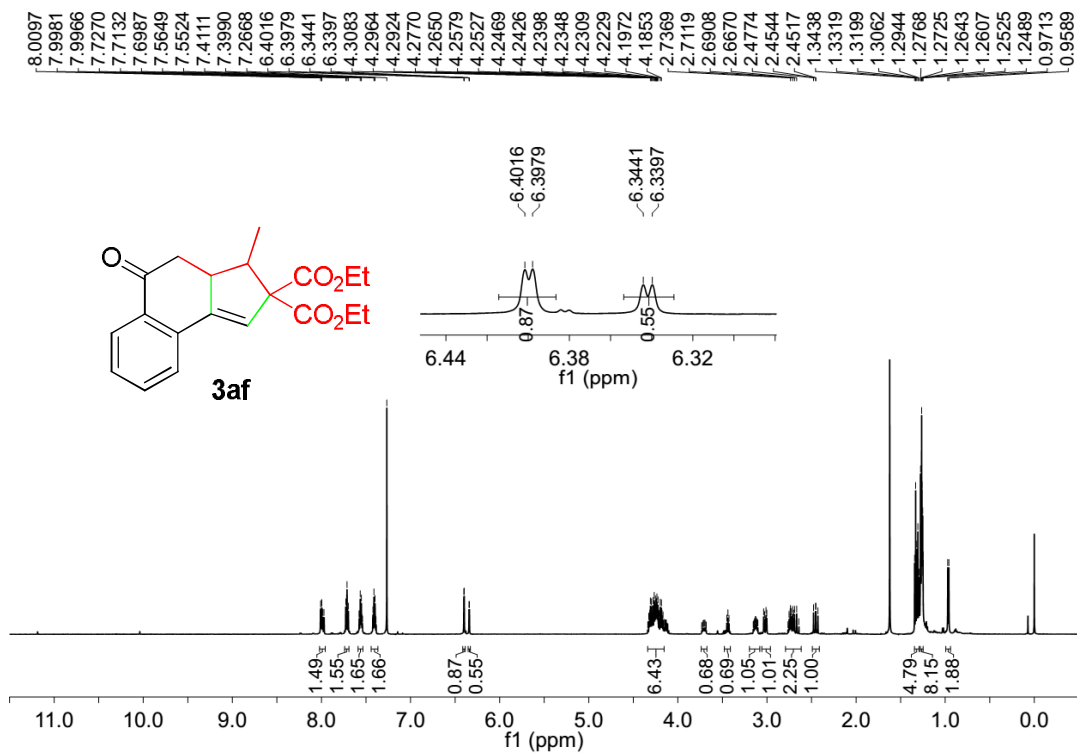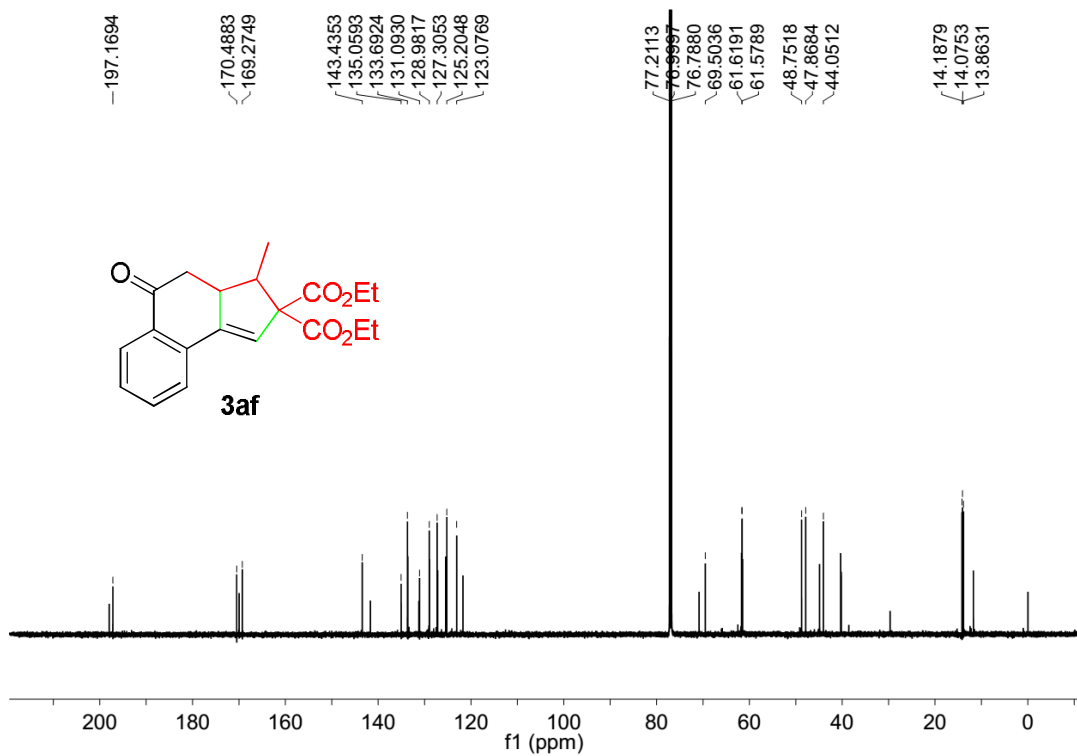

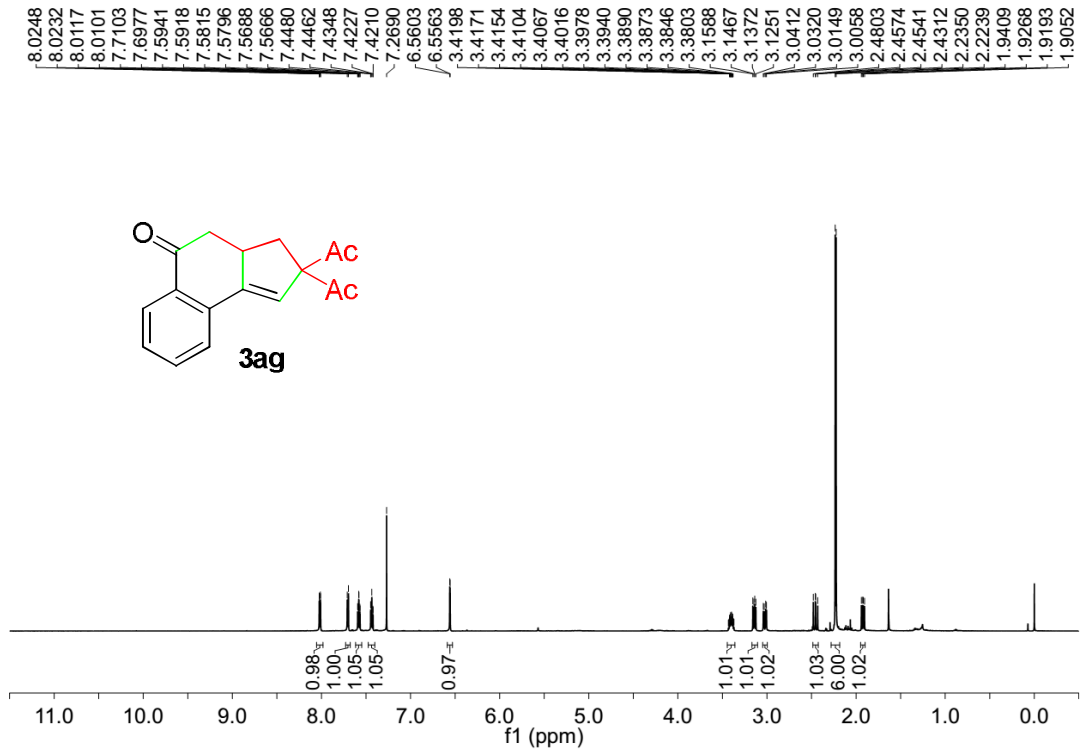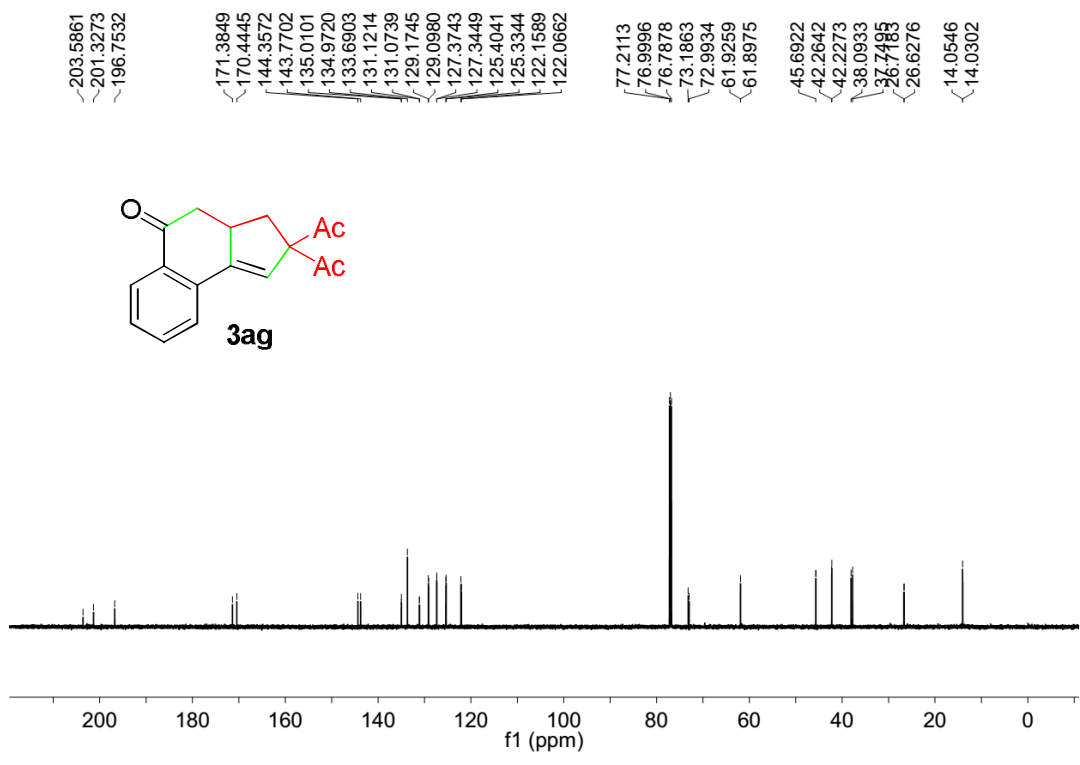

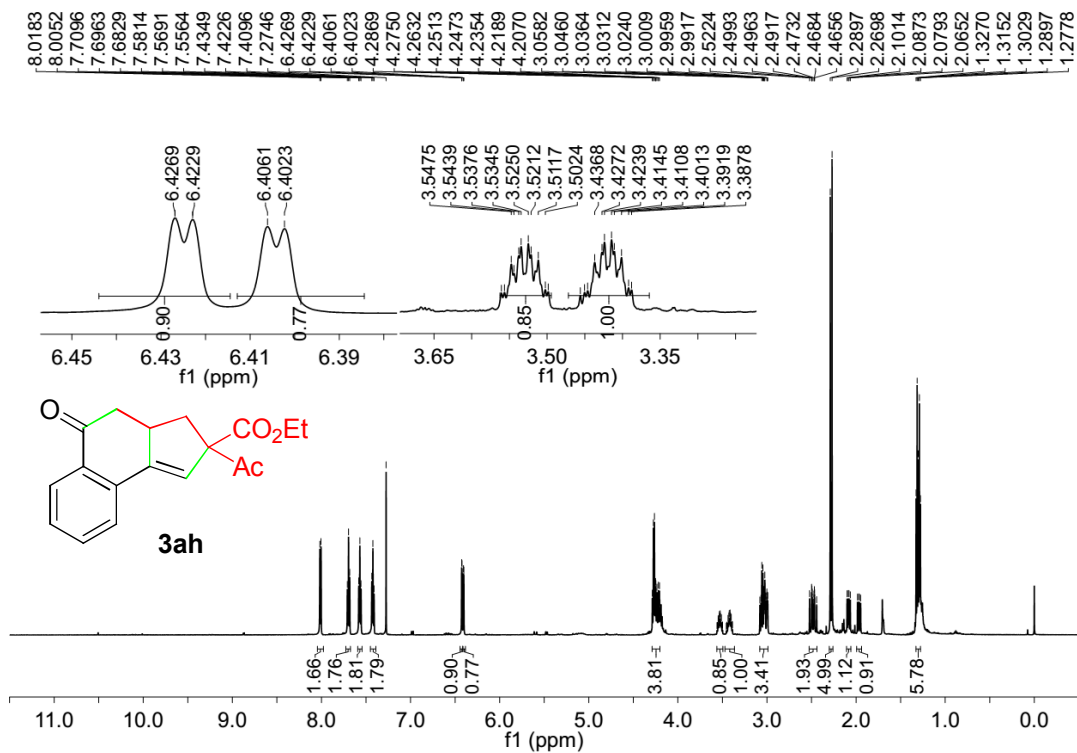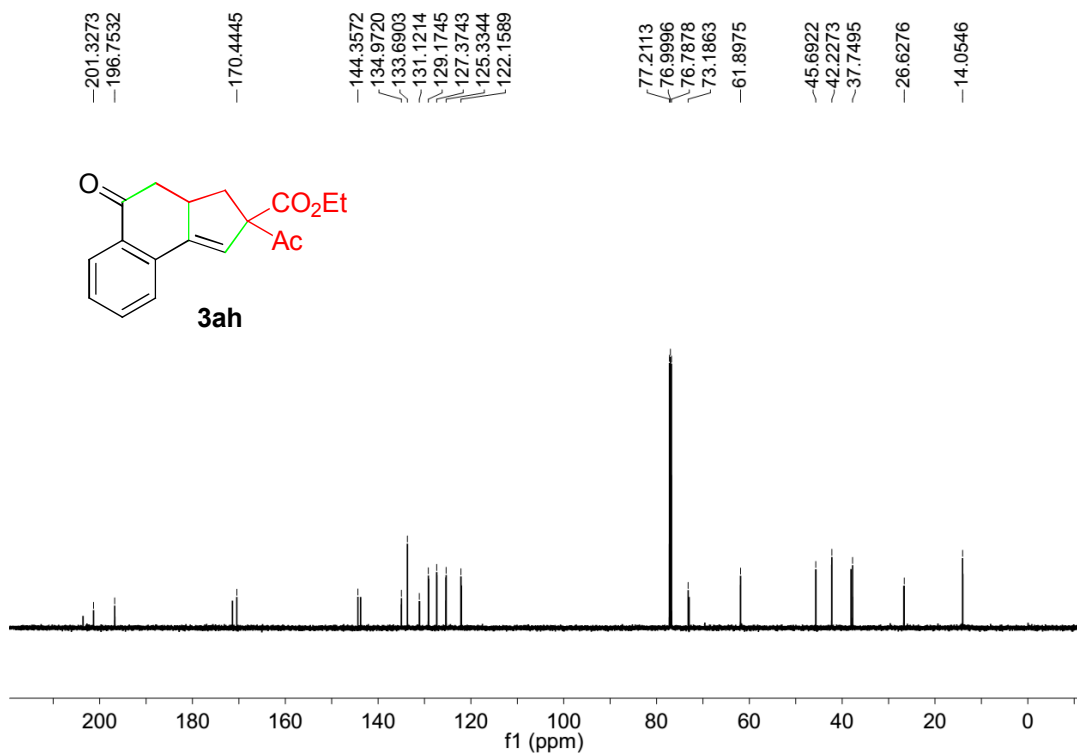

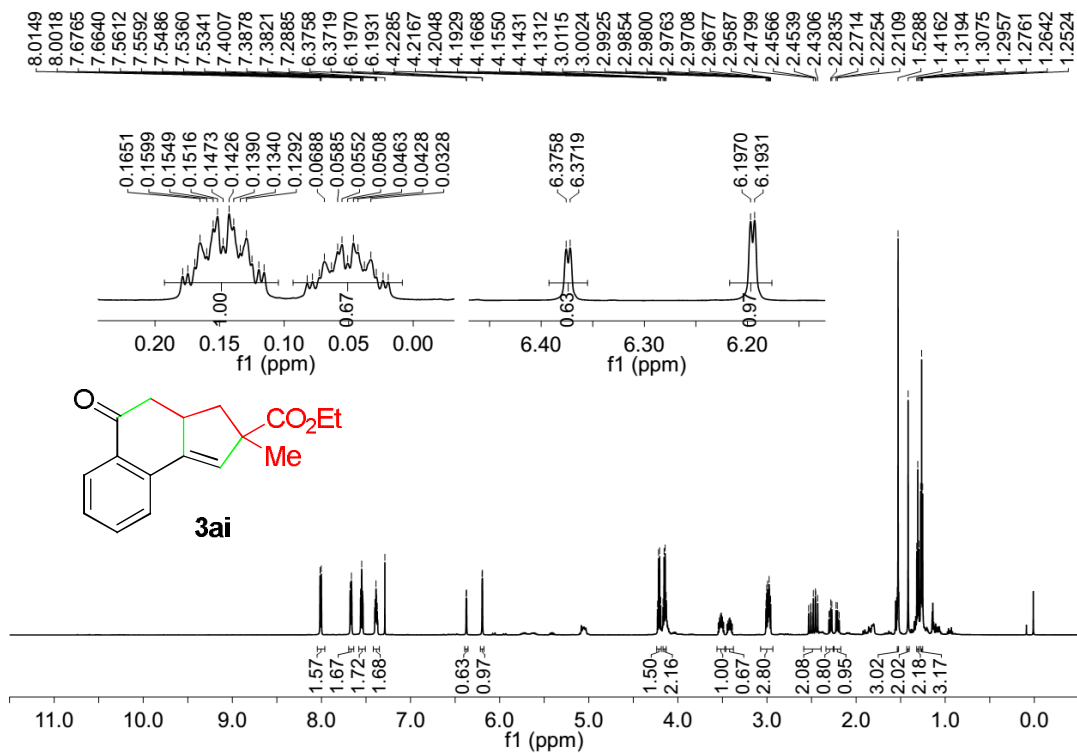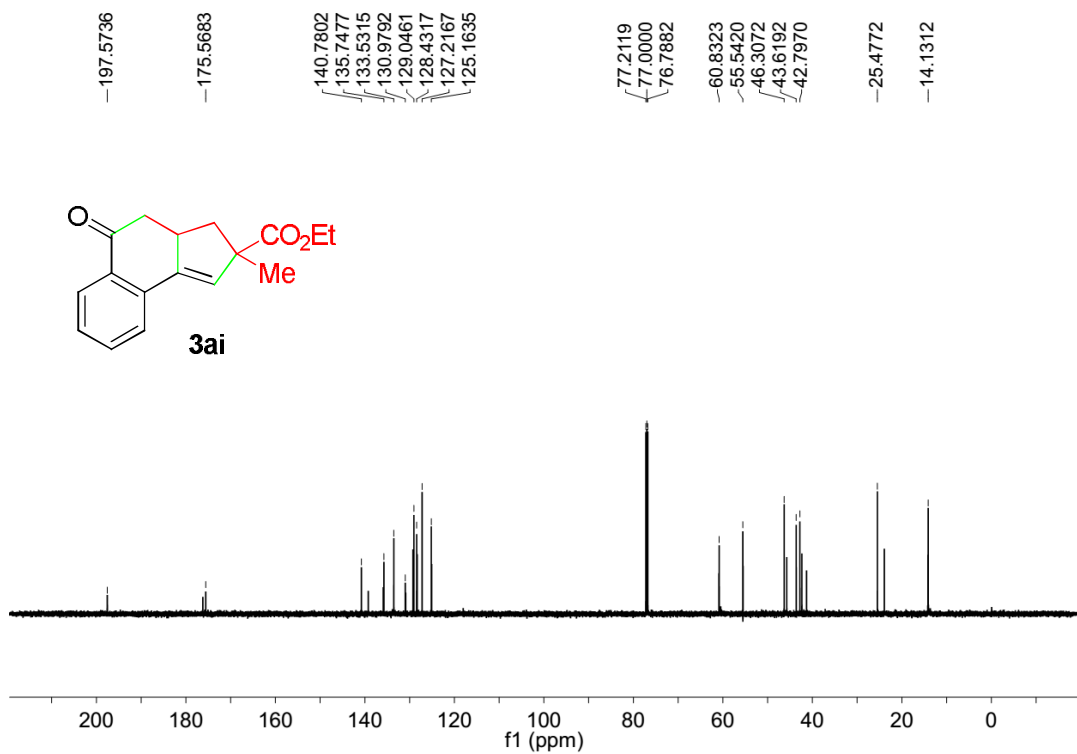

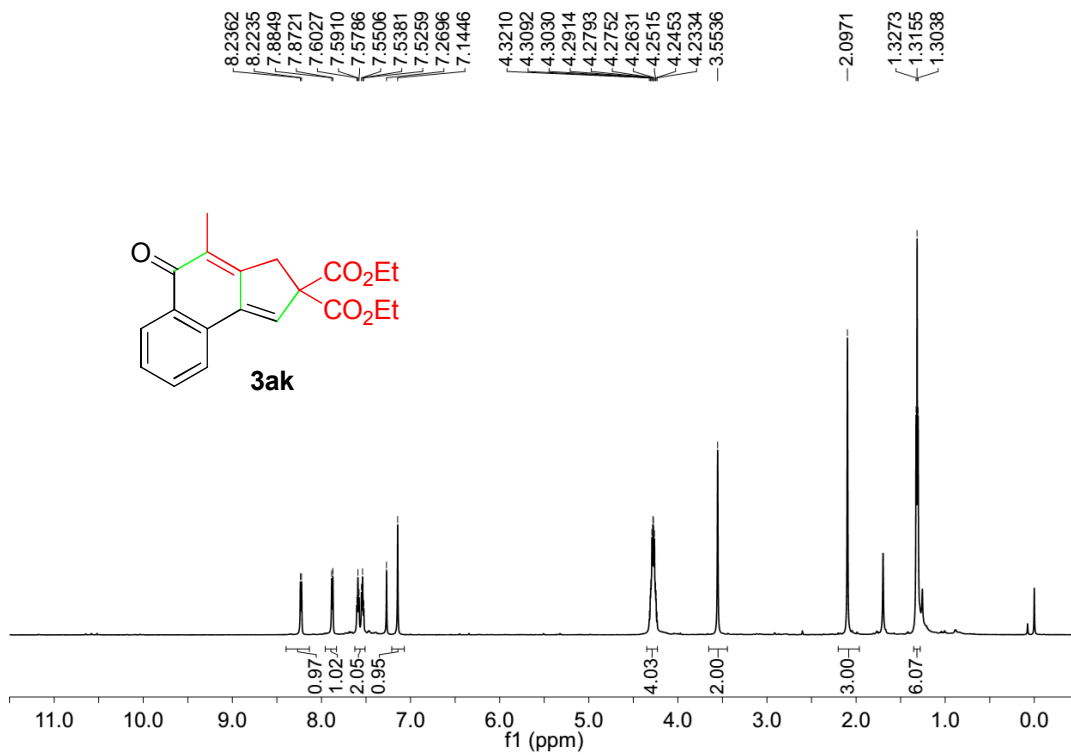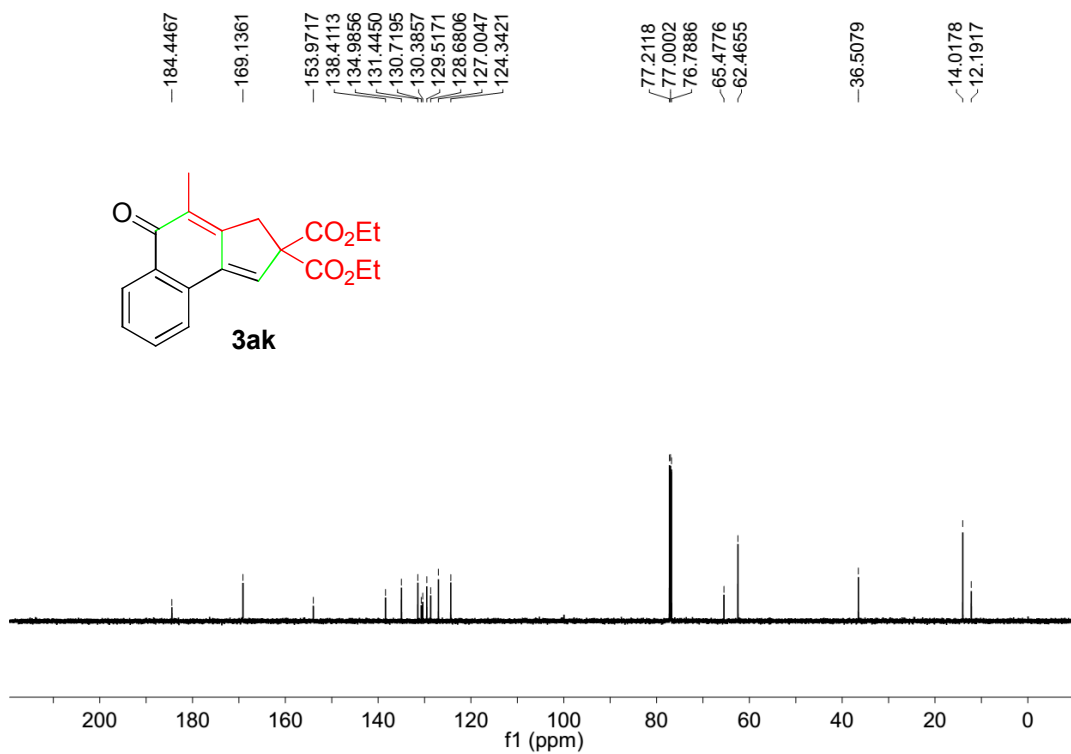

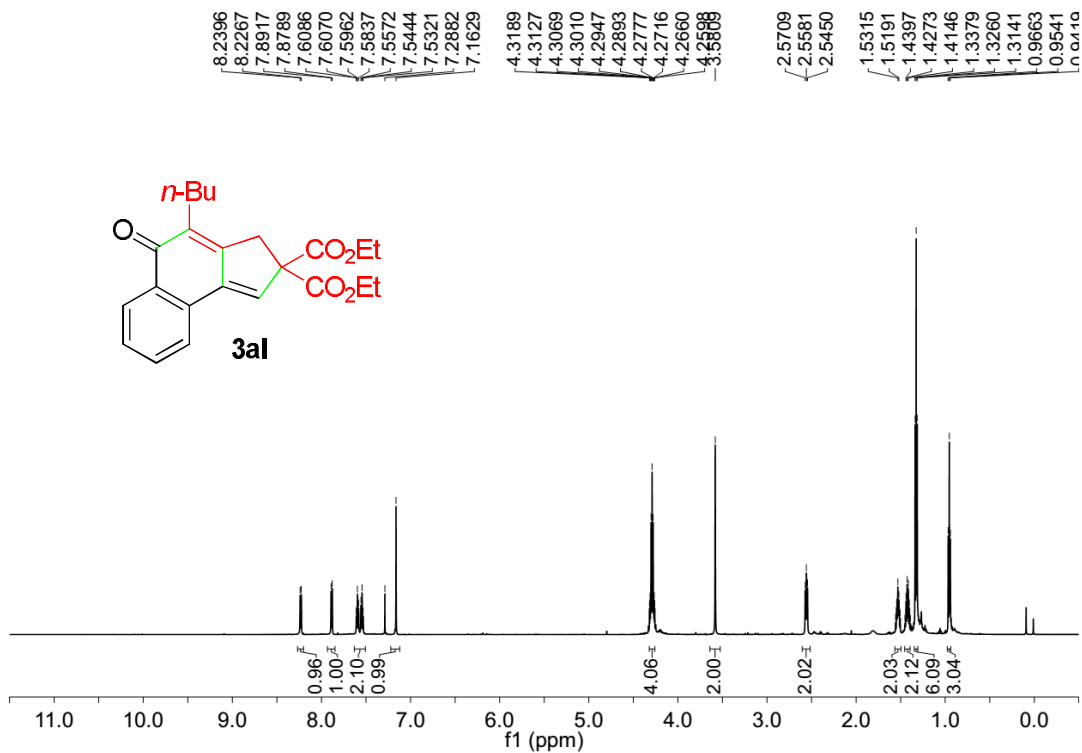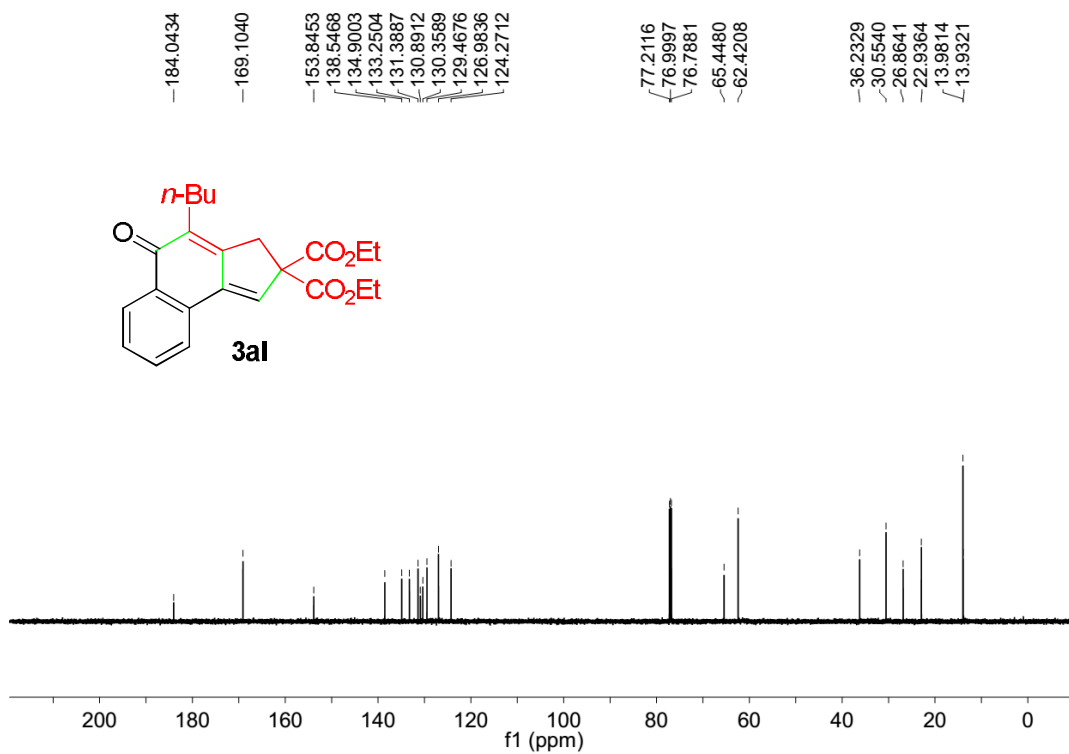

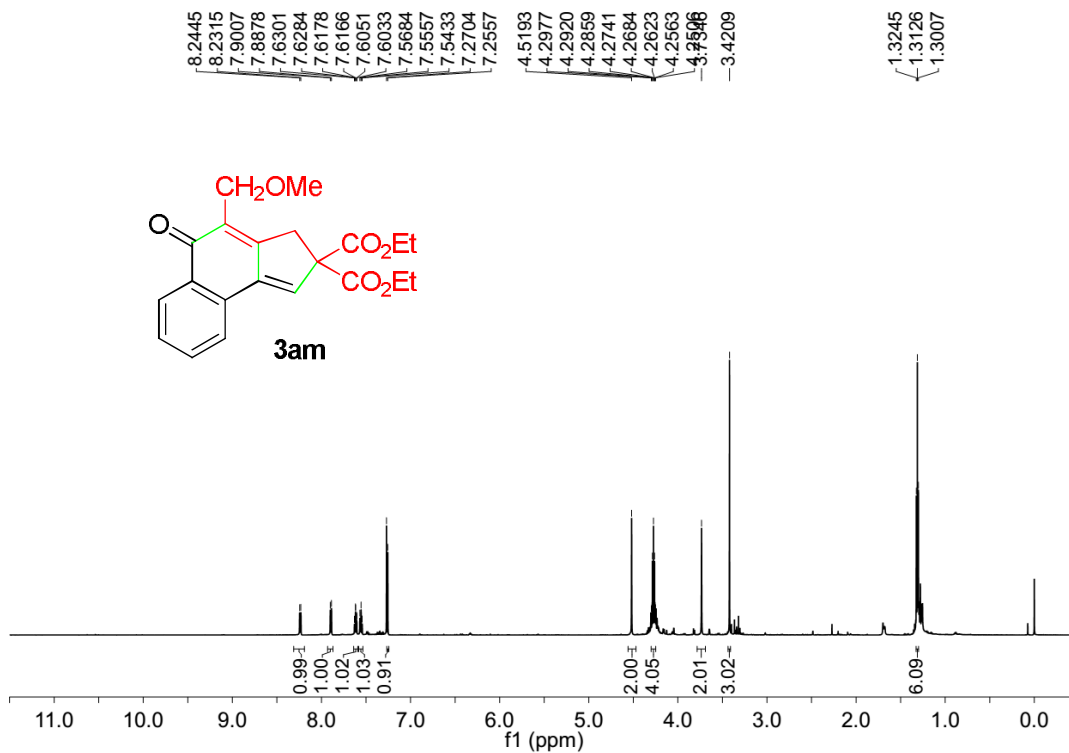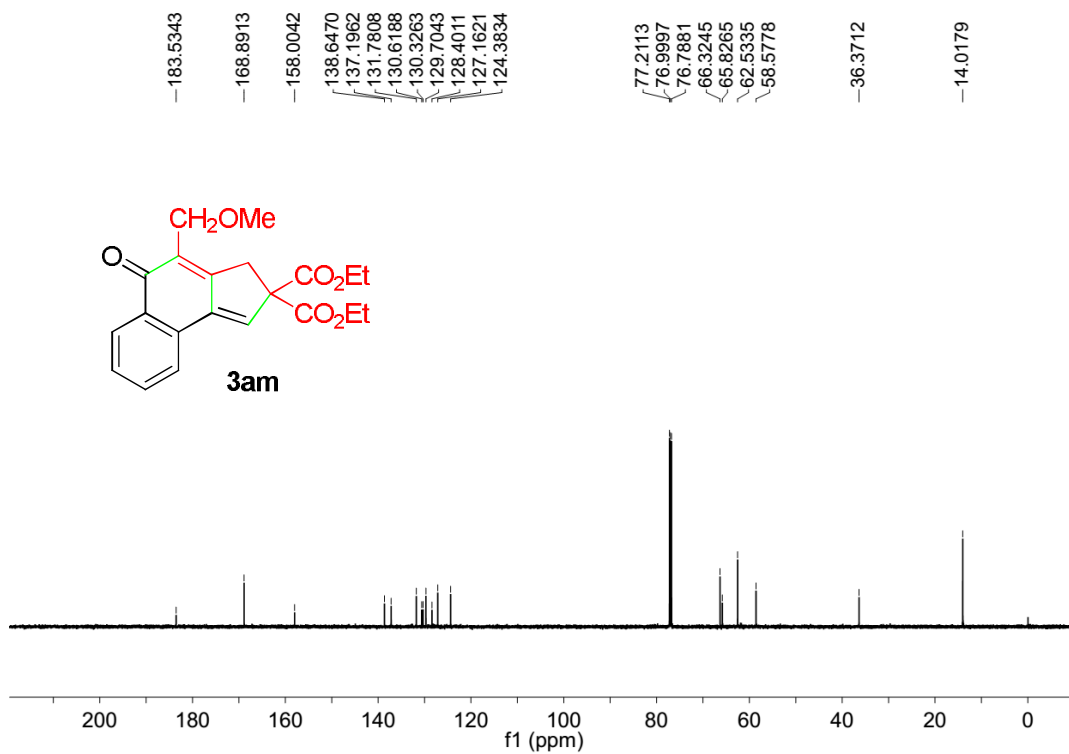

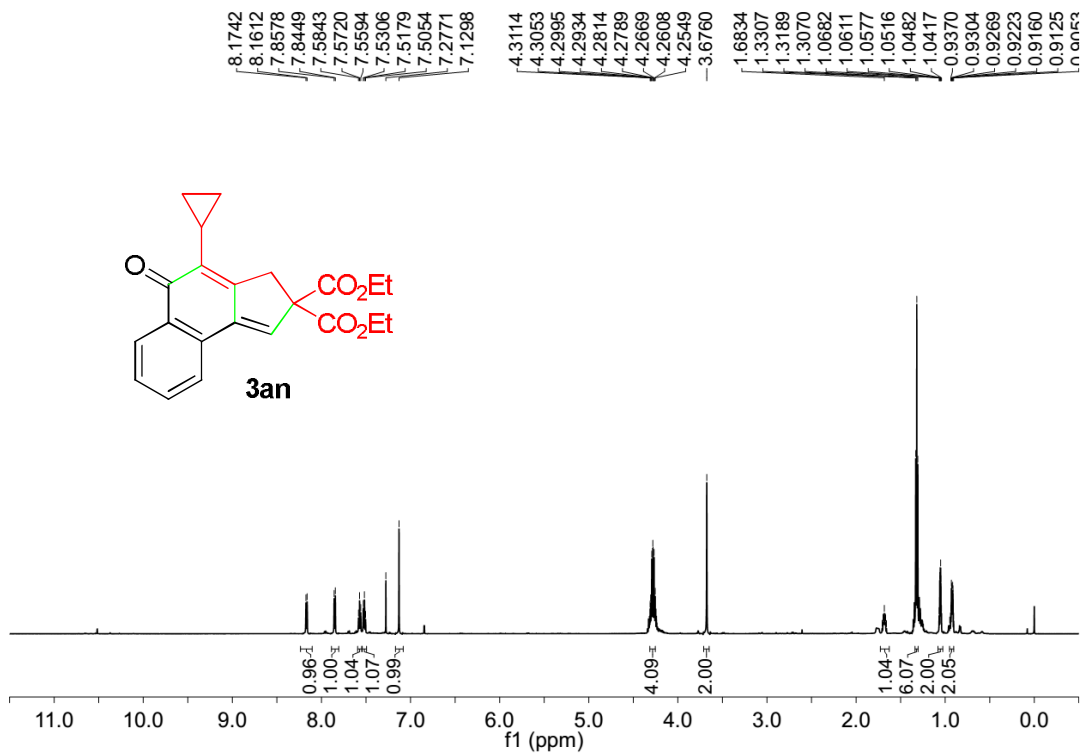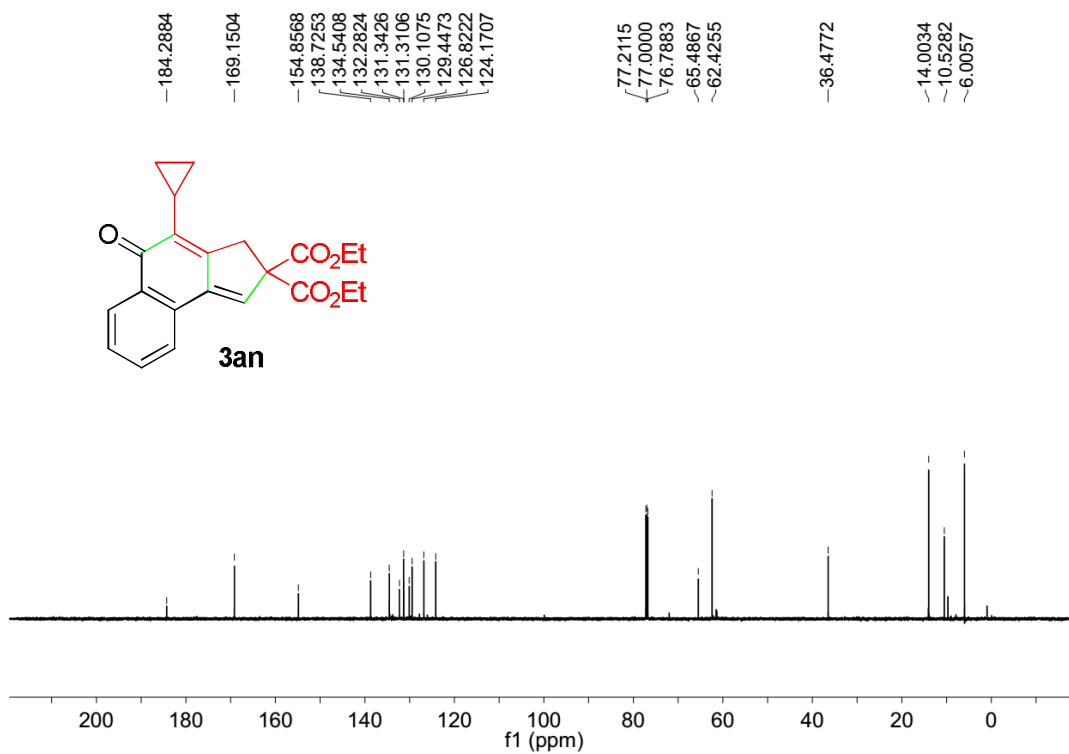



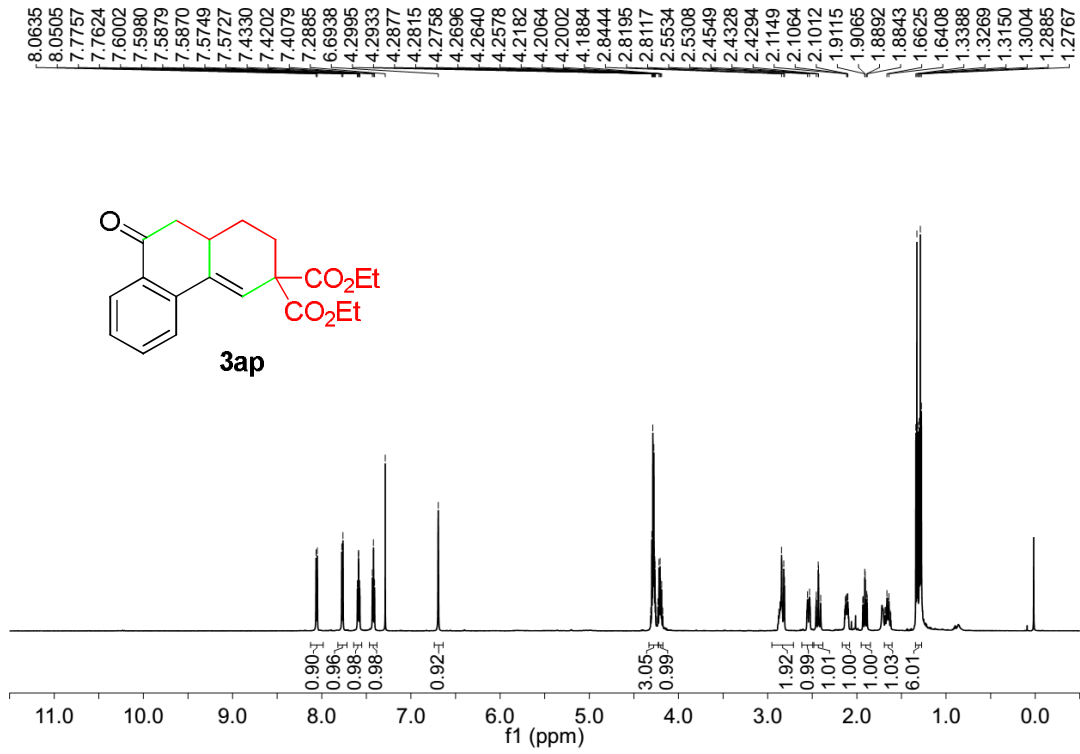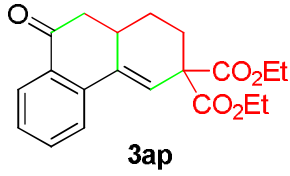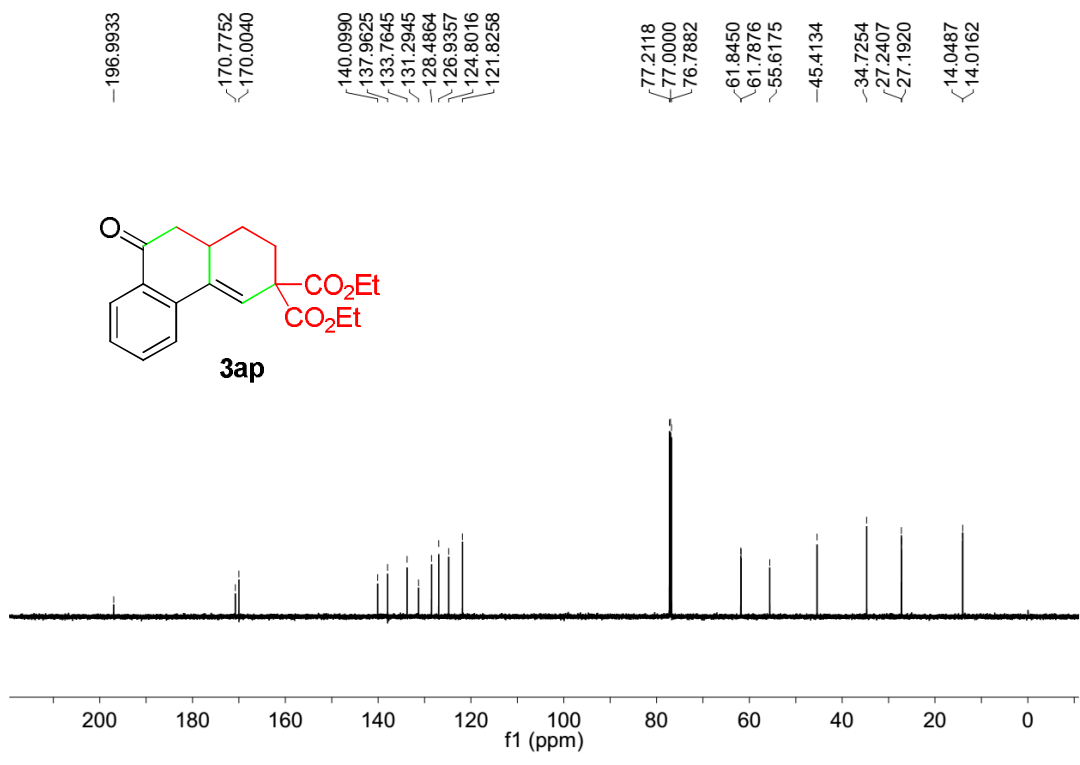

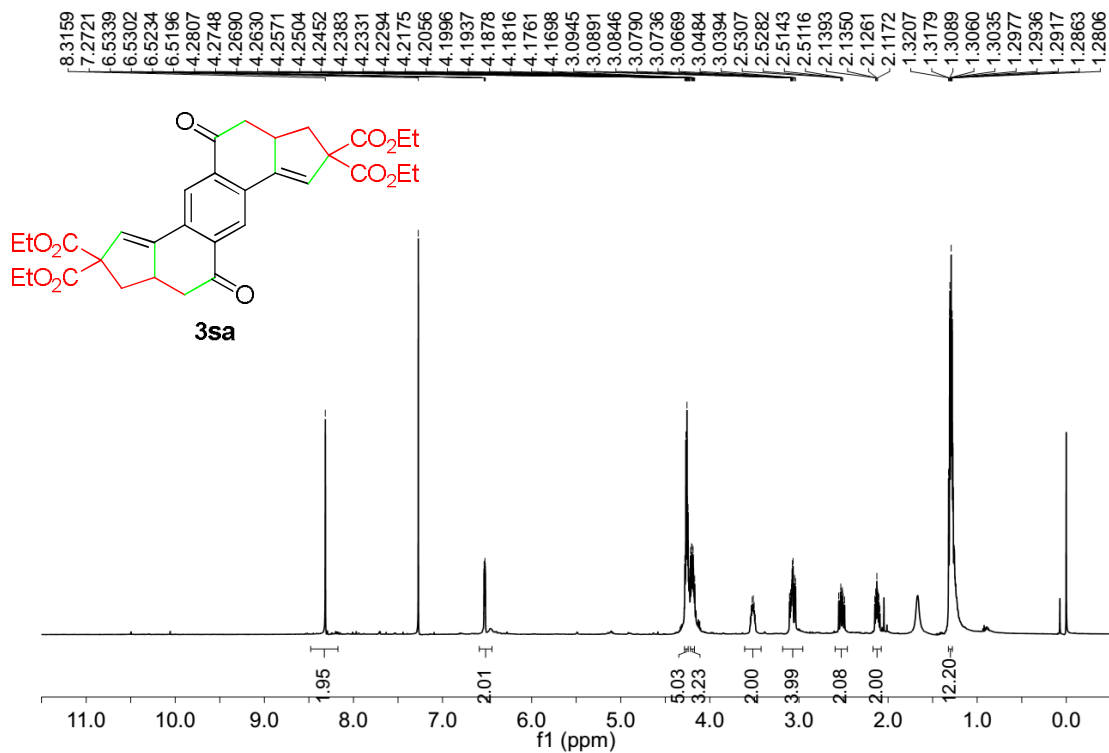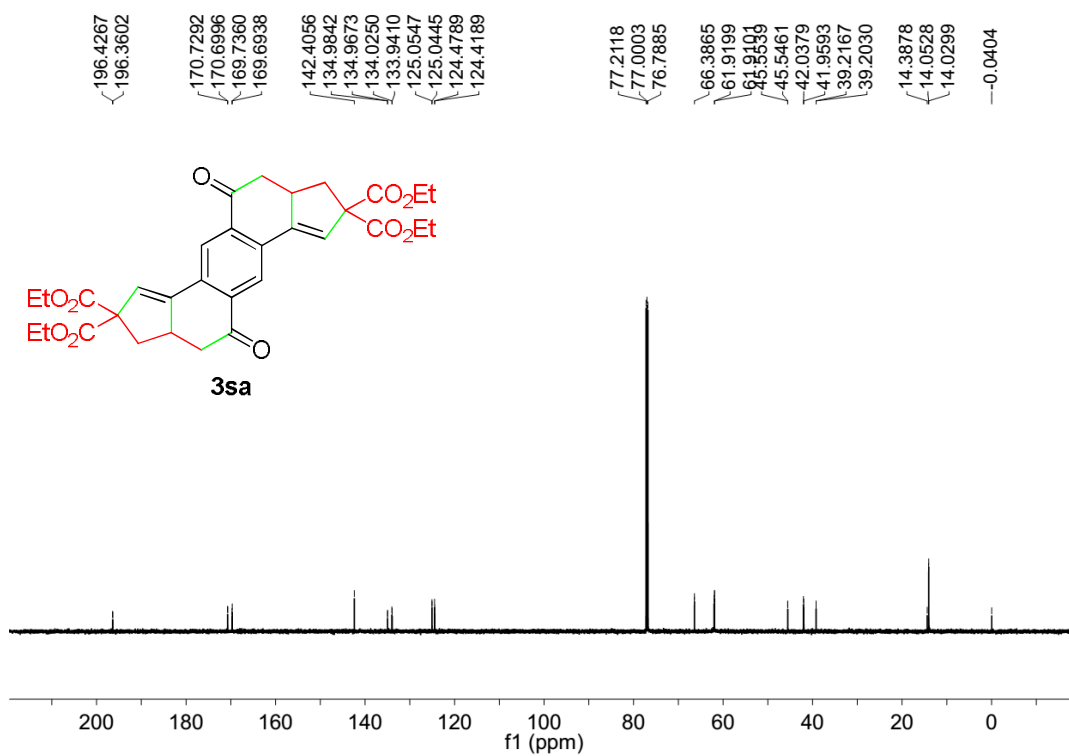

8.4296  
8.4198  
7.2894  
6.8475  
6.8097  
4.3194  
4.3125  
4.3075  
4.3009  
4.2981  
4.2956  
4.2892  
4.2839  
4.2768  
4.2376  
4.2257  
4.2211  
2.8925  
2.8853  
2.8616  
2.8438  
2.5533  
2.5480  
2.5309  
2.4933  
2.4697  
2.4447  
2.1427  
2.1287  
2.1373  
2.1196  
2.1148  
2.1120  
1.9597  
1.9547  
1.9491  
1.9441  
1.6961  
1.6588  
1.6526  
1.6367  
1.6311  
1.3207  
1.3172  
1.3129  
1.3054  
1.3010  
1.2947  
1.2891  
1.2832

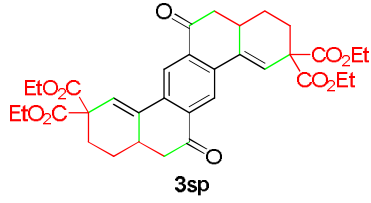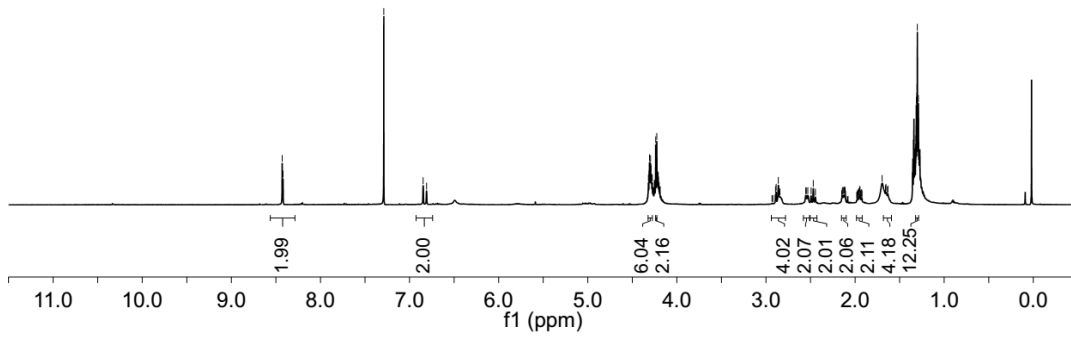

196.6717  
196.6617  
170.5018  
170.4661  
169.9979  
169.9625  
139.3713  
139.2221  
136.8927  
136.7387  
134.3364  
134.2926  
123.9387  
123.8002  
123.1089  
123.0465  
77.2120  
77.0000  
76.7885  
62.0446  
61.9180  
61.8962  
55.3709  
55.3709  
45.3488  
34.4211  
34.3562  
27.1833  
27.1583  
14.3884  
14.0450  
14.0328

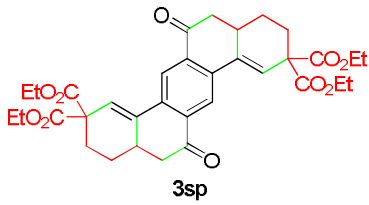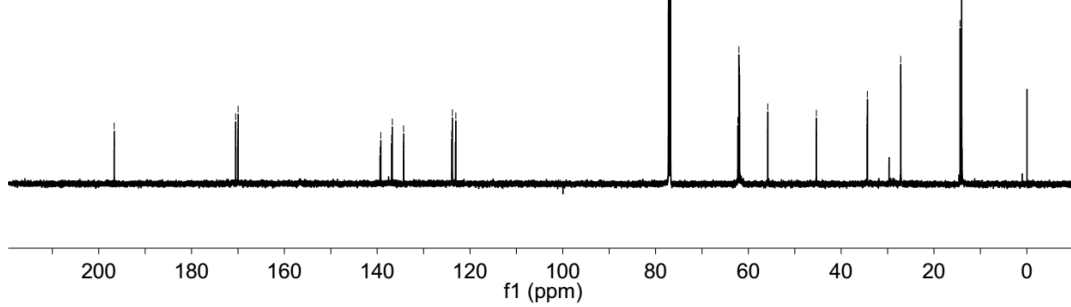

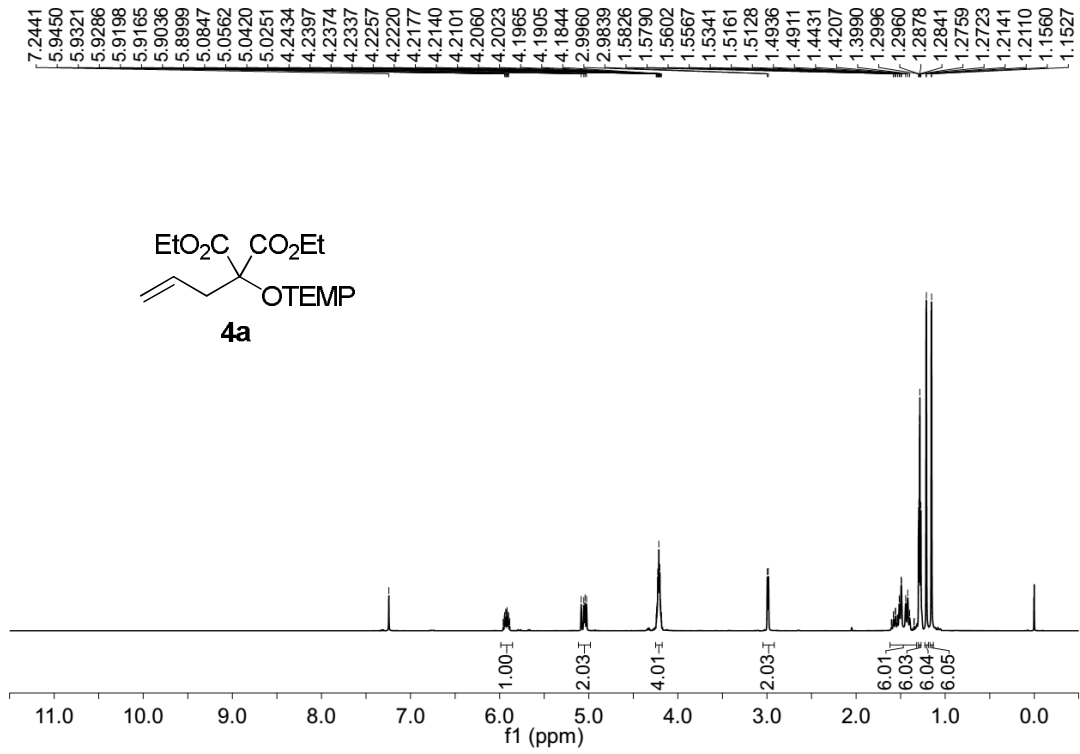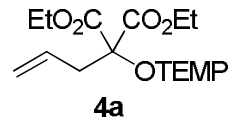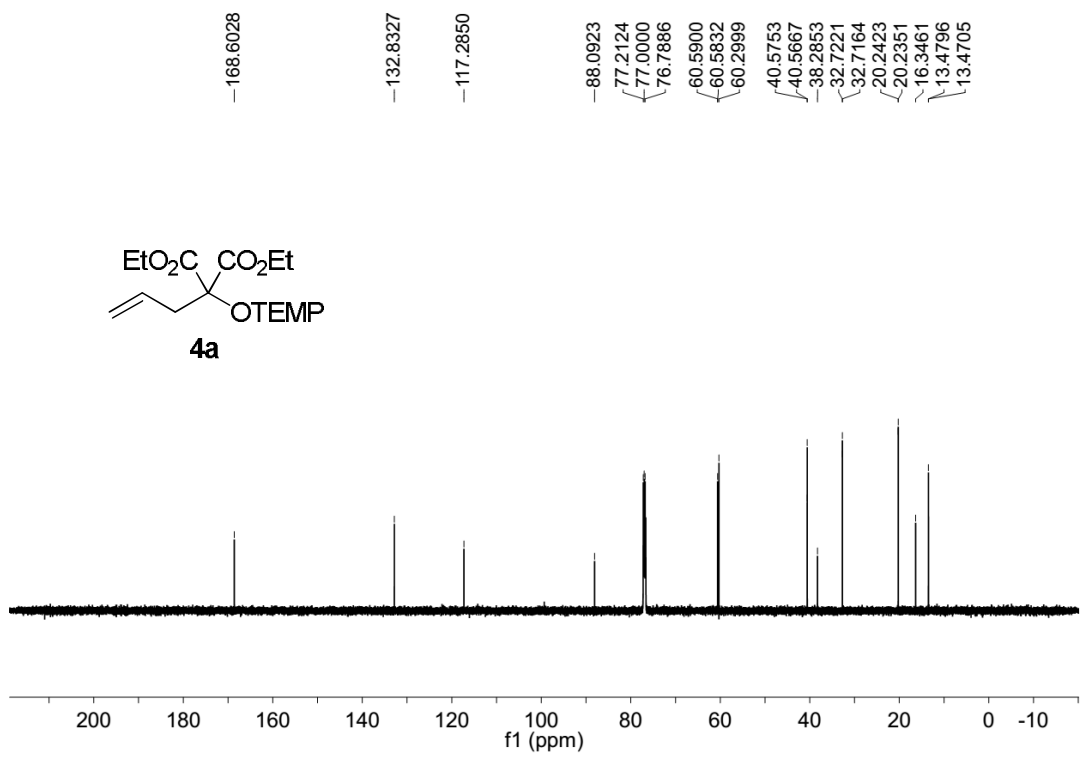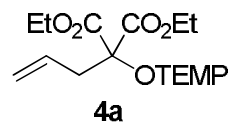

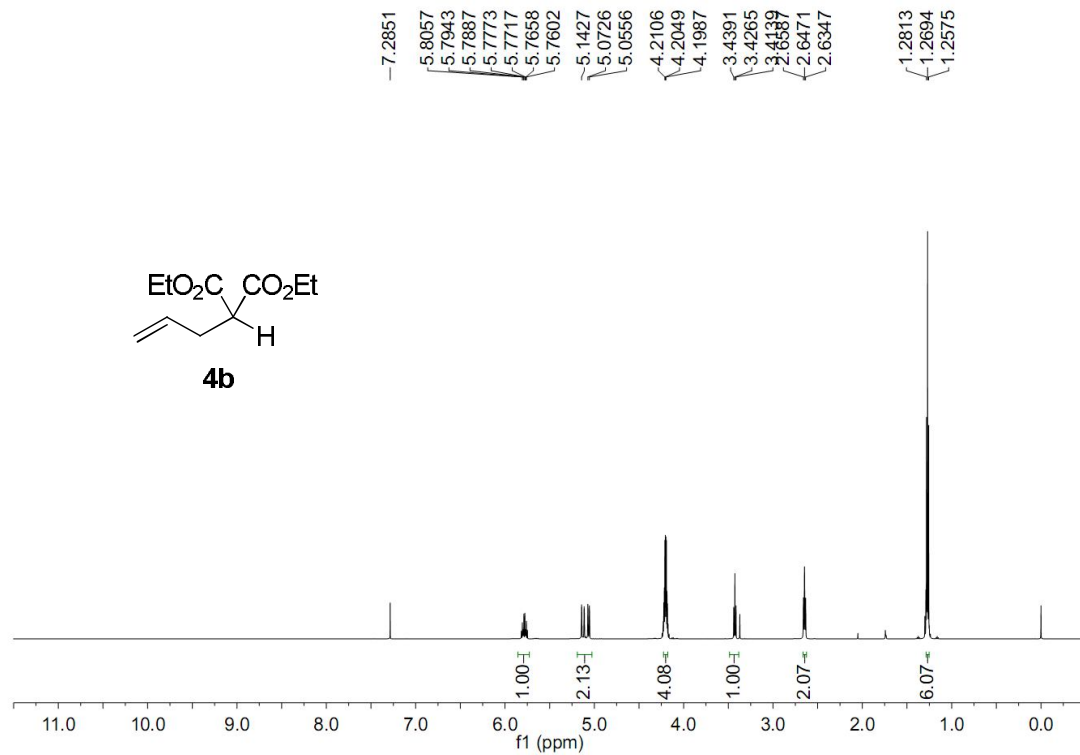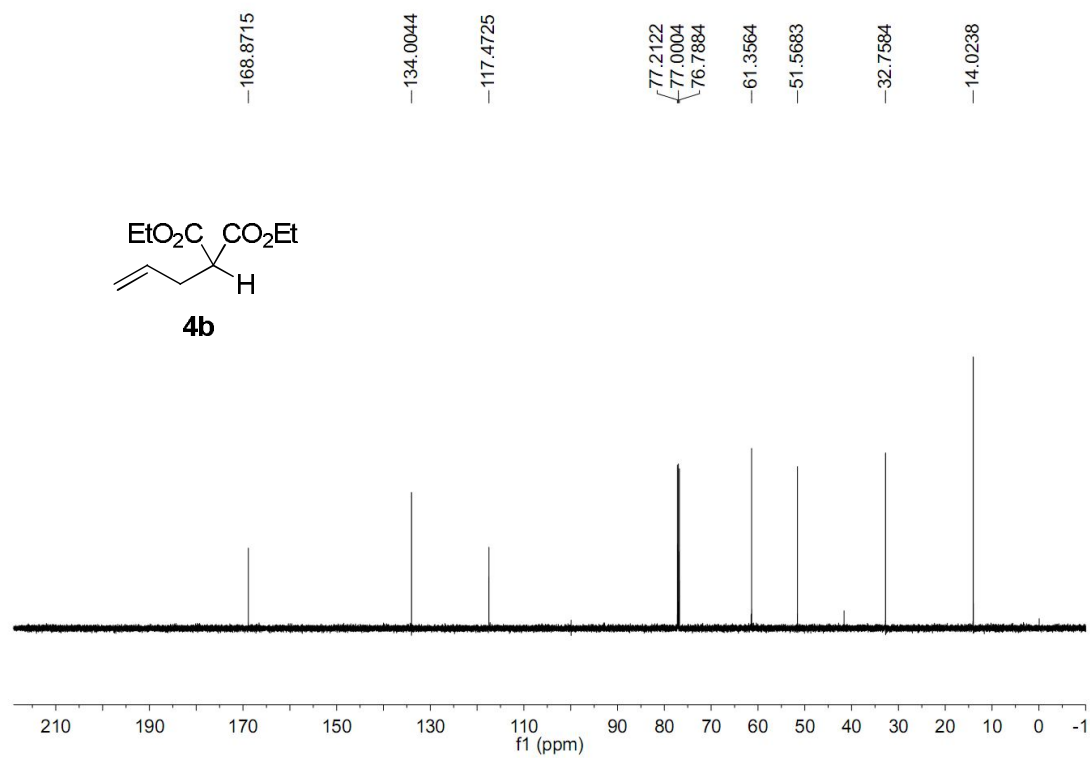

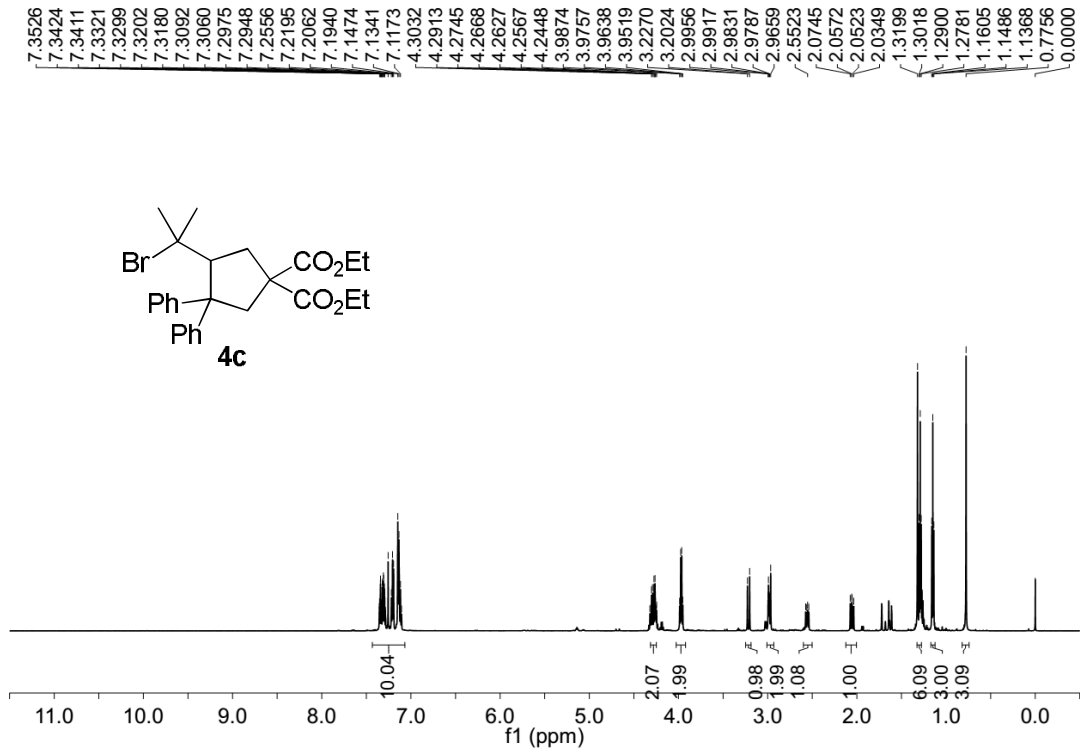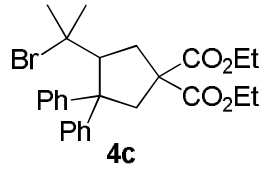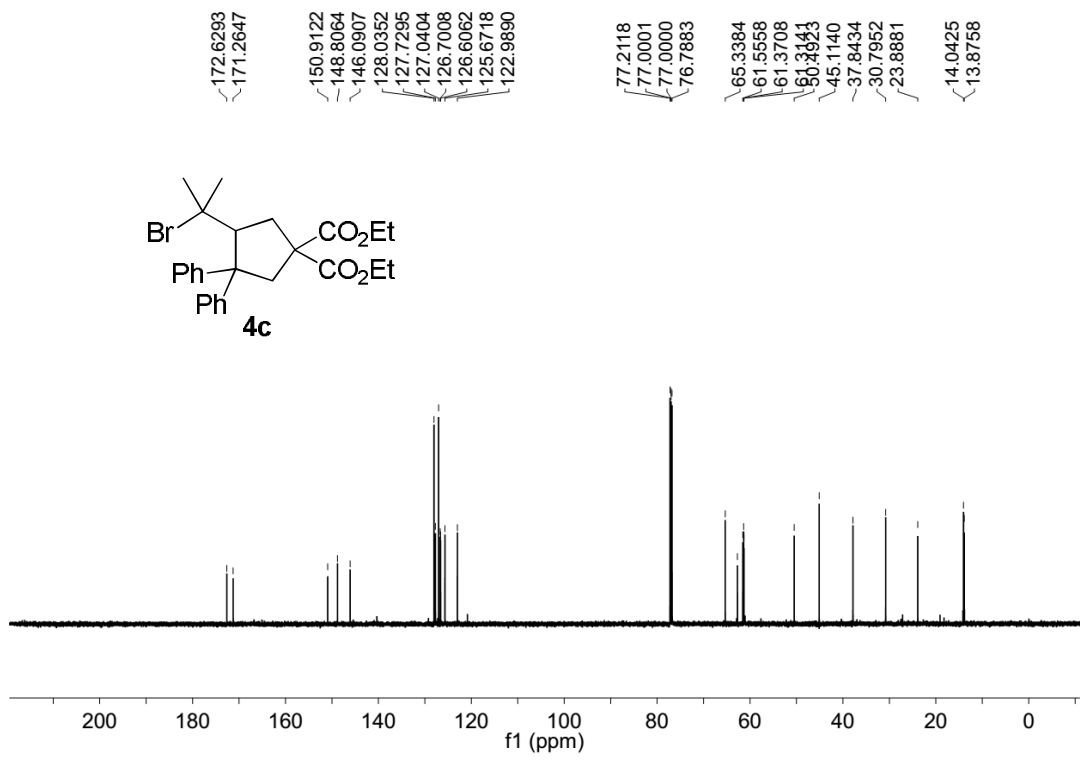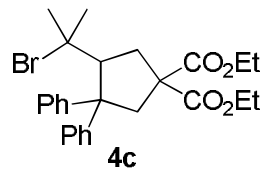

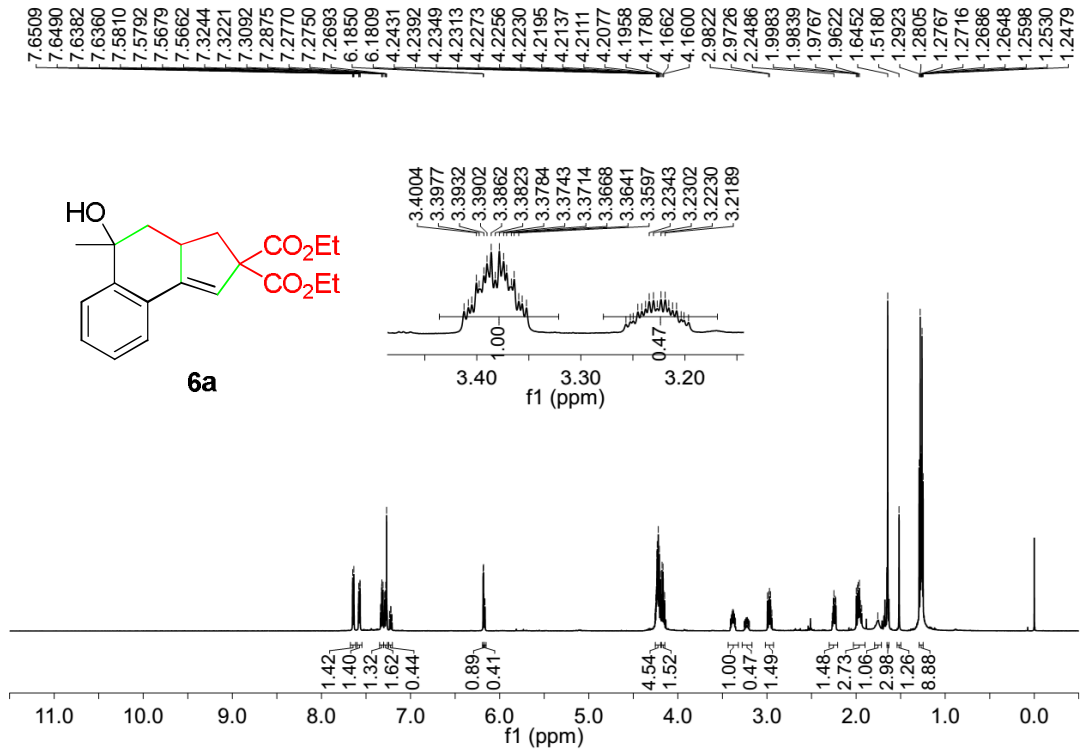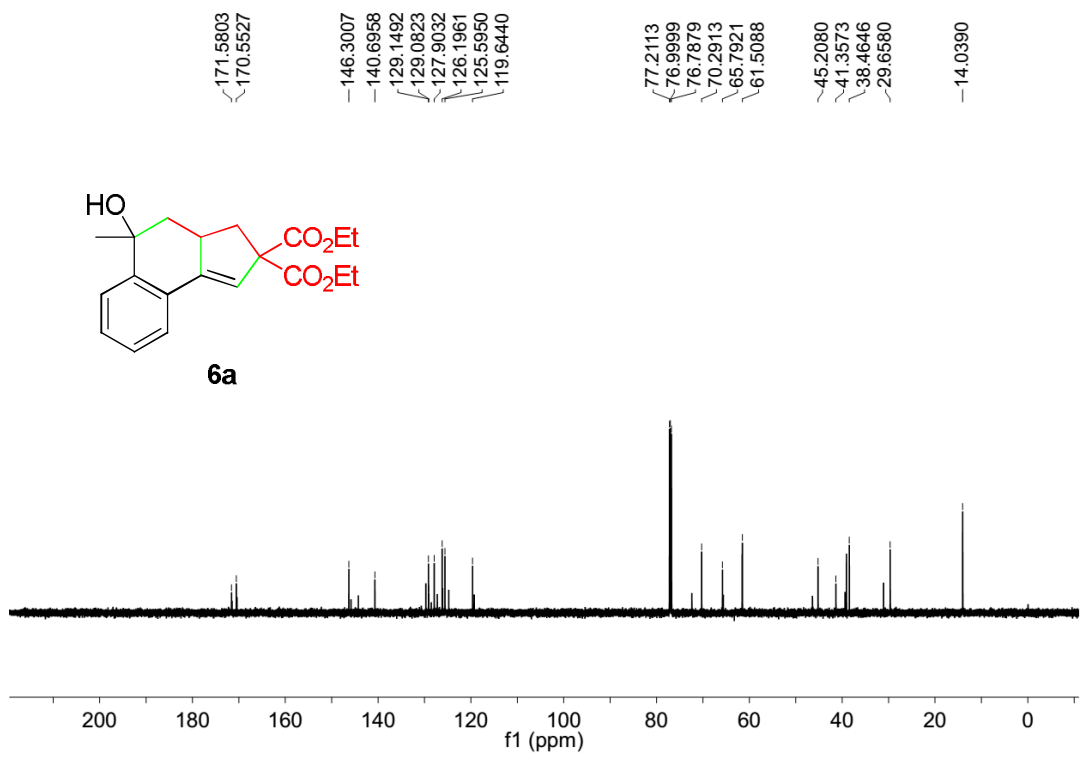

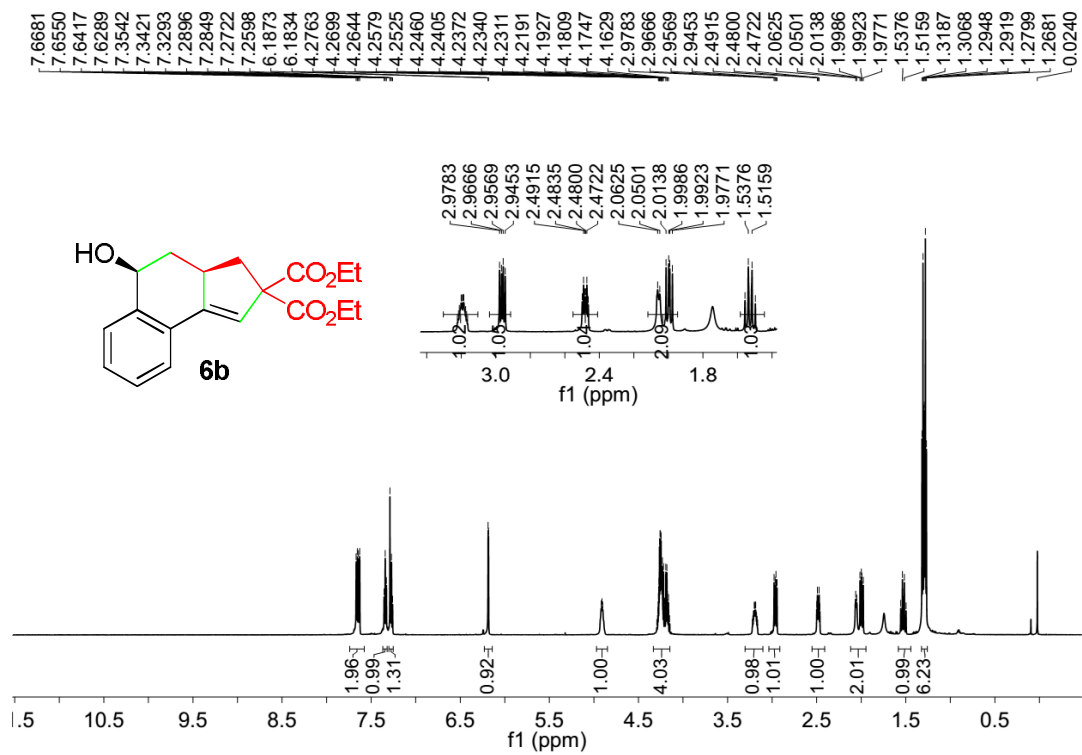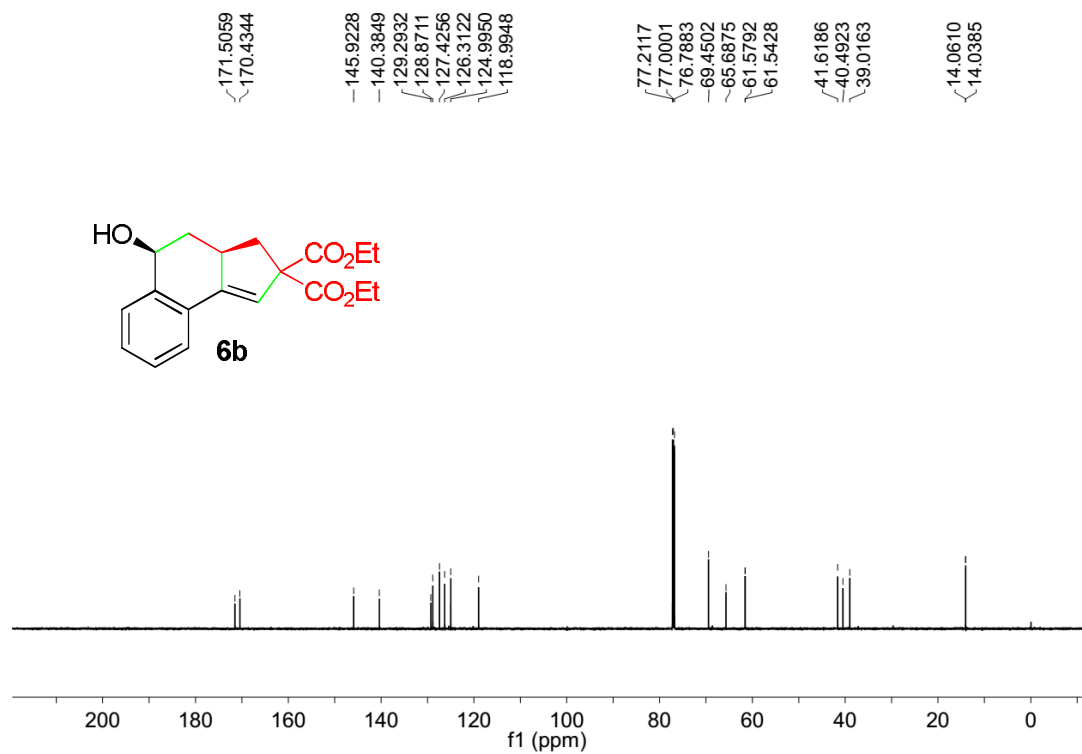



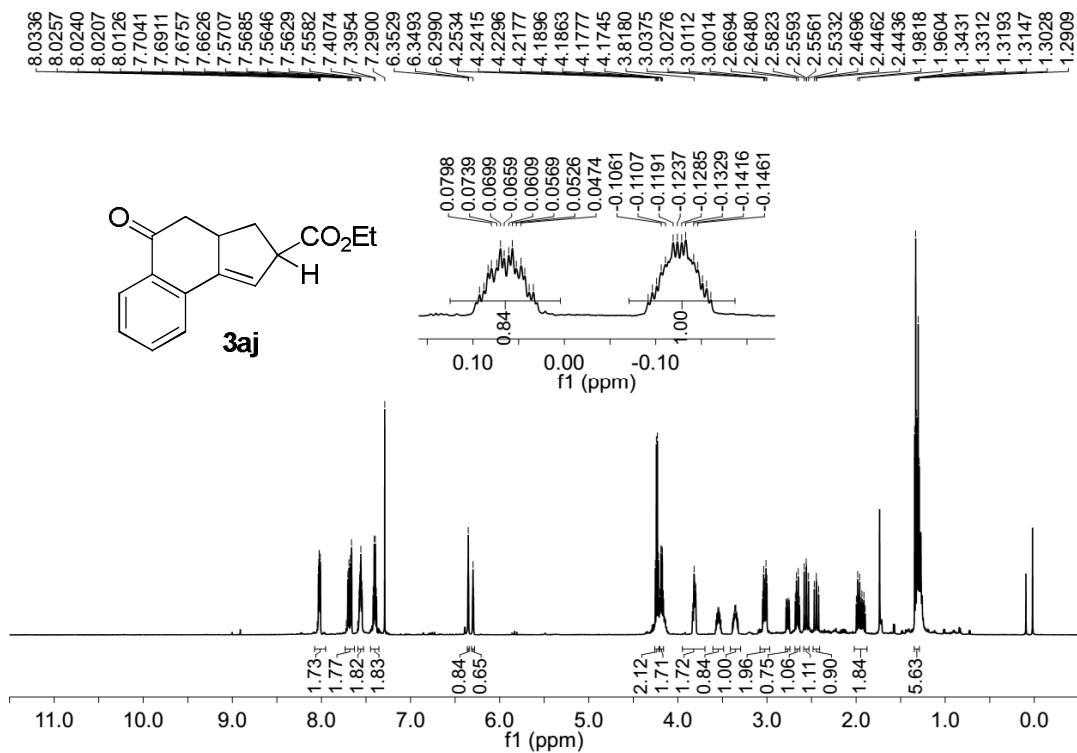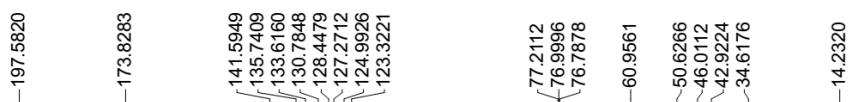

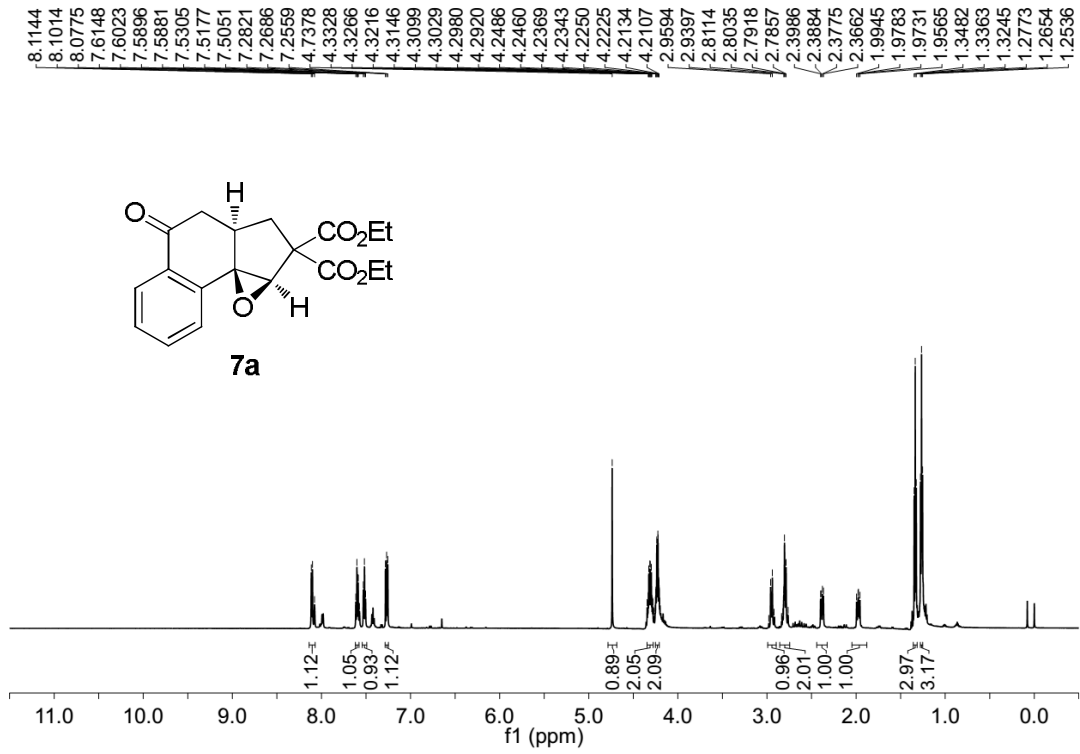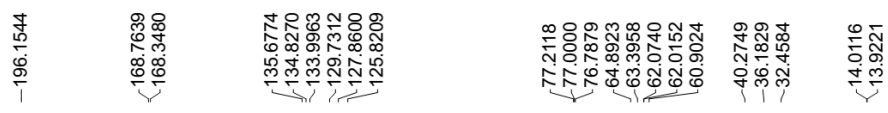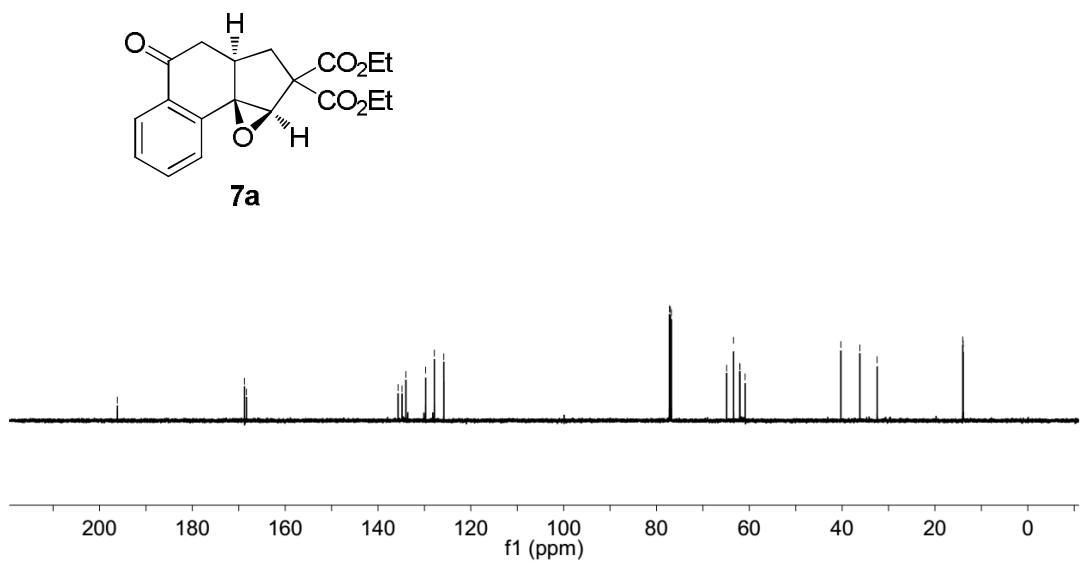

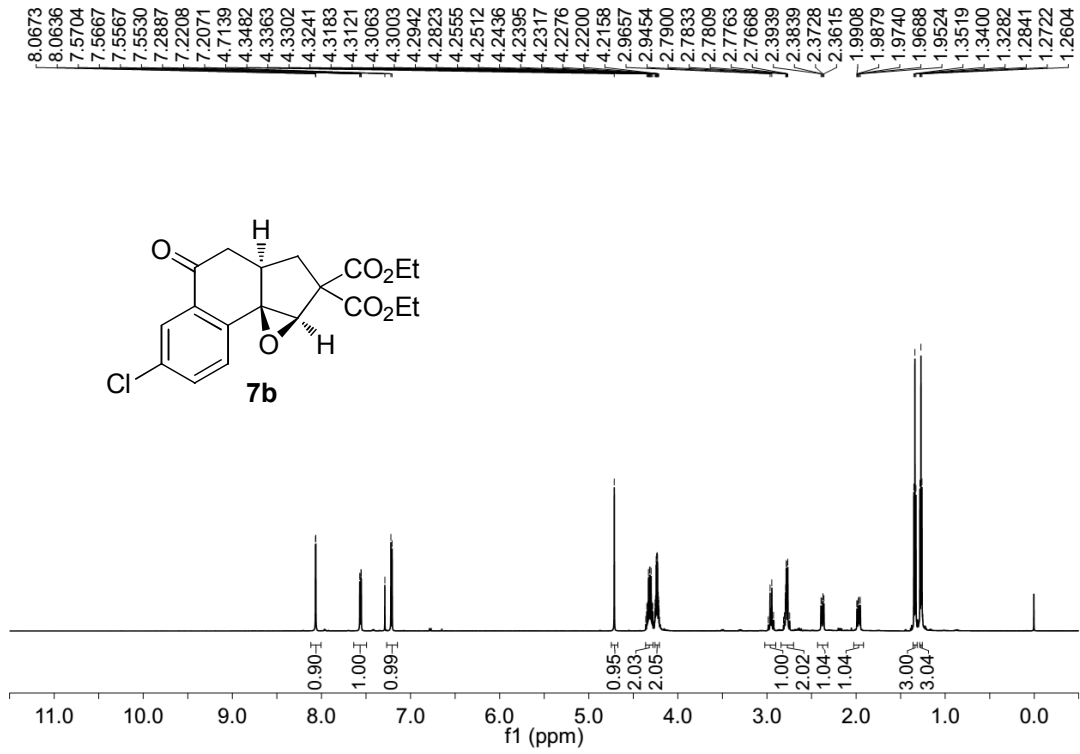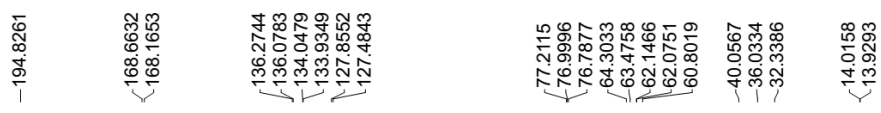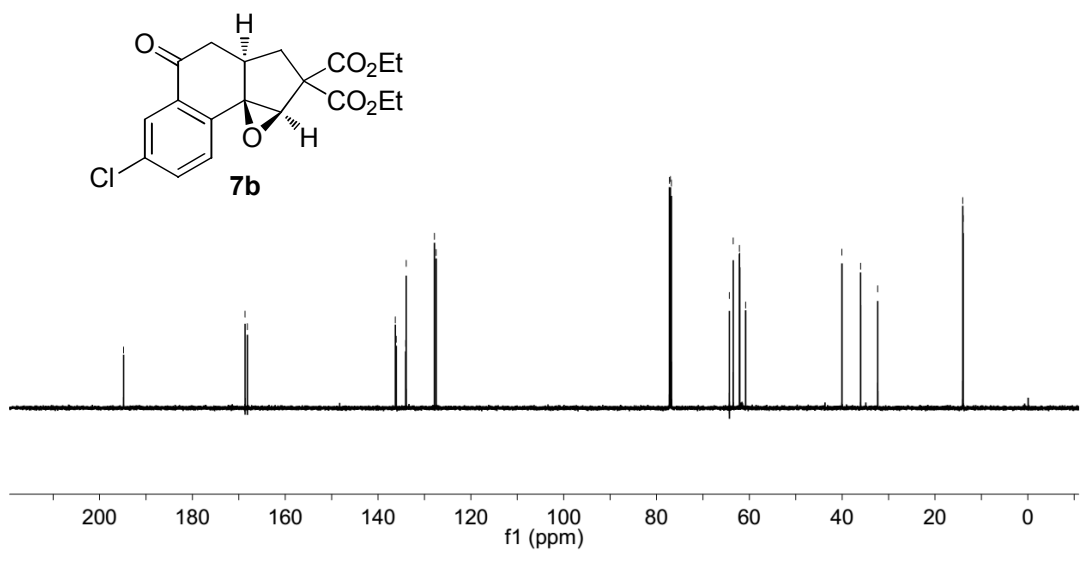

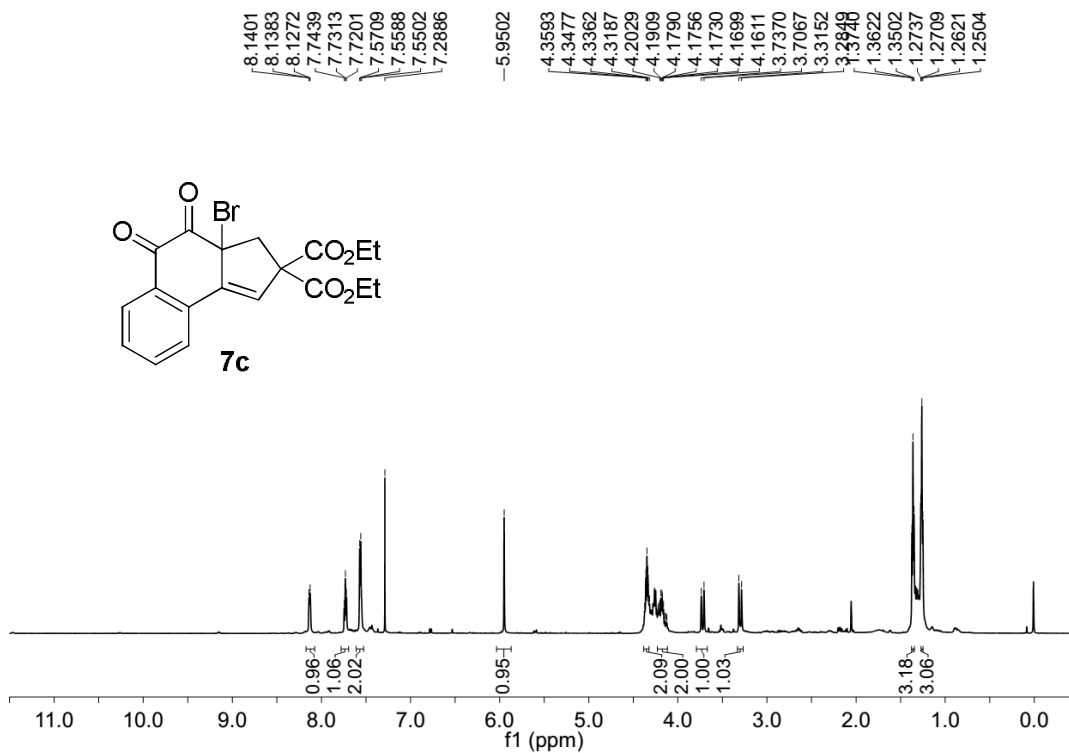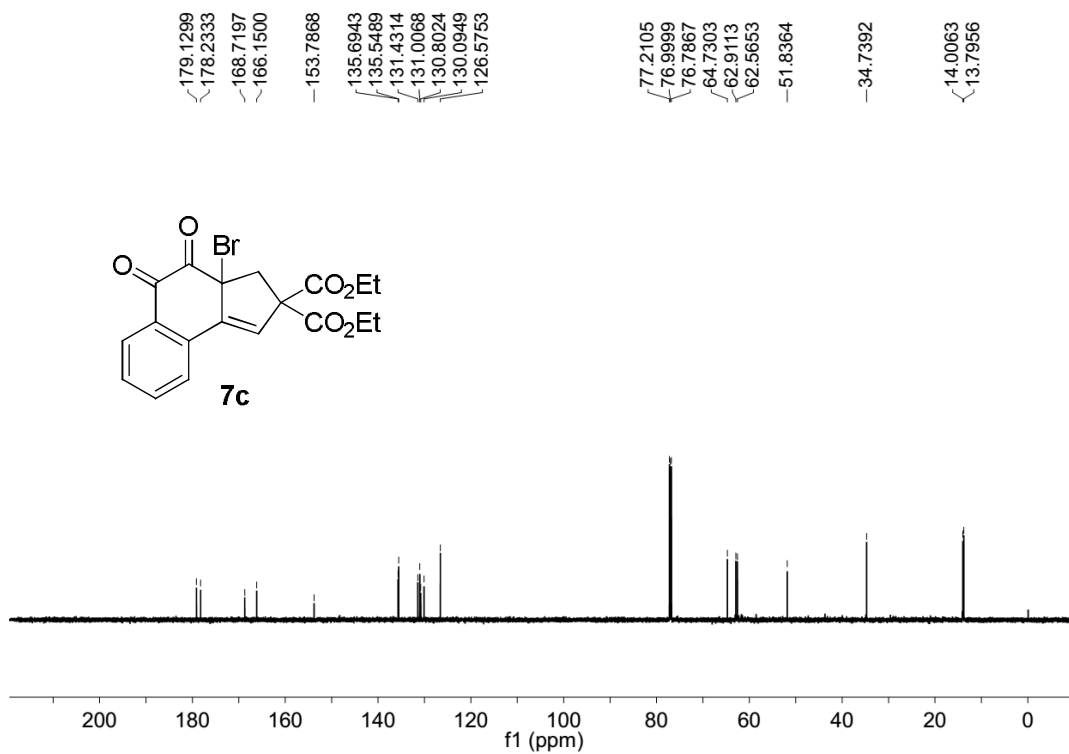

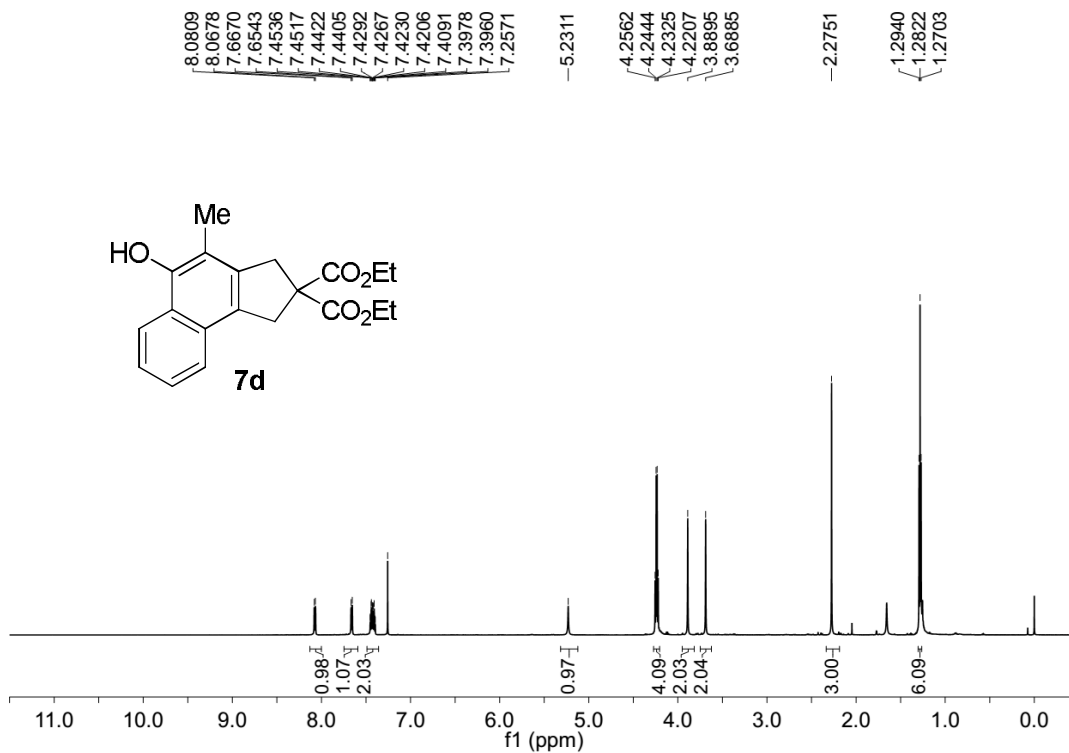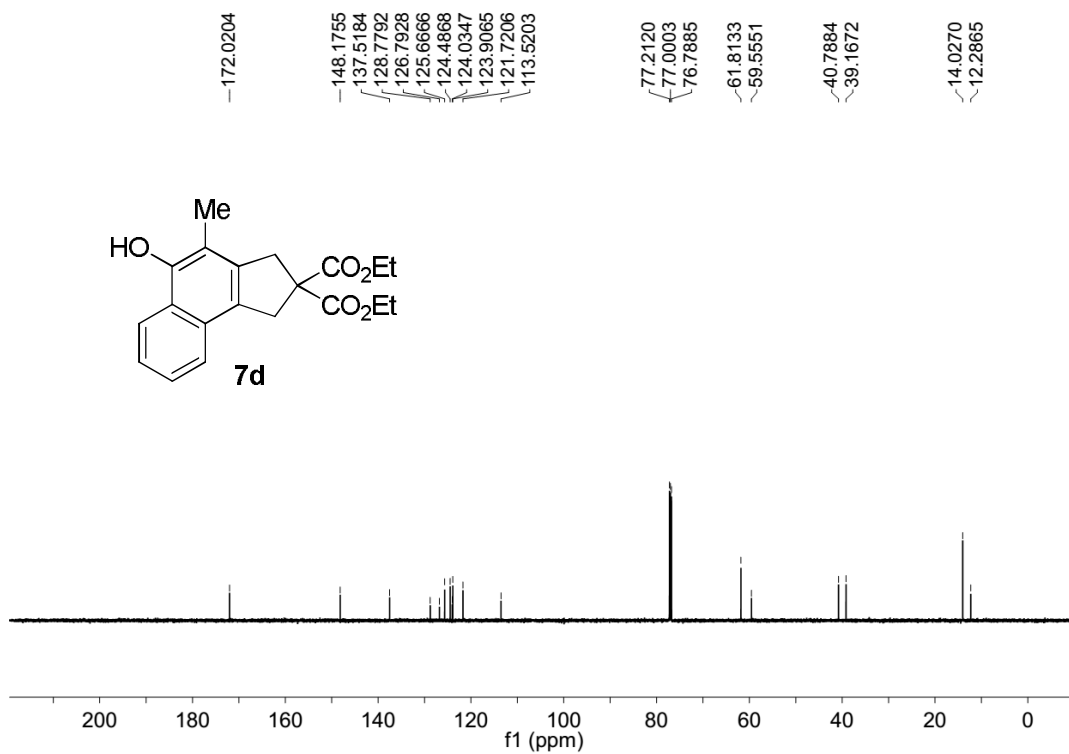

Supplement: SC-007-C5SC04980F-s001.pdf [file SC-007-C5SC04980F-s001.pdf]
